# Supplementary material for: Interest in new heterodinuclear transition-metal/main-group-metal complexes: DFT study of electronic structure and mechanism of fluoride sensing function
Source: Royal Society of Chemistry journal article supplement (doi:10.1039/c3dt50597a), 2013-01-01
Supplement: c3dt50597a.pdf [file c3dt50597a.pdf]

Electronic Supplementary Information

**Interests in new heterodinuclear transition-metal/main-group-metal complexes: DFT study of electronic structure and mechanism of fluoride sensing function**

Wei Guan, Shinichi Yamabe and Shigeyoshi Sakaki\*

Fukui Institute for Fundamental Chemistry, Kyoto University, Takano-Nishihiraki-cho 34-4, Sakyo-ku, Kyoto 606-8103,  
Japan

Email: sakaki.shigeyoshi.47e@st.kyoto-u.ac.jp

The material enclosed in the supporting information is organized as following:

1. The computational strategy for optimizing the species in Table 2. (page S3)
2. Why is the positive charge of the Sb center smaller in **2** and **3** than in **1**? (page S3)
3. Absorption spectra of **2** and **2F**. (page S3)
4. Optimized structures of model systems **2<sub>m</sub>**, **2<sub>m</sub>F**, **3<sub>m</sub>**, **3<sub>m</sub>F** and **2<sub>m</sub>Si**. (Fig. S1, page S4)
5. Optimized structures and selected geometric parameters of **4**, **4F**, **5**, and **5F**. (Fig. S2, page S4)
6. Optimized structures and selected geometric parameters of **6**, **6F**, **7**, **7F**, **8**, and **8F**. (Fig. S3, page S5)
7. Optimized structures and relative energies of **4F-8F** and **4F'-8F'**. (Fig. S4, page S5)
8. Optimized structures of SbPh<sub>3</sub> and [NMe<sub>4</sub>]FSbPh<sub>3</sub>. (Fig. S5, page S6)
9. Optimized structures and relative energies of **3Cl**, **3Cl'**, **3Br**, **3Br'**, **3SCN**, and **3SCN'**. (Fig. S6, page S6)
10. Optimized structures and relative energies of **3CN**, **3CN'**, **5CN**, **5CN'**, **6CN**, and **6CN'**. (Fig. S7, page S7)
11. Molecular orbitals for **3F'** involved in the dominant electron transitions. (Fig. S8, page S7)
12. Molecular orbitals for **5**, **6**, **8** and their fluoride adducts involved in the dominant electron transitions. (Fig. S8, page S8)
13. Electron density maps for the PCM/PBE0/BS-I optimized structures of **1-3** mapped with the electrostatic potential (Isoval = 0.004) from the total SCF density. (Fig. S10, page S9)
14. Optimized structures and relative energies for four isomers of **3[BMe<sub>4</sub>]**. (Fig. S11, page S9)
15. Structure and representations of five d orbitals for **2**. (Scheme S1, page S10)
16. Main geometrical parameters of **3** optimized by various functionals (PBE0, mPW1PW91, B3PW91 and B3LYP) and basis set I (BS-I) in gas phase together with available experimental parameters. (Table S1, page S10)

17. Main geometrical parameters of **3** optimized by various functionals (TPSSh, M06, M062X and CAM-B3LYP) and basis set I (BS-I) in gas phase together with available experimental parameters. (Table S2, page S11)
18. Main geometrical parameters of **3** optimized by various functionals ( $\omega$ B97XD, BP86 and BLYP) and basis set I (BS-I) in gas phase together with available experimental parameters. (Table S3, page S11)
19. Main geometrical parameters of **3** optimized by various functionals (PBE, TPSS and M06L) and basis set I (BS-I) in gas phase together with available experimental parameters. (Table S4, page S12)
20. Main geometrical parameters of **1** and **1F**. (Table S5, page S12)
21. Main geometrical parameters of **2** and **2F**. (Table S6, page S13)
22. Main geometrical parameters of **3** and **3F**. (Table S7, page S13)
23. Wiberg bond index (WBI) of **1-3** and their fluoride adducts. (Table S8, page S14)
24. Natural population of model systems **2<sub>mSi</sub>**, **2<sub>m</sub>**, **2<sub>mF</sub>**, **3<sub>m</sub>**, and **3<sub>mF</sub>**. (Table S9, page S14)
25. Absorption peaks, the oscillator strength, and assignments for **5**, **5F**, **6**, **6F**, **6CN**, **8**, and **8F**. (Table S10, page S15)
26. Cartesian coordinates of the optimized geometries. (page S16-S117)

### The computational strategy for optimizing the species in Table 2.

Usually, the position of a counter ion is flexible and the optimization of all possible positions is not easy. The molecular electrostatic potential (MEP) of the Pd complex suggests that the anion prefers to take a position close to the Sb center in **1**, **2** and **3** (Fig. S10). This is in agreement with the computed natural charges; the Sb has the largest positive charge,  $1.81e$  for **2** and  $1.73e$  for **3**, and the Pd-Cl moiety has a negative charge of  $-0.89e$  and  $-0.79e$  for **2** and **3**, respectively. Four most representative sites of  $[\text{BMe}_4]^-$  were examined to determine the position in **3**; see Fig. S11. The geometry optimization was carried out with the fixed geometry of the Pd moiety, where the PCM method was employed. In the most stable structure,  $[\text{BMe}_4]^-$  is anchored toward the opening place of the Sb center surrounded by three phenyl rings. This structure was employed for other complexes, where the geometry optimization was performed in the similar way. Also, the full geometry optimizations were performed on  $[\text{NMe}_4]\text{BMe}_4$  and  $[\text{NMe}_4]\text{F}$ . The relative stabilities of the optimized complexes were further refined by a single point calculation with the better basis set system BS-II.

### Why is the positive charge of the Sb center smaller in **2** and **3** than in **1**?

This is not surprising, as follows: In **2** and **3**, the neutral stibine group ( $\text{SbR}_3$ ) coordinates with the Pd center, in which the charge transfer (CT) occurs from the lone pair of  $\text{SbR}_3$  to the Pd center. As a result, the Sb center is more positively charged than in free  $\text{SbR}_3$ . In stibonium cation **1**, on the other hand, the Sb center is intrinsically more positively charged than those of **2** and **3**, because the positive charge tends to concentrate on the central Sb atom. Hence, the Sb center is more positively charged in **1** than in **2** and **3**.

### Absorption spectra of **2** and **2F**.

In **2**, all absorption peaks appear in a near ultraviolet region. Two strong absorption bands (383 and 315 nm) are mainly assigned to one-electron excitation from the HOMO to the LUMO and from the HOMO-2 to the LUMO, respectively. The HOMO and HOMO-2 mainly consist anti-bonding overlap between the Pd  $d_\pi$  and Cl  $p_\pi$  orbitals, where the Cl  $p_\pi$  component is larger than the Pd  $d_\pi$ , as shown in Fig. 4(A). The LUMO is the Pd  $d_\sigma$  anti-bonding MO between Pd  $d_\sigma$  and Sb lone pair orbitals, as expected. Thus, these transitions are assigned to ligand-field transitions (LFT) including a ligand-to-metal charge transfer (LMCT) character, where it is represented as LFT/LMCT. Additional weak absorption peaks at 360 and 353 nm mainly consist of one-electron excitations from the HOMO-1 to the LUMO and from the HOMO-3 to the LUMO. Though the HOMO-3 is similar to the HOMO-1, the mixing of  $d_\pi$  and  $p_\pi$  is different between them; see Scheme S1. The oscillator strength is considerably small. Hence, these are also assigned to LFT/LMCT, in which the LFT character is large. In the fluoride adduct **2F**, two large absorption bands disappear but one strong band appears around 330 nm, which includes one large (332 nm), two medium (302 and 348 nm), and one small (321 nm) absorption peaks. The strong absorption peak at 332 nm mainly consists of one-electron excitation from the HOMO-1 to the LUMO. As shown in Fig. 4(B), the LUMO is mainly constructed by the Pd  $d_\sigma$  orbital into which the Sb and Cl p orbitals mix in an anti-bonding way. The HOMO-1 is a  $d_\pi$ - $p_\pi$  anti-bonding MO. Thus, this absorption is assigned to LFT/LMCT. Other weak absorption peaks at 302, 321 and 348 are one-electron excitations of HOMO-2  $\rightarrow$  LUMO, HOMO-3  $\rightarrow$  LUMO, and HOMO  $\rightarrow$  LUMO, respectively. The HOMO mainly consists of the Pd  $d_\sigma$  orbital into which the Sb lone pair orbital mixes in a bonding way. The HOMO-2 is a  $d_\pi$ - $p_\pi$  anti-bonding MO. The HOMO-3 of **2F** corresponds to that of **2**. Thus, the lowest energy absorption at 348 nm is assigned to a Pd-based LFT, while other two higher energy absorptions at 321 and 302 nm are assigned to LFT/LMCT. It should be noted that all these new absorptions are found in a near UV region. Even though some electronic photodetectors are able to observe the spectral change in this region, the visible change is much better for easy detection of the fluoride anion.

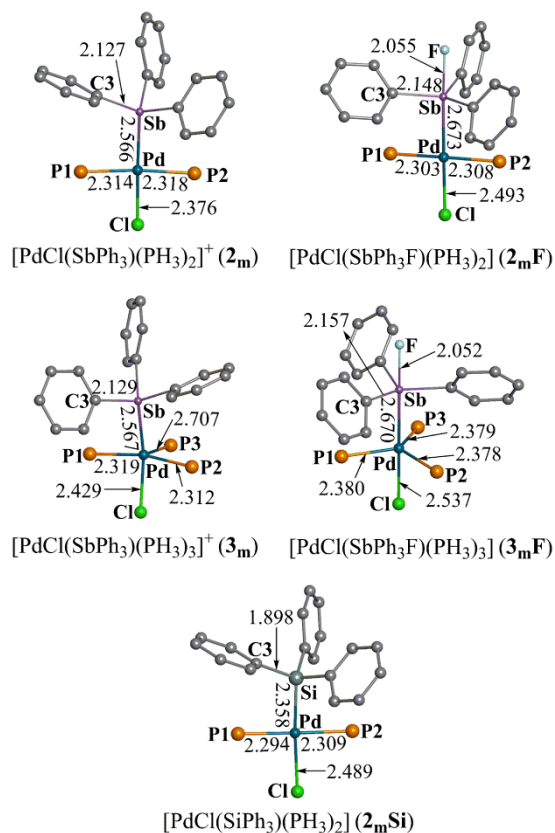

**Fig. S1** Optimized structures of model systems  $2_m$ ,  $2_m\text{F}$ ,  $3_m$ ,  $3_m\text{F}$  and  $2_m\text{Si}$  calculated at the PCM( $\text{CH}_2\text{Cl}_2$ )/PBE0/BS-II//PCM/PBE0/BS-I level. Hydrogen atoms of benzene rings and  $\text{PH}_3$  are omitted for clarity.

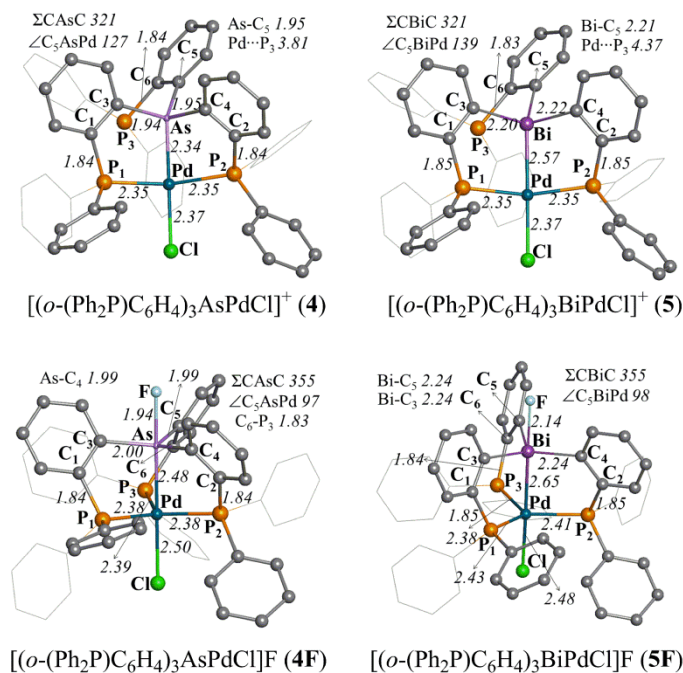

**Fig. S2** Optimized structures and selected geometric parameters of **4**, **4F**, **5**, and **5F** calculated at PCM( $\text{CH}_2\text{Cl}_2$ )/PBE0/BS-I level (bond lengths and angles in angstroms and degrees, respectively). Hydrogen atoms of benzene rings are omitted for clarity. Phenyl groups located at the back side are shown by faint black colors.

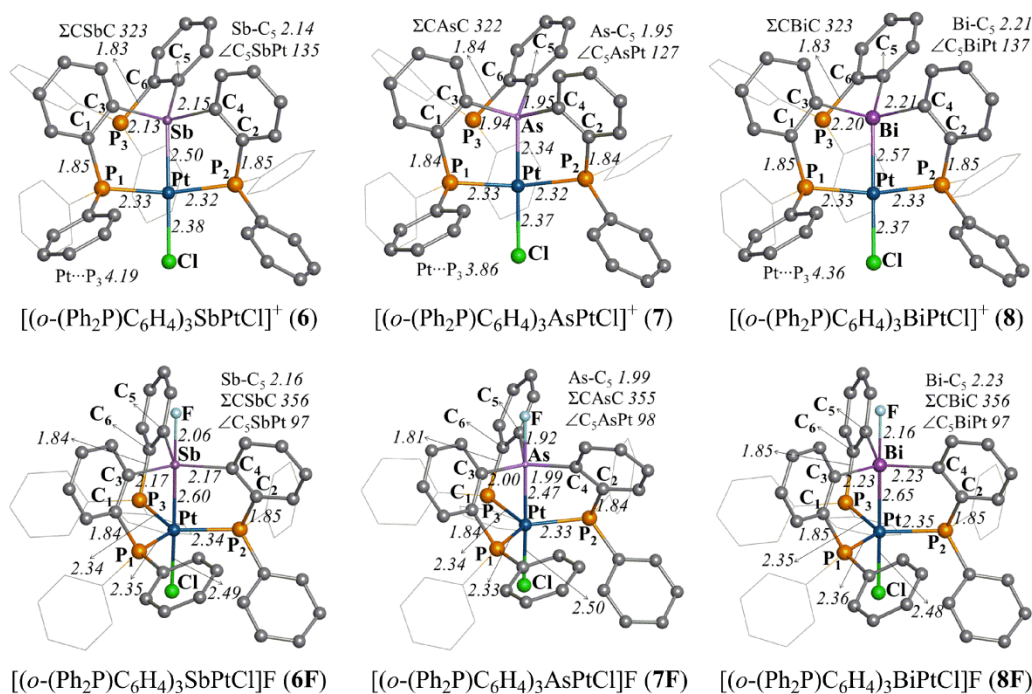

**Fig. S3** Optimized structures and selected geometric parameters of **6**, **6F**, **7**, **7F**, **8**, and **8F** calculated at PCM(CH<sub>2</sub>Cl<sub>2</sub>)/PBE0/BS-I level (bond lengths and angles in angstroms and degrees, respectively). Hydrogen atoms of benzene rings are omitted for clarity. Phenyl groups located at the back side are shown by faint black colors.

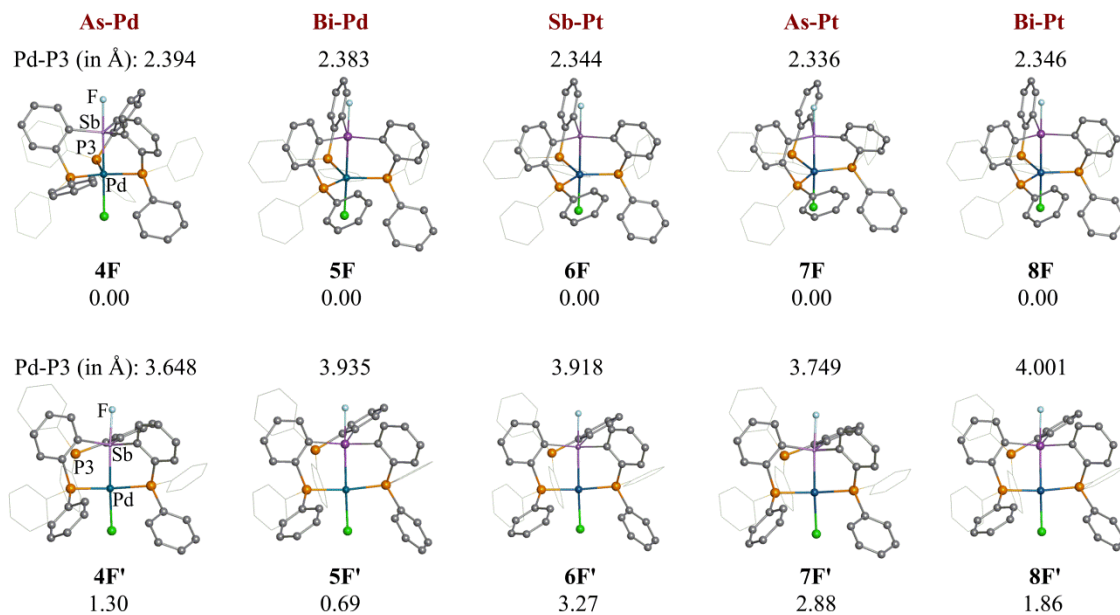

**Fig. S4** Optimized structures and relative energies (in kcal mol<sup>-1</sup>) of **4F-8F** and **4F'-8F'** calculated at PCM/PBE0/BS-II/PCM/PBE0/BS-I level (CH<sub>2</sub>Cl<sub>2</sub> as solvent). Hydrogen atoms of benzene rings are omitted for clarity. Phenyl groups located at the back side are shown by faint black colors.

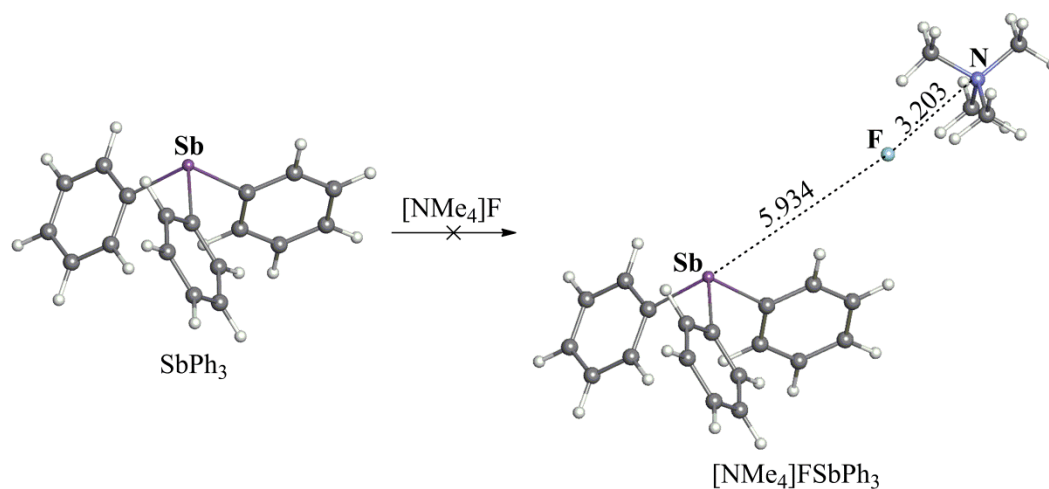

**Fig. S5** Optimized structures (bond lengths in angstroms) of  $\text{SbPh}_3$  and  $[\text{NMe}_4]\text{FSbPh}_3$  calculated at PCM/PBE0/BS-I level ( $\text{CH}_2\text{Cl}_2$  as solvent).

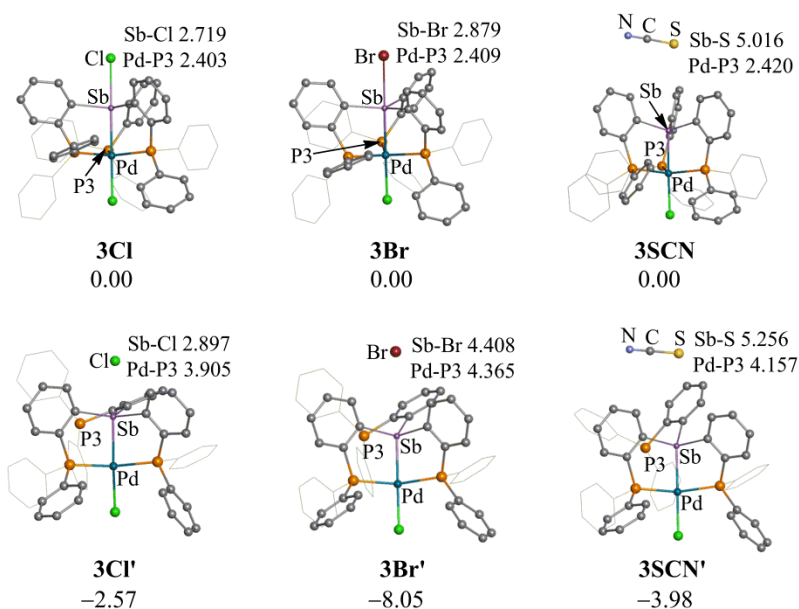

**Fig. S6** Optimized structures (in Å) and relative energies (in  $\text{kcal mol}^{-1}$ ) of **3Cl**, **3Cl'**, **3Br**, **3Br'**, **3SCN**, and **3SCN'** calculated at PCM/PBE0/BS-II//PCM/PBE0/BS-I level ( $\text{CH}_2\text{Cl}_2$  as solvent). Hydrogen atoms of benzene rings are omitted for clarity. Phenyl groups located at the back side are shown by faint black colors.

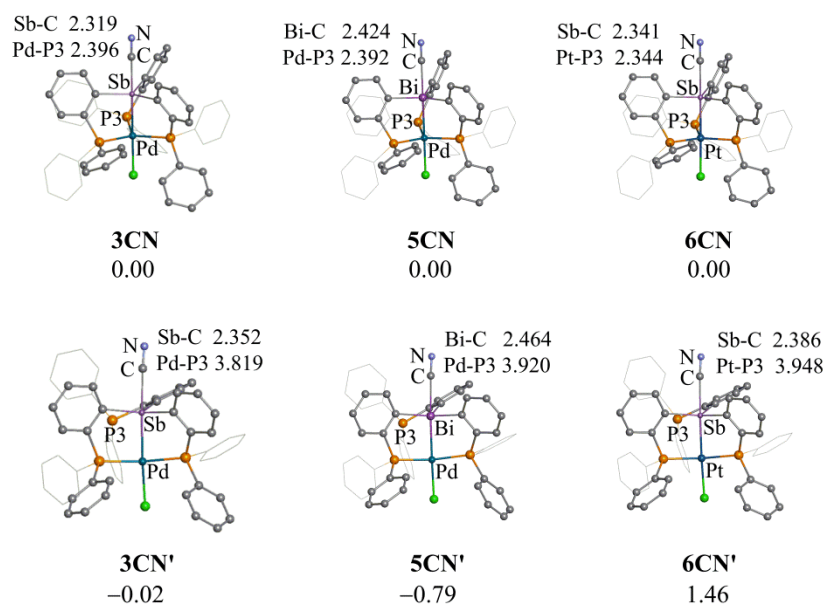

**Fig. S7** Optimized structures (in Å) and relative energies (in kcal mol<sup>-1</sup>) of **3CN**, **3CN'**, **5CN**, **5CN'**, **6CN**, and **6CN'** calculated at PCM/PBE0/BS-II//PCM/PBE0/BS-I level (CH<sub>2</sub>Cl<sub>2</sub> as solvent). In view of the very small energy difference between **3CN** and **3CN'**, the single point calculations were performed with ωB97XD functional to verify the credibility of the results. **3CN'** is still more stable than **3CN** by 0.86 kcal mol<sup>-1</sup> at PCM/ωB97XD/BS-II//PCM/PBE0/BS-I level (CH<sub>2</sub>Cl<sub>2</sub> as solvent). Hydrogen atoms of benzene rings are omitted for clarity. Phenyl groups located at the back side are shown by faint black colors.

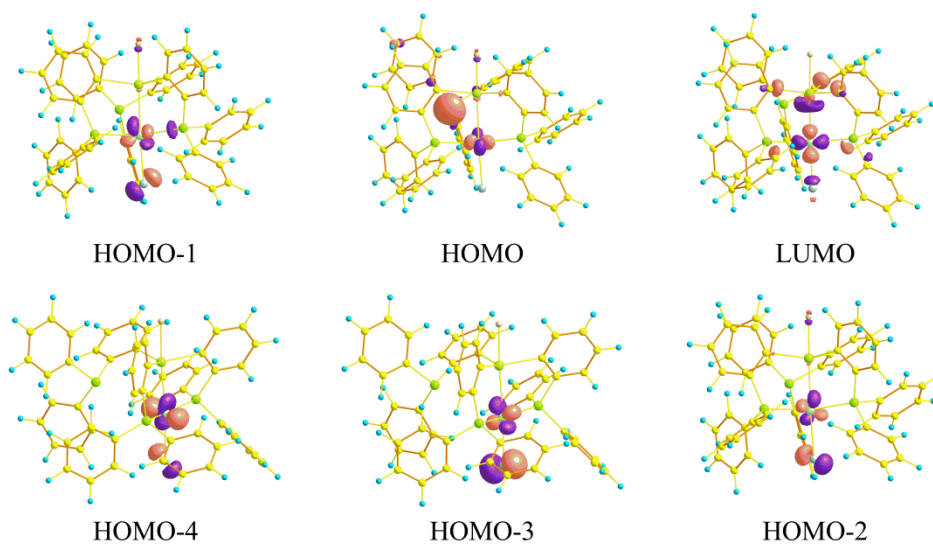

**Fig. S8** Molecular orbitals for **3F'** involved in the dominant electron transitions.

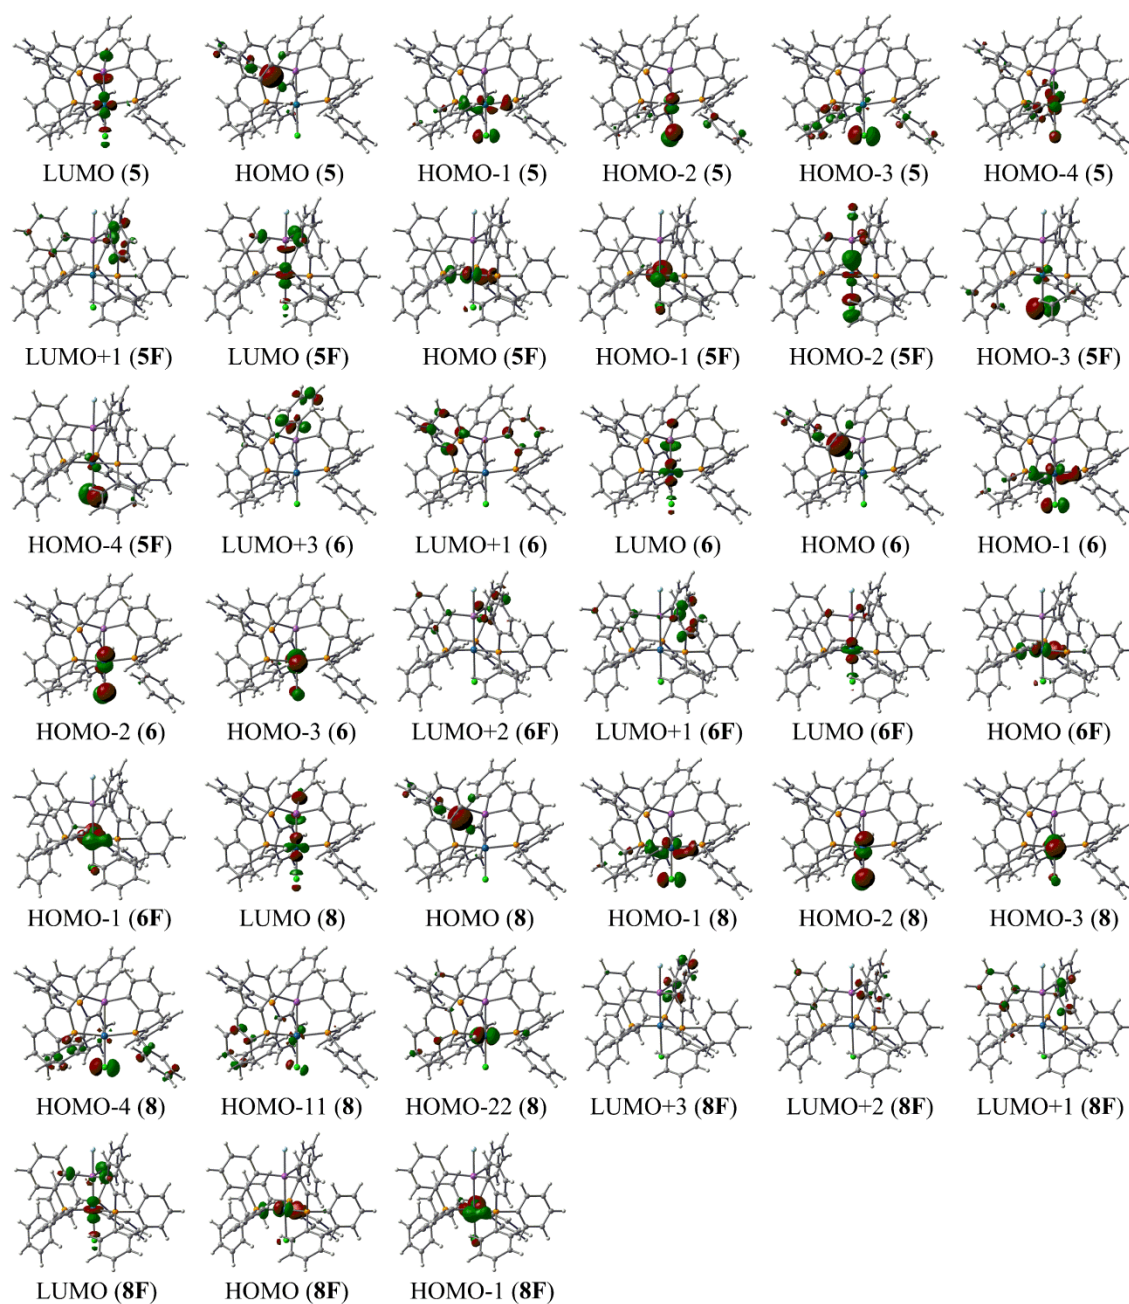

**Fig. S9** Molecular orbitals for **5**, **6**, **8** and their fluoride adducts involved in the dominant electron transitions.



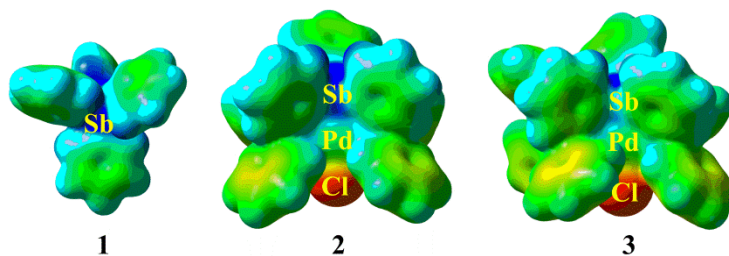

**Fig. S10** Electron density maps for the PCM/PBE0/BS-I optimized structures of 1-3 mapped with the electrostatic potential (Isoval = 0.004) from the total SCF density. The red areas represent regions of negative electrostatic potentials, and the blue areas identify regions of positive electrostatic potentials (electrophilic sites).

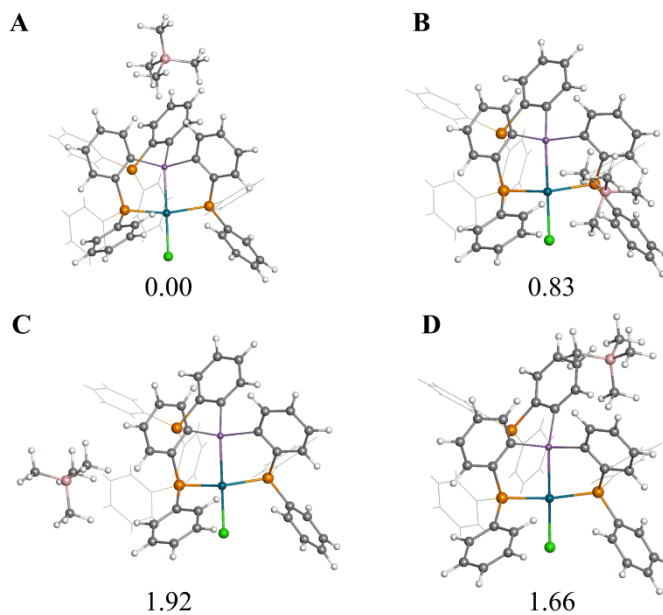

**Fig. S11** Optimized structures and relative energies (in kcal mol<sup>-1</sup>) for four isomers of 3[BMe<sub>4</sub>] calculated at PCM/PBE0/BS-II/PCM/PBE0/BS-I level (CH<sub>2</sub>Cl<sub>2</sub> as solvent). Phenyl groups located at the back side are shown by faint black colors.

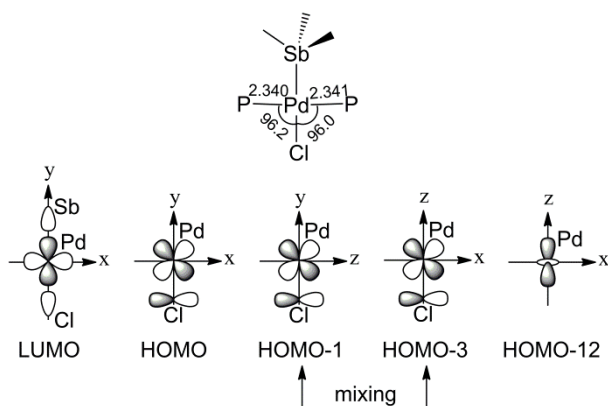

**Scheme S1.** Structure (bond lengths and angles in angstroms and degrees, respectively) and representations of five d orbitals for **2**.

**Table S1** Main geometrical parameters of **3** optimized by various functionals (PBE0, mPW1PW91, B3PW91 and B3LYP) and basis set I (BS-I) in gas phase together with available experimental parameters<sup>a</sup> (bond lengths and angles in angstroms and degrees, respectively)

|                                   | Expt.  | PBE0   |           | mPW1PW91 |           | B3PW91 |           | B3LYP  |           |
|-----------------------------------|--------|--------|-----------|----------|-----------|--------|-----------|--------|-----------|
|                                   | Length | Length | Deviation | Length   | Deviation | Length | Deviation | Length | Deviation |
| Sb-Pd                             | 2.469  | 2.512  | 0.043     | 2.514    | 0.045     | 2.519  | 0.05      | 2.539  | 0.07      |
| Sb-C <sub>3</sub>                 | 2.111  | 2.132  | 0.021     | 2.131    | 0.02      | 2.136  | 0.025     | 2.138  | 0.027     |
| Sb-C <sub>4</sub>                 | 2.135  | 2.154  | 0.019     | 2.152    | 0.017     | 2.157  | 0.022     | 2.158  | 0.023     |
| Sb-C <sub>5</sub>                 | 2.124  | 2.142  | 0.018     | 2.141    | 0.017     | 2.146  | 0.022     | 2.151  | 0.027     |
| Pd-Cl                             | 2.331  | 2.339  | 0.008     | 2.341    | 0.01      | 2.347  | 0.016     | 2.370  | 0.039     |
| Pd-P <sub>1</sub>                 | 2.328  | 2.344  | 0.016     | 2.348    | 0.02      | 2.353  | 0.025     | 2.379  | 0.051     |
| Pd-P <sub>2</sub>                 | 2.333  | 2.344  | 0.011     | 2.350    | 0.017     | 2.356  | 0.023     | 2.382  | 0.049     |
| P <sub>1</sub> -C <sub>1</sub>    | 1.835  | 1.851  | 0.016     | 1.852    | 0.017     | 1.856  | 0.021     | 1.864  | 0.029     |
| P <sub>2</sub> -C <sub>2</sub>    | 1.837  | 1.849  | 0.012     | 1.850    | 0.013     | 1.854  | 0.017     | 1.863  | 0.026     |
| P <sub>3</sub> -C <sub>6</sub>    | 1.829  | 1.832  | 0.003     | 1.833    | 0.004     | 1.837  | 0.008     | 1.848  | 0.019     |
| Pd...P                            | 4.149  | 4.232  | 0.083     | 4.279    | 0.13      | 4.316  | 0.167     | 4.433  | 0.284     |
| Sb-Pd-Cl                          | 174.17 | 177.86 | 3.69      | 178.39   | 4.22      | 178.43 | 4.26      | 178.02 | 3.85      |
| P <sub>1</sub> -Pd-P <sub>2</sub> | 159.44 | 160.78 | 1.34      | 160.50   | 1.06      | 160.02 | 0.58      | 160.55 | 1.11      |
| ΣC-Sb-C                           | 321.30 | 318.63 | -2.67     | 318.77   | -2.53     | 318.62 | -2.68     | 318.59 | -2.71     |

<sup>a</sup> Experimental data see Angew. Chem. Int. Ed. 2012, 51, 478-481.

**Table S2** Main geometrical parameters of **3** optimized by various functionals (TPSSh, M06, M062X and CAM-B3LYP) and basis set I (BS-I) in gas phase together with available experimental parameters<sup>a</sup> (bond lengths and angles in angstroms and degrees, respectively)

|                                   | Expt.  |        | TPSSh     |        | M06       |        | M062X     |        | CAM-B3LYP |  |
|-----------------------------------|--------|--------|-----------|--------|-----------|--------|-----------|--------|-----------|--|
|                                   | Length | Length | Deviation | Length | Deviation | Length | Deviation | Length | Deviation |  |
| Sb-Pd                             | 2.469  | 2.523  | 0.054     | 2.522  | 0.053     | 2.475  | 0.006     | 2.513  | 0.044     |  |
| Sb-C <sub>3</sub>                 | 2.111  | 2.140  | 0.029     | 2.127  | 0.016     | 2.113  | 0.002     | 2.123  | 0.012     |  |
| Sb-C <sub>4</sub>                 | 2.135  | 2.162  | 0.027     | 2.145  | 0.01      | 2.132  | -0.003    | 2.139  | 0.004     |  |
| Sb-C <sub>5</sub>                 | 2.124  | 2.151  | 0.027     | 2.131  | 0.007     | 2.115  | -0.009    | 2.133  | 0.009     |  |
| Pd-Cl                             | 2.331  | 2.351  | 0.02      | 2.373  | 0.042     | 2.402  | 0.071     | 2.348  | 0.017     |  |
| Pd-P <sub>1</sub>                 | 2.328  | 2.358  | 0.03      | 2.376  | 0.048     | 2.368  | 0.04      | 2.358  | 0.03      |  |
| Pd-P <sub>2</sub>                 | 2.333  | 2.360  | 0.027     | 2.372  | 0.039     | 2.383  | 0.05      | 2.359  | 0.026     |  |
| P <sub>1</sub> -C <sub>1</sub>    | 1.835  | 1.858  | 0.023     | 1.852  | 0.017     | 1.853  | 0.018     | 1.853  | 0.018     |  |
| P <sub>2</sub> -C <sub>2</sub>    | 1.837  | 1.857  | 0.02      | 1.849  | 0.012     | 1.854  | 0.017     | 1.853  | 0.016     |  |
| P <sub>3</sub> -C <sub>6</sub>    | 1.829  | 1.839  | 0.01      | 1.837  | 0.008     | 1.843  | 0.014     | 1.837  | 0.008     |  |
| Pd...P                            | 4.149  | 4.309  | 0.16      | 4.070  | -0.079    | 3.877  | -0.272    | 4.273  | 0.124     |  |
| Sb-Pd-Cl                          | 174.17 | 178.09 | 3.92      | 177.93 | 3.76      | 177.03 | 2.86      | 178.72 | 4.55      |  |
| P <sub>1</sub> -Pd-P <sub>2</sub> | 159.44 | 160.30 | 0.86      | 158.05 | -1.39     | 157.54 | -1.9      | 161.18 | 1.74      |  |
| ΣC-Sb-C                           | 321.30 | 317.98 | -3.32     | 322.25 | 0.95      | 317.40 | -3.9      | 320.72 | -0.58     |  |

<sup>a</sup> Experimental data see Angew. Chem. Int. Ed. 2012, 51, 478-481.

**Table S3** Main geometrical parameters of **3** optimized by various functionals (ωB97XD, BP86 and BLYP) and basis set I (BS-I) in gas phase together with available experimental parameters<sup>a</sup> (bond lengths and angles in angstroms and degrees, respectively)

|                                   | Expt.  |        | ωB97XD    |        | BP86      |        | BLYP      |  |
|-----------------------------------|--------|--------|-----------|--------|-----------|--------|-----------|--|
|                                   | Length | Length | Deviation | Length | Deviation | Length | Deviation |  |
| Sb-Pd                             | 2.469  | 2.496  | 0.027     | 2.538  | 0.069     | 2.564  | 0.095     |  |
| Sb-C <sub>3</sub>                 | 2.111  | 2.115  | 0.004     | 2.153  | 0.042     | 2.158  | 0.047     |  |
| Sb-C <sub>4</sub>                 | 2.135  | 2.134  | -0.001    | 2.175  | 0.04      | 2.180  | 0.045     |  |
| Sb-C <sub>5</sub>                 | 2.124  | 2.122  | -0.002    | 2.166  | 0.042     | 2.177  | 0.053     |  |
| Pd-Cl                             | 2.331  | 2.359  | 0.028     | 2.364  | 0.033     | 2.398  | 0.067     |  |
| Pd-P <sub>1</sub>                 | 2.328  | 2.361  | 0.033     | 2.362  | 0.034     | 2.401  | 0.073     |  |
| Pd-P <sub>2</sub>                 | 2.333  | 2.357  | 0.024     | 2.365  | 0.032     | 2.402  | 0.069     |  |
| P <sub>1</sub> -C <sub>1</sub>    | 1.835  | 1.851  | 0.016     | 1.870  | 0.035     | 1.882  | 0.047     |  |
| P <sub>2</sub> -C <sub>2</sub>    | 1.837  | 1.850  | 0.013     | 1.868  | 0.031     | 1.880  | 0.043     |  |
| P <sub>3</sub> -C <sub>6</sub>    | 1.829  | 1.833  | 0.004     | 1.850  | 0.021     | 1.865  | 0.036     |  |
| Pd...P                            | 4.149  | 3.964  | -0.185    | 4.354  | 0.205     | 4.506  | 0.357     |  |
| Sb-Pd-Cl                          | 174.17 | 177.74 | 3.57      | 178.41 | 4.24      | 178.33 | 4.16      |  |
| P <sub>1</sub> -Pd-P <sub>2</sub> | 159.44 | 158.92 | -0.52     | 160.30 | 0.86      | 159.95 | 0.51      |  |
| ΣC-Sb-C                           | 321.30 | 324.09 | 2.79      | 317.76 | -3.54     | 317.21 | -4.09     |  |

<sup>a</sup> Experimental data see Angew. Chem. Int. Ed. 2012, 51, 478-481.

**Table S4** Main geometrical parameters of **3** optimized by various functionals (PBE, TPSS and M06L) and basis set I (BS-I) in gas phase together with available experimental parameters<sup>a</sup> (bond lengths and angles in angstroms and degrees, respectively)

|                                   | Expt.  | PBE    |           | TPSS   |           | M06L   |           |
|-----------------------------------|--------|--------|-----------|--------|-----------|--------|-----------|
|                                   | Length | Length | Deviation | Length | Deviation | Length | Deviation |
| Sb-Pd                             | 2.469  | 2.534  | 0.065     | 2.532  | 0.063     | 2.507  | 0.038     |
| Sb-C <sub>3</sub>                 | 2.111  | 2.152  | 0.041     | 2.148  | 0.037     | 2.141  | 0.03      |
| Sb-C <sub>4</sub>                 | 2.135  | 2.174  | 0.039     | 2.171  | 0.036     | 2.156  | 0.021     |
| Sb-C <sub>5</sub>                 | 2.124  | 2.166  | 0.042     | 2.161  | 0.037     | 2.149  | 0.025     |
| Pd-Cl                             | 2.331  | 2.363  | 0.032     | 2.359  | 0.028     | 2.394  | 0.063     |
| Pd-P <sub>1</sub>                 | 2.328  | 2.359  | 0.031     | 2.363  | 0.035     | 2.375  | 0.047     |
| Pd-P <sub>2</sub>                 | 2.333  | 2.359  | 0.026     | 2.366  | 0.033     | 2.354  | 0.021     |
| P <sub>1</sub> -C <sub>1</sub>    | 1.835  | 1.866  | 0.031     | 1.864  | 0.029     | 1.846  | 0.011     |
| P <sub>2</sub> -C <sub>2</sub>    | 1.837  | 1.864  | 0.027     | 1.863  | 0.026     | 1.847  | 0.01      |
| P <sub>3</sub> -C <sub>6</sub>    | 1.829  | 1.843  | 0.014     | 1.845  | 0.016     | 1.833  | 0.004     |
| Pd...P                            | 4.149  | 4.298  | 0.149     | 4.335  | 0.186     | 3.890  | -0.259    |
| Sb-Pd-Cl                          | 174.17 | 178.77 | 4.6       | 178.10 | 3.93      | 177.64 | 3.47      |
| P <sub>1</sub> -Pd-P <sub>2</sub> | 159.44 | 160.36 | 0.92      | 160.09 | 0.65      | 160.83 | 1.39      |
| ΣC-Sb-C                           | 321.30 | 317.30 | -4.0      | 317.39 | -3.91     | 325.02 | 3.72      |

<sup>a</sup> Experimental data see Angew. Chem. Int. Ed. 2012, 51, 478-481.

**Table S5** Main geometrical parameters of **1** and **1F** optimized at PBE0/BS-I level together with available experimental parameters<sup>a</sup> (bond lengths and angles in angstroms and degrees, respectively)

|                   | <b>1</b> |           | <b>1F</b> |          |
|-------------------|----------|-----------|-----------|----------|
|                   | Calc.    | Expt.     | Calc.     | Dev.     |
| Sb-F              | -        | 2.0530(8) | 2.030     | -0.02308 |
| Sb-C <sub>1</sub> | 2.105    | 2.120(1)  | 2.138     | 0.0179   |
| Sb-C <sub>2</sub> | 2.105    | 2.134(1)  | 2.139     | 0.0049   |
| Sb-C <sub>3</sub> | 2.105    | 2.135(1)  | 2.151     | 0.0159   |
| Sb-C <sub>4</sub> | 2.105    | 2.183(1)  | 2.202     | 0.0189   |
| ΣC-Sb-C           | 328.44   | 356.81(3) | 357.77    | 0.957    |

<sup>a</sup> Experimental data see Russ. J. Coord. Chem. 2005, 31, 108-114.

**Table S6** Main geometrical parameters of **2** and **2F** optimized at PBE0/BS-I level together with available experimental parameters<sup>a</sup> (bond lengths and angles in angstroms and degrees, respectively)

|                                    | <b>2</b> |        |        | <b>2F</b> |        |        |
|------------------------------------|----------|--------|--------|-----------|--------|--------|
|                                    | Expt.    | Calc.  | Dev.   | Expt.     | Calc.  | Dev.   |
| Sb-Pd                              | 2.481    | 2.505  | 0.024  | 2.585     | 2.617  | 0.032  |
| Sb-F                               | -        | -      | -      | 2.051     | 2.037  | -0.014 |
| Sb-C <sub>3</sub>                  | 2.116    | 2.132  | 0.016  | 2.154     | 2.182  | 0.028  |
| Sb-C <sub>4</sub>                  | 2.129    | 2.132  | 0.003  | 2.162     | 2.182  | 0.020  |
| Sb-C <sub>5</sub>                  | 2.116    | 2.119  | 0.003  | 2.144     | 2.148  | 0.004  |
| Pd-Cl                              | 2.338    | 2.333  | -0.005 | 2.406     | 2.423  | 0.017  |
| Pd-P <sub>1</sub>                  | 2.310    | 2.338  | 0.028  | 2.305     | 2.302  | -0.003 |
| Pd-P <sub>2</sub>                  | 2.322    | 2.339  | 0.017  | 2.290     | 2.302  | 0.012  |
| P <sub>1</sub> -C <sub>1</sub>     | 1.831    | 1.850  | 0.019  | 1.831     | 1.835  | 0.004  |
| P <sub>2</sub> -C <sub>2</sub>     | 1.845    | 1.849  | 0.004  | 1.835     | 1.835  | 0.000  |
| ∠F-Sb-Pd                           | -        | -      | -      | 177.93    | 175.12 | -2.81  |
| ∠Sb-Pd-Cl                          | 176.69   | 179.46 | 2.77   | 173.43    | 173.27 | -0.14  |
| ∠P <sub>1</sub> -Pd-P <sub>2</sub> | 164.53   | 165.47 | 0.94   | 167.23    | 169.28 | 2.05   |
| ∑P-Pd-P                            | -        | -      | -      | -         | -      | -      |
| ∑C-Sb-C                            | 322.13   | 326.66 | 4.53   | 355.84    | 355.94 | 0.10   |

<sup>a</sup> Experimental data see Angew. Chem. Int. Ed. 2012, 51, 478-481.

**Table S7** Main geometrical parameters of **3** and **3F** optimized at PBE0/BS-I level together with available experimental parameters<sup>a</sup> (bond lengths and angles in angstroms and degrees, respectively)

|                                        | <b>3</b> |        |       | <b>3F</b> |        |       |
|----------------------------------------|----------|--------|-------|-----------|--------|-------|
|                                        | Expt.    | Calc.  | Dev.  | Expt.     | Calc.  | Dev.  |
| Sb-Pd                                  | 2.469    | 2.512  | 0.043 | 2.572     | 2.596  | 0.024 |
| Sb-F                                   | -        | -      | -     | 2.032     | 2.041  | 0.009 |
| Sb-C <sub>3</sub>                      | 2.111    | 2.132  | 0.021 | 2.149     | 2.176  | 0.027 |
| Sb-C <sub>4</sub>                      | 2.135    | 2.154  | 0.019 | 2.159     | 2.183  | 0.024 |
| Sb-C <sub>5</sub>                      | 2.124    | 2.142  | 0.018 | 2.138     | 2.180  | 0.042 |
| Pd-Cl                                  | 2.331    | 2.339  | 0.008 | 2.436     | 2.458  | 0.022 |
| Pd-P <sub>1</sub>                      | 2.328    | 2.344  | 0.016 | 2.332     | 2.419  | 0.087 |
| Pd-P <sub>2</sub>                      | 2.333    | 2.344  | 0.011 | 2.365     | 2.373  | 0.008 |
| Pd...P <sub>3</sub> /Pd-P <sub>3</sub> | 4.149    | 4.232  | 0.083 | 2.348     | 2.360  | 0.012 |
| P <sub>1</sub> -C <sub>1</sub>         | 1.835    | 1.851  | 0.016 | 1.821     | 1.841  | 0.020 |
| P <sub>2</sub> -C <sub>2</sub>         | 1.837    | 1.849  | 0.012 | 1.840     | 1.843  | 0.003 |
| P <sub>3</sub> -C <sub>6</sub>         | 1.829    | 1.832  | 0.003 | 1.831     | 1.838  | 0.007 |
| ∠F-Sb-Pd                               | -        | -      | -     | 177.59    | 178.49 | 0.90  |
| ∠Sb-Pd-Cl                              | 174.17   | 177.86 | 3.69  | 176.13    | 175.52 | -0.61 |
| ∠P <sub>1</sub> -Pd-P <sub>2</sub>     | 159.44   | 160.78 | 1.34  | -         | -      | -     |
| ∑P-Pd-P                                | -        | -      | -     | 357.58    | 358.86 | 1.28  |
| ∑C-Sb-C                                | 321.30   | 318.63 | -2.67 | 356.02    | 354.75 | -1.27 |

<sup>a</sup> Experimental data see Angew. Chem. Int. Ed. 2012, 51, 478-481.

**Table S8** Wiberg bond index (WBI) of **1-3** and their fluoride adducts

|                   | <b>1</b> | <b>1F</b> | <b>2</b> | <b>2F</b> | <b>3</b> | <b>3F</b> |
|-------------------|----------|-----------|----------|-----------|----------|-----------|
| Sb-F              |          | 0.31      |          | 0.30      |          | 0.30      |
| Sb-C <sub>1</sub> | 0.81     | 0.73      |          |           |          |           |
| Sb-C <sub>2</sub> | 0.81     | 0.75      |          |           |          |           |
| Sb-C <sub>3</sub> | 0.81     | 0.73      | 0.77     | 0.68      | 0.75     | 0.69      |
| Sb-C <sub>4</sub> | 0.81     | 0.63      | 0.77     | 0.68      | 0.72     | 0.68      |
| Sb-C <sub>5</sub> |          |           | 0.79     | 0.72      | 0.76     | 0.69      |
| Sb-Pd             |          |           | 0.66     | 0.56      | 0.61     | 0.57      |
| Pd-P <sub>1</sub> |          |           | 0.58     | 0.56      | 0.53     | 0.60      |
| Pd-P <sub>2</sub> |          |           | 0.58     | 0.56      | 0.54     | 0.60      |
| Pd-P <sub>3</sub> |          |           |          |           |          | 0.61      |
| Pd-Cl             |          |           | 0.64     | 0.49      | 0.60     | 0.56      |

**Table S9** Natural population of model systems **2<sub>mSi</sub>**, **2<sub>m</sub>**, **2<sub>mF</sub>**, **3<sub>m</sub>**, and **3<sub>mF</sub>**<sup>a</sup>

|                       |       | <b>2<sub>mSi</sub></b> | <b>2<sub>m</sub></b> | <b>2<sub>mF</sub></b> | <b>3<sub>m</sub></b> | <b>3<sub>mF</sub></b> |
|-----------------------|-------|------------------------|----------------------|-----------------------|----------------------|-----------------------|
| Pd                    | s     | 8.501                  | 8.540                | 8.551                 | 8.522                | 8.483                 |
|                       | p     | 18.572                 | 18.665               | 18.605                | 19.065               | 19.142                |
|                       | d     | 19.421                 | 19.344               | 19.424                | 19.334               | 19.420                |
|                       | total | 46.495                 | 46.549               | 46.581                | 46.922               | 47.045                |
| Si/Sb                 | s     | 4.857                  | 9.205                | 9.143                 | 9.186                | 9.117                 |
|                       | p     | 7.576                  | 19.977               | 19.705                | 19.934               | 19.613                |
|                       | d     |                        | 20.008               | 20.010                | 20.007               | 20.010                |
|                       | total | 12.458                 | 49.190               | 48.857                | 49.127               | 48.740                |
| Ph1 <sup>b</sup>      |       | 41.472                 | 41.324               | 41.377                | 41.333               | 41.373                |
| P1 (PH <sub>3</sub> ) |       | 14.716 (17.534)        | 14.705 (17.456)      | 14.748 (17.567)       | 14.662 (17.426)      | 14.774 (17.620)       |
| P2 (PH <sub>3</sub> ) |       | 14.730 (17.542)        | 14.718 (17.463)      | 14.749 (17.568)       | 14.645 (17.412)      | 14.772 (17.618)       |
| P3 (PH <sub>3</sub> ) |       |                        |                      |                       | 14.915 (17.746)      | 14.772 (17.618)       |
| Cl                    |       | 17.557                 | 17.372               | 17.541                | 17.367               | 17.489                |
| F                     |       |                        |                      | 9.755                 |                      | 9.752                 |

<sup>a</sup> The PCM(CH<sub>2</sub>Cl<sub>2</sub>)/PBE0/BS-I geometries. <sup>b</sup> Average value of Ph1, Ph2 and Ph3.

**Table S10** Absorption peaks ( $\lambda_{\text{abs}}$ ) [in eV (nm)], the oscillator strength ( $f$ ), and assignments for **5**, **5F**, **6**, **6F**, **6CN**, **8**, and **8F** at the PCM(CH<sub>2</sub>Cl<sub>2</sub>)/TD-PBE0/BS-II level

| systems    | $\lambda_{\text{abs}}$ | major contributions                                                             | $f$    | assignments |
|------------|------------------------|---------------------------------------------------------------------------------|--------|-------------|
| <b>5</b>   | 2.89 (429)             | H-1 $\rightarrow$ L <sup>a</sup> (82%)                                          | 0.1004 | LFT/LMCT    |
|            | 2.97 (418)             | H $\rightarrow$ L (69%) H-4 $\rightarrow$ L (14%)                               | 0.1259 | LMCT        |
|            | 3.16 (393)             | H-2 $\rightarrow$ L (58%) H-4 $\rightarrow$ L (20%)                             | 0.0010 | LFT/LMCT    |
|            | 3.23 (384)             | H-4 $\rightarrow$ L (40%) H $\rightarrow$ L (28%) H-2 $\rightarrow$ L (10%)     | 0.0147 | LFT/LMCT    |
|            | 3.59 (346)             | H-3 $\rightarrow$ L (63%)                                                       | 0.0866 | LMCT        |
| <b>5F</b>  | 2.27 (546)             | H $\rightarrow$ L (97%)                                                         | 0.0582 | LFT/LMCT    |
|            | 2.45 (507)             | H-1 $\rightarrow$ L (97%)                                                       | 0.0603 | LFT/LMCT    |
|            | 3.51 (354)             | H-3 $\rightarrow$ L (81%)                                                       | 0.0016 | LMCT/LFT    |
|            | 3.55 (350)             | H-4 $\rightarrow$ L (71%)                                                       | 0.0123 | LMCT/LFT    |
|            | 3.60 (345)             | H-2 $\rightarrow$ L (52%) H $\rightarrow$ L+1 (31%)                             | 0.1131 | LMCT/LFT    |
| <b>6</b>   | 3.53 (351)             | H $\rightarrow$ L (38%) H-1 $\rightarrow$ L (32%) H-3 $\rightarrow$ L (18%)     | 0.0802 | LMCT/LFT    |
|            | 3.56 (348)             | H-1 $\rightarrow$ L (55%) H $\rightarrow$ L (19%) H-3 $\rightarrow$ L (14%)     | 0.1304 | LFT/LMCT    |
|            | 3.72 (334)             | H-2 $\rightarrow$ L (74%)                                                       | 0.0123 | LFT/LMCT    |
|            | 3.81 (325)             | H-3 $\rightarrow$ L (48%) H $\rightarrow$ L (36%)                               | 0.0488 | LFT/LMCT    |
|            | 4.14 (300)             | H $\rightarrow$ L+3 (75%) H $\rightarrow$ L+1 (10%)                             | 0.0282 | LLCT        |
| <b>6F</b>  | 2.93 (423)             | H $\rightarrow$ L (93%)                                                         | 0.0972 | LFT/LMCT    |
|            | 3.10 (400)             | H-1 $\rightarrow$ L (93%)                                                       | 0.0720 | LFT/LMCT    |
|            | 3.49 (355)             | H $\rightarrow$ L+1 (84%) H $\rightarrow$ L+2 (13%)                             | 0.0144 | MLCT        |
|            | 3.53 (351)             | H $\rightarrow$ L+2 (84%) H $\rightarrow$ L+1 (13%)                             | 0.0075 | MLCT        |
|            | 3.67 (338)             | H-1 $\rightarrow$ L+1 (92%)                                                     | 0.0031 | MLCT        |
| <b>6CN</b> | 2.93 (423)             | H $\rightarrow$ L (94%)                                                         | 0.0972 | LFT/LMCT    |
|            | 3.02 (411)             | H-1 $\rightarrow$ L (95%)                                                       | 0.0720 | LFT/LMCT    |
|            | 3.43 (362)             | H $\rightarrow$ L+1 (95%)                                                       | 0.0144 | MLCT        |
|            | 3.49 (356)             | H $\rightarrow$ L+2 (93%)                                                       | 0.0075 | MLCT        |
|            | 3.55 (349)             | H-1 $\rightarrow$ L+1 (95%)                                                     | 0.0031 | MLCT        |
| <b>8</b>   | 3.36 (369)             | H-1 $\rightarrow$ L (60%) H-3 $\rightarrow$ L (15%) H $\rightarrow$ L (14%)     | 0.0446 | LFT/LMCT    |
|            | 3.39 (366)             | H-3 $\rightarrow$ L (31%) H-1 $\rightarrow$ L (28%) H $\rightarrow$ L (28%)     | 0.1057 | LFT/LMCT    |
|            | 3.50 (354)             | H-2 $\rightarrow$ L (84%)                                                       | 0.0081 | LFT/LMCT    |
|            | 3.61 (344)             | H $\rightarrow$ L (54%) H-3 $\rightarrow$ L (38%)                               | 0.0473 | LMCT/LFT    |
|            | 4.08 (304)             | H-4 $\rightarrow$ L (40%) H-11 $\rightarrow$ L (16%) H-22 $\rightarrow$ L (13%) | 0.0128 | LMCT        |
| <b>8F</b>  | 2.57 (482)             | H $\rightarrow$ L (97%)                                                         | 0.0510 | LFT/LMCT    |
|            | 2.77 (447)             | H-1 $\rightarrow$ L (97%)                                                       | 0.0454 | LFT/LMCT    |
|            | 3.55 (349)             | H $\rightarrow$ L+1 (94%)                                                       | 0.0316 | MLCT        |
|            | 3.61 (344)             | H $\rightarrow$ L+2 (94%)                                                       | 0.0101 | MLCT        |
|            | 3.74 (331)             | H $\rightarrow$ L+3 (48%) H-1 $\rightarrow$ L+1 (41%)                           | 0.0027 | MLCT        |

<sup>a</sup> H and L represent HOMO and LUMO, respectively.

XYZ coordinates of the optimized structure of **1**

45

|    |               |               |               |
|----|---------------|---------------|---------------|
| C  | -0.0086442444 | 0.045911354   | -2.1036349613 |
| C  | 1.2025510244  | 0.0324193263  | -2.802253865  |
| H  | 2.1529354422  | 0.0286501685  | -2.2739324171 |
| C  | 1.1869063889  | 0.0358149954  | -4.1938191328 |
| H  | 2.1238283289  | 0.0286740015  | -4.742791905  |
| C  | -0.0260701215 | 0.0528356726  | -4.8789005061 |
| H  | -0.0324881911 | 0.0566979756  | -5.9649326513 |
| C  | -1.2308950636 | 0.0711316211  | -4.1796864635 |
| H  | -2.1743255596 | 0.0909596673  | -4.7172049675 |
| C  | -1.2295001511 | 0.0695116563  | -2.7876285998 |
| H  | -2.1742475981 | 0.0991479439  | -2.2495736754 |
| C  | -1.5606219771 | 1.2386593872  | 0.6793747135  |
| C  | -1.8283566158 | 2.4403295773  | 0.0135748843  |
| H  | -1.2649563256 | 2.73030386    | -0.8704258372 |
| C  | -2.8438878757 | 3.2683596782  | 0.4835952851  |
| H  | -3.0582871587 | 4.2015324319  | -0.0288522543 |
| C  | -3.5847764799 | 2.8974975625  | 1.6035963235  |
| H  | -4.3776218576 | 3.5458794236  | 1.9648656502  |
| C  | -3.3190844882 | 1.6973677775  | 2.2592816026  |
| H  | -3.9036714828 | 1.4087337653  | 3.1277260221  |
| C  | -2.3055923253 | 0.861063149   | 1.8008437532  |
| H  | -2.1099823516 | -0.0785506581 | 2.3119326621  |
| C  | -0.2751230836 | -1.9681864013 | 0.6903152541  |
| C  | -0.8693548354 | -2.9178955482 | -0.1464589368 |
| H  | -1.1659744357 | -2.6620797798 | -1.1608167322 |
| C  | -1.0715283674 | -4.211270311  | 0.3258587686  |
| H  | -1.5295074236 | -4.9547078349 | -0.3197453604 |
| C  | -0.6836837903 | -4.5511574369 | 1.6200397786  |
| H  | -0.8426556138 | -5.5623156638 | 1.9830939141  |
| C  | -0.0876181693 | -3.6037545995 | 2.4494905218  |
| H  | 0.2192815776  | -3.8741475828 | 3.4555132358  |
| C  | 0.1218694463  | -2.3068692358 | 1.9890652893  |
| H  | 0.6015178423  | -1.5776934336 | 2.6380688215  |
| C  | 1.849888071   | 0.6882818147  | 0.7363493422  |
| C  | 2.9371037161  | -0.1909699096 | 0.798009447   |
| H  | 2.8339699139  | -1.233152432  | 0.5044709028  |
| C  | 4.1654197978  | 0.275085507   | 1.2583086297  |
| H  | 5.0130167786  | -0.4018550491 | 1.3103825203  |
| C  | 4.3037466805  | 1.6032713765  | 1.655262187   |
| H  | 5.2635245003  | 1.9614121858  | 2.0159300272  |
| C  | 3.2171110621  | 2.4732713465  | 1.5983088228  |
| H  | 3.3274736918  | 3.5059944387  | 1.915406625   |
| C  | 1.9839582721  | 2.0207258006  | 1.1386977523  |
| H  | 1.1378147997  | 2.7028780042  | 1.1059651323  |
| Sb | 0.001138252   | 0.0013144073  | 0.0008403962  |



XYZ coordinates of the optimized structure of **1F**

46

|    |               |               |               |
|----|---------------|---------------|---------------|
| C  | -1.8435576069 | 1.077421645   | 0.2671688376  |
| C  | -2.7530349018 | 0.6570775118  | 1.2423515855  |
| H  | -2.5250486984 | -0.2009752521 | 1.8664963493  |
| C  | -3.9494194019 | 1.347052705   | 1.4231032211  |
| H  | -4.6570167463 | 1.0097089566  | 2.1757316661  |
| C  | -4.2343783903 | 2.4702116241  | 0.6488429444  |
| H  | -5.1645441307 | 3.0118545461  | 0.7980606669  |
| C  | -3.3258086902 | 2.8987412711  | -0.3155441657 |
| H  | -3.541331857  | 3.7766373609  | -0.9185750404 |
| C  | -2.1368268502 | 2.1987109876  | -0.513990808  |
| H  | -1.4471638869 | 2.5316848454  | -1.2855567104 |
| C  | 0.0199284499  | 0.2198093789  | -2.1941766285 |
| C  | -1.176352488  | 0.1612122849  | -2.921200958  |
| H  | -2.1303477602 | 0.111267567   | -2.4007340102 |
| C  | -1.1706288975 | 0.1684650671  | -4.3151960187 |
| H  | -2.110328468  | 0.126561131   | -4.8601541221 |
| C  | 0.0369949826  | 0.2284218435  | -5.0073546254 |
| H  | 0.0434366404  | 0.2354048102  | -6.0941474395 |
| C  | 1.2361429247  | 0.2751016333  | -4.3002485464 |
| H  | 2.1826230889  | 0.3166744311  | -4.8333794815 |
| C  | 1.2254012291  | 0.2675449973  | -2.9057797311 |
| H  | 2.1732917823  | 0.300530335   | -2.373412461  |
| C  | 1.8284128582  | 1.101000852   | 0.3077854393  |
| C  | 2.0960574345  | 2.2662511205  | -0.416009653  |
| H  | 1.3942422357  | 2.6283018745  | -1.1633419025 |
| C  | 3.2747510561  | 2.9753637378  | -0.1900269621 |
| H  | 3.4707802439  | 3.886791229   | -0.748295909  |
| C  | 4.1979845495  | 2.5133749342  | 0.7446012206  |
| H  | 5.1201367811  | 3.0624280745  | 0.914882951   |
| C  | 3.9379028393  | 1.3474462982  | 1.4623094788  |
| H  | 4.656740373   | 0.9843273099  | 2.1919278842  |
| C  | 2.7521162667  | 0.6470106372  | 1.2539452469  |
| H  | 2.5442496811  | -0.2461337016 | 1.8348709563  |
| C  | 0.0223152941  | -2.1070315569 | 0.0069218524  |
| C  | -0.056681936  | -2.8170643064 | 1.2107886433  |
| H  | -0.1225627248 | -2.2759963694 | 2.1472823824  |
| C  | -0.0475019513 | -4.2100897847 | 1.200574073   |
| H  | -0.1109295388 | -4.7538293929 | 2.1394741491  |
| C  | 0.043505373   | -4.9038741425 | -0.0040120133 |
| H  | 0.0514831537  | -5.9905962317 | -0.0079633197 |
| C  | 0.1246637226  | -4.201038509  | -1.2032700408 |
| H  | 0.1970199261  | -4.7356186799 | -2.1466287924 |
| C  | 0.1124373015  | -2.8074906655 | -1.2004770263 |
| H  | 0.1739717934  | -2.2743165612 | -2.1440459687 |
| Sb | 0.0028470712  | 0.0374925945  | -0.0099024116 |
| F  | -0.0158821277 | -0.1158614412 | 2.0462731982  |

XYZ coordinates of the optimized structure of [1]BMe<sub>4</sub>

62

|    |               |               |               |
|----|---------------|---------------|---------------|
| C  | 0.0368755755  | 0.0444892302  | -2.0881722194 |
| C  | 1.2461775206  | -0.0774469899 | -2.7797456549 |
| H  | 2.1896936581  | -0.1677683972 | -2.2479524451 |
| C  | 1.2388502618  | -0.0694722854 | -4.1715260135 |
| H  | 2.1751966976  | -0.1577563999 | -4.7142148983 |
| C  | 0.0364795649  | 0.0612572303  | -4.8634906279 |
| H  | 0.0371632128  | 0.0728517941  | -5.949512375  |
| C  | -1.1653696177 | 0.1867363986  | -4.170455081  |
| H  | -2.1002266819 | 0.2968906226  | -4.7117459423 |
| C  | -1.1723298713 | 0.1804763374  | -2.7780192766 |
| H  | -2.1132007449 | 0.2922919194  | -2.2456462866 |
| C  | -1.5280153683 | 1.2515691704  | 0.6944062822  |
| C  | -1.7775691146 | 2.4689622605  | 0.0525674453  |
| H  | -1.189761589  | 2.7928543858  | -0.8025183783 |
| C  | -2.8053085501 | 3.2854731041  | 0.5183607856  |
| H  | -2.9987945389 | 4.2325607558  | 0.0236138313  |
| C  | -3.5758176232 | 2.8875716218  | 1.6083569021  |
| H  | -4.3771571279 | 3.527649271   | 1.9661352641  |
| C  | -3.3262639314 | 1.6706141521  | 2.240381923   |
| H  | -3.9312370548 | 1.3597106544  | 3.0870216635  |
| C  | -2.3009768446 | 0.8456723757  | 1.7868996362  |
| H  | -2.1178593302 | -0.1049337542 | 2.281047333   |
| C  | -0.2663756053 | -1.9560553998 | 0.6971914712  |
| C  | -0.7849156654 | -2.9118529548 | -0.1817322649 |
| H  | -1.0151575828 | -2.655142359  | -1.2125538931 |
| C  | -1.0021901257 | -4.2105373378 | 0.2704511616  |
| H  | -1.4025605973 | -4.9565215331 | -0.4096390964 |
| C  | -0.7038410397 | -4.5509022697 | 1.5882313764  |
| H  | -0.8738792483 | -5.5656887057 | 1.9361528031  |
| C  | -0.184094027  | -3.5972214503 | 2.4609830304  |
| H  | 0.0520369711  | -3.8650104504 | 3.4865774101  |
| C  | 0.0390986896  | -2.2952700413 | 2.0201957233  |
| H  | 0.4554558741  | -1.5620488901 | 2.7064117271  |
| C  | 1.906649709   | 0.6547688553  | 0.7569845272  |
| C  | 2.9109850751  | -0.2919904327 | 0.9849892122  |
| H  | 2.734782282   | -1.3503467285 | 0.8111687863  |
| C  | 4.1542915576  | 0.1302970831  | 1.4490365275  |
| H  | 4.9372747222  | -0.6006418694 | 1.6281419466  |
| C  | 4.3896977825  | 1.4833086606  | 1.6824827296  |
| H  | 5.3611130827  | 1.8083611873  | 2.0437663303  |
| C  | 3.3851311011  | 2.4218987043  | 1.4554187585  |
| H  | 3.5694469777  | 3.4767360877  | 1.6356336401  |
| C  | 2.1373945694  | 2.0135018752  | 0.9931746461  |
| H  | 1.3646886606  | 2.7577894573  | 0.8196236209  |
| Sb | 0.0387281197  | 0.0163559758  | 0.017150362   |
| B  | 0.8059661376  | 5.3894049807  | -2.5513032266 |
| C  | -0.6437223742 | 4.8703424299  | -3.1466943058 |

|   |               |              |               |
|---|---------------|--------------|---------------|
| C | 1.1333515079  | 6.8962322286 | -3.1380277076 |
| C | 0.734269712   | 5.4511556721 | -0.9027580779 |
| C | 1.9963162168  | 4.3432610722 | -3.0129038264 |
| H | 2.0926954736  | 7.3005599839 | -2.7698413101 |
| H | 0.3654044015  | 7.640051322  | -2.8619274059 |
| H | 1.1966448694  | 6.9211155353 | -4.2399342374 |
| H | -0.8990527175 | 3.8427313894 | -2.8283290878 |
| H | -0.6710385288 | 4.8522334524 | -4.250366341  |
| H | -1.490626561  | 5.5062837816 | -2.832947011  |
| H | 2.9919712166  | 4.6280019086 | -2.6290081471 |
| H | 2.1029443692  | 4.2721551443 | -4.1098647702 |
| H | 1.8219856803  | 3.3103593896 | -2.6614284269 |
| H | 1.6830823316  | 5.7793243259 | -0.4429775426 |
| H | 0.5013020302  | 4.4704141524 | -0.4499125834 |
| H | -0.0408385105 | 6.1438825071 | -0.5296934929 |

XYZ coordinates of the optimized structure of **2**

80

|    |               |               |               |
|----|---------------|---------------|---------------|
| Pd | -0.0079825606 | -0.0008888095 | -0.0076489502 |
| P  | -2.3189895997 | 0.2992239914  | 0.2187736551  |
| Cl | 0.0012058721  | -0.0696400373 | -2.3872483556 |
| Sb | -0.0076925226 | 0.0094246172  | 2.4946502687  |
| P  | 2.3156940387  | 0.1037192612  | 0.2512302872  |
| C  | -1.8313721509 | 1.0317670328  | 2.9131602735  |
| C  | -2.7207563416 | 1.1071360884  | 1.8265143921  |
| C  | -3.9400537665 | 1.7745494498  | 1.9915163255  |
| H  | -4.6309182222 | 1.8581890441  | 1.1569121014  |
| C  | -4.2712602956 | 2.336829427   | 3.2211648819  |
| H  | -5.2184573351 | 2.8551952174  | 3.3361142674  |
| C  | -3.396387226  | 2.2332779877  | 4.2996885513  |
| H  | -3.6579958209 | 2.6710914638  | 5.2583919175  |
| C  | -2.1766894085 | 1.5772340088  | 4.1504545039  |
| H  | -1.504444912  | 1.5065182472  | 5.0004916833  |
| C  | -3.232594422  | -1.2755795559 | 0.1881139576  |
| C  | -2.8790043546 | -2.1991868943 | -0.8061005654 |
| H  | -2.0917514964 | -1.9559342108 | -1.5167332196 |
| C  | -3.5375855794 | -3.4216770979 | -0.882251166  |
| H  | -3.2643908833 | -4.1321494547 | -1.6570921177 |
| C  | -4.5372654822 | -3.7365177651 | 0.0374476578  |
| H  | -5.0449165813 | -4.6951390736 | -0.0198661438 |
| C  | -4.8831400811 | -2.8247687564 | 1.031571456   |
| H  | -5.6603821881 | -3.0686182261 | 1.7500854332  |
| C  | -4.235854724  | -1.5932579981 | 1.1095497525  |
| H  | -4.5145576195 | -0.8876925339 | 1.8869322751  |
| C  | -3.0680942319 | 1.3809038464  | -1.035499209  |
| C  | -2.4227927093 | 2.5863269405  | -1.3401022957 |
| H  | -1.4814525962 | 2.8390120596  | -0.8572680652 |
| C  | -2.9800233425 | 3.4553714337  | -2.2703709011 |
| H  | -2.4766846474 | 4.3886475731  | -2.5054868279 |

|   |               |               |               |
|---|---------------|---------------|---------------|
| C | -4.1744571094 | 3.1221638668  | -2.9096526553 |
| H | -4.604305509  | 3.7996965281  | -3.6418354179 |
| C | -4.8118253825 | 1.9200507494  | -2.6162241343 |
| H | -5.739461388  | 1.6566766536  | -3.1160846442 |
| C | -4.2623854488 | 1.0463226026  | -1.6796143551 |
| H | -4.7624610087 | 0.108490166   | -1.4551298691 |
| C | 1.8264159803  | 1.0239985624  | 2.8850646822  |
| C | 2.7321530838  | 1.0024159185  | 1.8078653522  |
| C | 3.9642516364  | 1.6513087823  | 1.9437845582  |
| H | 4.6677232774  | 1.6609167325  | 1.1156528417  |
| C | 4.2904721653  | 2.2964599099  | 3.1341440158  |
| H | 5.2474362213  | 2.8014504895  | 3.2252981815  |
| C | 3.3964367841  | 2.2969423811  | 4.20105877    |
| H | 3.6514549983  | 2.804123118   | 5.1267406205  |
| C | 2.164027047   | 1.6574737639  | 4.0813989511  |
| H | 1.4742181944  | 1.6740862632  | 4.9199911202  |
| C | 3.0960933944  | -1.5361670447 | 0.3738593616  |
| C | 2.5629532598  | -2.5667333443 | -0.412511927  |
| H | 1.7056506184  | -2.3731158873 | -1.0535967054 |
| C | 3.1333893144  | -3.8349841265 | -0.3743514006 |
| H | 2.7190157547  | -4.6297687992 | -0.9877414687 |
| C | 4.2260466342  | -4.0850616755 | 0.4540208249  |
| H | 4.6655438981  | -5.0778618016 | 0.4872925165  |
| C | 4.7523562071  | -3.0650375432 | 1.2434830015  |
| H | 5.6015484594  | -3.2592294459 | 1.8923047641  |
| C | 4.1923274992  | -1.7906106639 | 1.2054535803  |
| H | 4.6080460173  | -1.0019504984 | 1.8261126391  |
| C | 3.1897774157  | 1.0213535005  | -1.0518999652 |
| C | 4.3288295046  | 0.5087524442  | -1.6780757387 |
| H | 4.7135673841  | -0.4687605691 | -1.402207506  |
| C | 4.9730904791  | 1.256387656   | -2.6624542919 |
| H | 5.8578171873  | 0.8548066922  | -3.1479035669 |
| C | 4.4844749861  | 2.5091080139  | -3.0215629711 |
| H | 4.9879325973  | 3.0882121082  | -3.7903914414 |
| C | 3.3438489225  | 3.0195819159  | -2.4009608463 |
| H | 2.9551882235  | 3.99256659    | -2.6871347769 |
| C | 2.6925871096  | 2.2771729619  | -1.4236572372 |
| H | 1.7919676054  | 2.6674422128  | -0.9559360513 |
| C | 0.0022977163  | -1.7012735779 | 3.7429052302  |
| C | 1.1998640041  | -2.1370787355 | 4.3171958275  |
| H | 2.1263277063  | -1.5920456904 | 4.1555174567  |
| C | 1.2022993865  | -3.2777015494 | 5.1165998731  |
| H | 2.1304813297  | -3.6161445767 | 5.5678685614  |
| C | 0.0189889689  | -3.979205774  | 5.3364592901  |
| H | 0.0252337723  | -4.8688797839 | 5.9595865569  |
| C | -1.173278575  | -3.5434119782 | 4.7608316803  |
| H | -2.0955368182 | -4.0903689626 | 4.9339230914  |
| C | -1.1871976616 | -2.40409017   | 3.961058072   |
| H | -2.1230566529 | -2.0726306619 | 3.5174007258  |

XYZ coordinates of the optimized structure of **2F**

81

|    |               |               |               |
|----|---------------|---------------|---------------|
| Pd | 0.0027272952  | -0.1013265744 | -0.0173530374 |
| P  | -2.2978776242 | -0.0038144556 | 0.1856641616  |
| Cl | 0.0028984401  | -0.3161642743 | -2.4767064275 |
| Sb | 0.0010678332  | -0.2068552484 | 2.5992497522  |
| P  | 2.2964434096  | 0.1031620555  | 0.1885420303  |
| C  | -1.9372069458 | 0.7377260127  | 2.8653267087  |
| C  | -2.8133651625 | 0.7542483149  | 1.7728627367  |
| C  | -4.0764877367 | 1.3450995646  | 1.9048568701  |
| H  | -4.7593340081 | 1.3620116258  | 1.0593238989  |
| C  | -4.455898636  | 1.9254099683  | 3.1111671466  |
| H  | -5.4323412156 | 2.392909666   | 3.201267396   |
| C  | -3.5826557204 | 1.9068911214  | 4.1957519028  |
| H  | -3.8737176751 | 2.3648660785  | 5.1371965051  |
| C  | -2.3316664081 | 1.3044435692  | 4.0789212001  |
| H  | -1.6565929318 | 1.2736656603  | 4.9258941645  |
| C  | -3.1109316246 | 1.0339674693  | -1.0782637887 |
| C  | -2.5070075653 | 2.2504040436  | -1.4192663295 |
| H  | -1.5572199821 | 2.5276151156  | -0.9680044827 |
| C  | -3.1104176244 | 3.0964651938  | -2.3429105862 |
| H  | -2.6345940515 | 4.0376679141  | -2.60363086   |
| C  | -4.3147146637 | 2.7296584293  | -2.9433832877 |
| H  | -4.7814377905 | 3.3877661827  | -3.6710113958 |
| C  | -4.913898258  | 1.5166632534  | -2.6157012548 |
| H  | -5.8495431948 | 1.2250248806  | -3.084646109  |
| C  | -4.3162266645 | 0.6688014747  | -1.6843616145 |
| H  | -4.7878094885 | -0.2777110638 | -1.4351400424 |
| C  | -3.1316423099 | -1.6257425937 | 0.0953302989  |
| C  | -2.7962772811 | -2.4634593817 | -0.9782114902 |
| H  | -2.0698587644 | -2.1286603509 | -1.71625792   |
| C  | -3.3861569318 | -3.7174377342 | -1.0924340254 |
| H  | -3.125603825  | -4.3601212572 | -1.928885729  |
| C  | -4.299822467  | -4.1522140083 | -0.1323032134 |
| H  | -4.7538914056 | -5.1354002668 | -0.2197911374 |
| C  | -4.624891208  | -3.3281122484 | 0.9415373871  |
| H  | -5.3318125753 | -3.6651152852 | 1.6945722863  |
| C  | -4.0452262674 | -2.0655571634 | 1.0574432733  |
| H  | -4.3044053499 | -1.4292949675 | 1.8987784638  |
| C  | 1.8974919411  | 0.8185200787  | 2.8709282804  |
| C  | 2.7736908871  | 0.8770634955  | 1.7800285137  |
| C  | 4.0102252557  | 1.5208252815  | 1.9164773573  |
| H  | 4.6928740839  | 1.5701507124  | 1.0720612376  |
| C  | 4.3628882301  | 2.1117501356  | 3.1256538408  |
| H  | 5.318351245   | 2.6201336668  | 3.2191939878  |
| C  | 3.4898096234  | 2.0511258522  | 4.2088925674  |
| H  | 3.7598770158  | 2.5168094857  | 5.152814662   |
| C  | 2.2659236647  | 1.3962585041  | 4.0876140698  |

|   |               |               |               |
|---|---------------|---------------|---------------|
| H | 1.5918531028  | 1.3325633849  | 4.9335442003  |
| C | 3.0621831453  | 1.18361841    | -1.0693126222 |
| C | 2.4051698235  | 2.3745736628  | -1.401950491  |
| H | 1.4448998439  | 2.6074609281  | -0.9475431407 |
| C | 2.9701493412  | 3.2528019517  | -2.3198770689 |
| H | 2.4531362351  | 4.1739364173  | -2.5737622407 |
| C | 4.1892112392  | 2.9437606245  | -2.9230203311 |
| H | 4.6260937849  | 3.6268271944  | -3.6461500998 |
| C | 4.8416051091  | 1.7563597778  | -2.6034374297 |
| H | 5.7892585028  | 1.5097376731  | -3.0741028148 |
| C | 4.2824981631  | 0.8766391022  | -1.6777449024 |
| H | 4.796137136   | -0.0494047578 | -1.4349758927 |
| C | 3.2067227484  | -1.476473831  | 0.0938585586  |
| C | 2.9387883186  | -2.3106283907 | -1.0012923259 |
| H | 2.2198352988  | -1.9960665643 | -1.7553545138 |
| C | 3.5855646317  | -3.5360053088 | -1.1169517166 |
| H | 3.3771095279  | -4.1756934714 | -1.9701398286 |
| C | 4.4901208728  | -3.9462207809 | -0.1375072461 |
| H | 4.9891042647  | -4.9072452807 | -0.2265772387 |
| C | 4.7487759024  | -3.1260339714 | 0.9571210434  |
| H | 5.4485447479  | -3.4439446807 | 1.7249817883  |
| C | 4.1114286033  | -1.8917296674 | 1.0750606206  |
| H | 4.318722403   | -1.258533994  | 1.9329206758  |
| C | 0.0459920492  | -2.3502693669 | 2.803492164   |
| C | 0.1069393666  | -3.123223288  | 1.6405071964  |
| H | 0.1295065502  | -2.6395289215 | 0.6645864881  |
| C | 0.1393609581  | -4.5145306709 | 1.7215828985  |
| H | 0.1885659463  | -5.1068564393 | 0.8117239144  |
| C | 0.1085050694  | -5.1387402209 | 2.9664071962  |
| H | 0.1330038096  | -6.2233060369 | 3.0318270086  |
| C | 0.0461876195  | -4.3709269051 | 4.1279812062  |
| H | 0.0217664646  | -4.8563024004 | 5.1002879661  |
| C | 0.0158923349  | -2.9796778647 | 4.0518999614  |
| H | -0.0297584542 | -2.3808550168 | 4.9543189557  |
| F | -0.0032001319 | -0.1827759216 | 4.65093627    |

XYZ coordinates of the optimized structure of [2]BMe<sub>4</sub>  
97

|    |               |               |               |
|----|---------------|---------------|---------------|
| Pd | -0.0079825606 | -0.0008888095 | -0.0076489502 |
| P  | -2.3189895997 | 0.2992239914  | 0.2187736551  |
| Cl | 0.0012058721  | -0.0696400373 | -2.3872483556 |
| Sb | -0.0076925226 | 0.0094246172  | 2.4946502687  |
| P  | 2.3156940387  | 0.1037192612  | 0.2512302872  |
| C  | -1.8313721509 | 1.0317670328  | 2.9131602735  |
| C  | -2.7207563416 | 1.1071360884  | 1.8265143921  |
| C  | -3.9400537665 | 1.7745494498  | 1.9915163255  |
| H  | -4.6309182222 | 1.8581890441  | 1.1569121014  |
| C  | -4.2712602956 | 2.336829427   | 3.2211648819  |
| H  | -5.2184573351 | 2.8551952174  | 3.3361142674  |

|   |               |               |               |
|---|---------------|---------------|---------------|
| C | -3.396387226  | 2.2332779877  | 4.2996885513  |
| H | -3.6579958209 | 2.6710914638  | 5.2583919175  |
| C | -2.1766894085 | 1.5772340088  | 4.1504545039  |
| H | -1.504444912  | 1.5065182472  | 5.0004916833  |
| C | -3.232594422  | -1.2755795559 | 0.1881139576  |
| C | -2.8790043546 | -2.1991868943 | -0.8061005654 |
| H | -2.0917514964 | -1.9559342108 | -1.5167332196 |
| C | -3.5375855794 | -3.4216770979 | -0.882251166  |
| H | -3.2643908833 | -4.1321494547 | -1.6570921177 |
| C | -4.5372654822 | -3.7365177651 | 0.0374476578  |
| H | -5.0449165813 | -4.6951390736 | -0.0198661438 |
| C | -4.8831400811 | -2.8247687564 | 1.031571456   |
| H | -5.6603821881 | -3.0686182261 | 1.7500854332  |
| C | -4.235854724  | -1.5932579981 | 1.1095497525  |
| H | -4.5145576195 | -0.8876925339 | 1.8869322751  |
| C | -3.0680942319 | 1.3809038464  | -1.035499209  |
| C | -2.4227927093 | 2.5863269405  | -1.3401022957 |
| H | -1.4814525962 | 2.8390120596  | -0.8572680652 |
| C | -2.9800233425 | 3.4553714337  | -2.2703709011 |
| H | -2.4766846474 | 4.3886475731  | -2.5054868279 |
| C | -4.1744571094 | 3.1221638668  | -2.9096526553 |
| H | -4.604305509  | 3.7996965281  | -3.6418354179 |
| C | -4.8118253825 | 1.9200507494  | -2.6162241343 |
| H | -5.739461388  | 1.6566766536  | -3.1160846442 |
| C | -4.2623854488 | 1.0463226026  | -1.6796143551 |
| H | -4.7624610087 | 0.108490166   | -1.4551298691 |
| C | 1.8264159803  | 1.0239985624  | 2.8850646822  |
| C | 2.7321530838  | 1.0024159185  | 1.8078653522  |
| C | 3.9642516364  | 1.6513087823  | 1.9437845582  |
| H | 4.6677232774  | 1.6609167325  | 1.1156528417  |
| C | 4.2904721653  | 2.2964599099  | 3.1341440158  |
| H | 5.2474362213  | 2.8014504895  | 3.2252981815  |
| C | 3.3964367841  | 2.2969423811  | 4.20105877    |
| H | 3.6514549983  | 2.804123118   | 5.1267406205  |
| C | 2.164027047   | 1.6574737639  | 4.0813989511  |
| H | 1.4742181944  | 1.6740862632  | 4.9199911202  |
| C | 3.0960933944  | -1.5361670447 | 0.3738593616  |
| C | 2.5629532598  | -2.5667333443 | -0.412511927  |
| H | 1.7056506184  | -2.3731158873 | -1.0535967054 |
| C | 3.1333893144  | -3.8349841265 | -0.3743514006 |
| H | 2.7190157547  | -4.6297687992 | -0.9877414687 |
| C | 4.2260466342  | -4.0850616755 | 0.4540208249  |
| H | 4.6655438981  | -5.0778618016 | 0.4872925165  |
| C | 4.7523562071  | -3.0650375432 | 1.2434830015  |
| H | 5.6015484594  | -3.2592294459 | 1.8923047641  |
| C | 4.1923274992  | -1.7906106639 | 1.2054535803  |
| H | 4.6080460173  | -1.0019504984 | 1.8261126391  |
| C | 3.1897774157  | 1.0213535005  | -1.0518999652 |
| C | 4.3288295046  | 0.5087524442  | -1.6780757387 |

|   |               |               |               |
|---|---------------|---------------|---------------|
| H | 4.7135673841  | -0.4687605691 | -1.402207506  |
| C | 4.9730904791  | 1.256387656   | -2.6624542919 |
| H | 5.8578171873  | 0.8548066922  | -3.1479035669 |
| C | 4.4844749861  | 2.5091080139  | -3.0215629711 |
| H | 4.9879325973  | 3.0882121082  | -3.7903914414 |
| C | 3.3438489225  | 3.0195819159  | -2.4009608463 |
| H | 2.9551882235  | 3.99256659    | -2.6871347769 |
| C | 2.6925871096  | 2.2771729619  | -1.4236572372 |
| H | 1.7919676054  | 2.6674422128  | -0.9559360513 |
| C | 0.0022977163  | -1.7012735779 | 3.7429052302  |
| C | 1.1998640041  | -2.1370787355 | 4.3171958275  |
| H | 2.1263277063  | -1.5920456904 | 4.1555174567  |
| C | 1.2022993865  | -3.2777015494 | 5.1165998731  |
| H | 2.1304813297  | -3.6161445767 | 5.5678685614  |
| C | 0.0189889689  | -3.979205774  | 5.3364592901  |
| H | 0.0252337723  | -4.8688797839 | 5.9595865569  |
| C | -1.173278575  | -3.5434119782 | 4.7608316803  |
| H | -2.0955368182 | -4.0903689626 | 4.9339230914  |
| C | -1.1871976616 | -2.40409017   | 3.961058072   |
| H | -2.1230566529 | -2.0726306619 | 3.5174007258  |
| B | 0.9769926205  | 1.0515742152  | 8.4226142443  |
| C | 0.5715377728  | 2.13632439    | 9.5963738573  |
| C | 0.9178268842  | -0.4817479383 | 9.0274319511  |
| C | -0.0923399805 | 1.1778273215  | 7.165364428   |
| C | 2.4982252808  | 1.381754717   | 7.8730301806  |
| H | 1.1682729291  | -1.2494657231 | 8.2739101175  |
| H | -0.0813437842 | -0.7514721278 | 9.4125101718  |
| H | 1.6168123141  | -0.6395266631 | 9.8675226047  |
| H | 0.5877635306  | 3.1813215946  | 9.2397038595  |
| H | 1.2567765742  | 2.1011794226  | 10.4611592143 |
| H | -0.440521042  | 1.9709084408  | 10.00519298   |
| H | 2.8330628126  | 0.69137416    | 7.0788393928  |
| H | 3.2633043117  | 1.324024204   | 8.6671595526  |
| H | 2.5809110737  | 2.3991452629  | 7.4491497598  |
| H | 0.1098356087  | 0.4290635936  | 6.3774844109  |
| H | -0.0581232476 | 2.1721127864  | 6.6825438555  |
| H | -1.142192883  | 1.020894614   | 7.4693408811  |

XYZ coordinates of the optimized structure of **3**

102

|    |               |               |               |
|----|---------------|---------------|---------------|
| Pd | -0.0235812149 | -0.048445498  | 0.0276795572  |
| P  | -2.3121740763 | 0.326796656   | 0.3776788565  |
| Cl | -0.0796104434 | -0.0206128126 | -2.3541230525 |
| Sb | 0.0599295842  | -0.0032836613 | 2.5392614238  |
| P  | 2.3068187729  | 0.2399902448  | 0.1389975949  |
| P  | 1.4374371117  | -2.8679820599 | 2.800237429   |
| C  | -1.4599109536 | 1.496944694   | 2.795365719   |
| C  | -2.4230935333 | 1.5344086486  | 1.7683333256  |
| C  | -3.460199365  | 2.4706557232  | 1.8315825065  |



|   |               |               |               |
|---|---------------|---------------|---------------|
| H | -4.2024689799 | 2.5163601971  | 1.0395251594  |
| C | -3.5386783807 | 3.3587731848  | 2.9021520683  |
| H | -4.3439932303 | 4.0865090215  | 2.937548181   |
| C | -2.5885164859 | 3.3173728385  | 3.9178013045  |
| H | -2.6449654943 | 4.0162481093  | 4.747263786   |
| C | -1.5536513776 | 2.3837711161  | 3.8685862617  |
| H | -0.8163145534 | 2.3698937659  | 4.6665238894  |
| C | -3.1991418138 | 1.1066614522  | -1.004675211  |
| C | -2.726937655  | 2.3292058628  | -1.5011622402 |
| H | -1.8550235276 | 2.8016968196  | -1.0554971108 |
| C | -3.3698200553 | 2.939948053   | -2.5707581525 |
| H | -3.0020653494 | 3.8893156573  | -2.9489986822 |
| C | -4.4756699099 | 2.329400742   | -3.1632885486 |
| H | -4.9728837523 | 2.8060067592  | -4.0032770234 |
| C | -4.9377239456 | 1.1081709827  | -2.68219691   |
| H | -5.7955956651 | 0.6274925897  | -3.1434182218 |
| C | -4.3028370489 | 0.4939163121  | -1.6040398138 |
| H | -4.6702222471 | -0.4583248811 | -1.2333608214 |
| C | -3.3007371477 | -1.1161870989 | 0.8856806217  |
| C | -2.8596831127 | -2.3920642893 | 0.5155956674  |
| H | -1.9302540533 | -2.5084563177 | -0.0370564049 |
| C | -3.6084239225 | -3.5147483583 | 0.8608870184  |
| H | -3.2573045938 | -4.5013439444 | 0.5741867431  |
| C | -4.790421072  | -3.3691717809 | 1.5829109443  |
| H | -5.3705345266 | -4.2458874084 | 1.8566623972  |
| C | -5.2282782405 | -2.1006102511 | 1.9613537394  |
| H | -6.1472840494 | -1.9866684095 | 2.5290358603  |
| C | -4.4886129633 | -0.9745272025 | 1.6144839401  |
| H | -4.8348583469 | 0.0104959019  | 1.915738721   |
| C | 2.0086677149  | 0.7745421079  | 2.9140541726  |
| C | 2.8658496921  | 0.8100159238  | 1.8034309754  |
| C | 4.1653321267  | 1.3060006221  | 1.9635093603  |
| H | 4.836430759   | 1.3606718775  | 1.110230597   |
| C | 4.6053986215  | 1.7352100207  | 3.2122296994  |
| H | 5.6162504854  | 2.1159281623  | 3.3233916819  |
| C | 3.7542642425  | 1.6783742734  | 4.313400642   |
| H | 4.0982295366  | 2.0149201859  | 5.2870154839  |
| C | 2.4548615755  | 1.197093421   | 4.1674618137  |
| H | 1.8013552888  | 1.1565455292  | 5.0345920097  |
| C | 2.8647029124  | 1.5795717735  | -0.9654167235 |
| C | 2.0961130838  | 2.7490443044  | -1.0219249441 |
| H | 1.1686140133  | 2.8178216098  | -0.4579274062 |
| C | 2.5112510549  | 3.8187301627  | -1.8065732952 |
| H | 1.9105936982  | 4.7229092584  | -1.8467877814 |
| C | 3.6888380712  | 3.7253531419  | -2.5482483716 |
| H | 4.0079621319  | 4.5591486128  | -3.1670639935 |
| C | 4.4517350737  | 2.5622054089  | -2.4997250307 |
| H | 5.3678366389  | 2.4846609884  | -3.0782388567 |
| C | 4.0450225174  | 1.4892043292  | -1.7086525036 |

|   |               |               |               |
|---|---------------|---------------|---------------|
| H | 4.6455873477  | 0.5846671467  | -1.6778639639 |
| C | 3.3049774152  | -1.2211642148 | -0.286930871  |
| C | 3.1125270961  | -1.7876498823 | -1.5564851603 |
| H | 2.3994237143  | -1.343114602  | -2.2468730661 |
| C | 3.8268443632  | -2.9226379351 | -1.9252364148 |
| H | 3.6787276243  | -3.3527892595 | -2.9116166668 |
| C | 4.7230312446  | -3.5091651783 | -1.0310430816 |
| H | 5.275888014   | -4.3982385609 | -1.3206002163 |
| C | 4.9057210048  | -2.9563906195 | 0.233566175   |
| H | 5.5957912311  | -3.4128037057 | 0.9374272154  |
| C | 4.200159781   | -1.8138515002 | 0.6085084508  |
| H | 4.3484657789  | -1.395629481  | 1.5989442981  |
| C | -0.4101673929 | -1.3493287207 | 4.1361704811  |
| C | 0.3210863538  | -2.5436116401 | 4.2137328179  |
| C | 0.1490211306  | -3.3706278441 | 5.3279720273  |
| H | 0.7343908939  | -4.2820312732 | 5.4212776211  |
| C | -0.7689244902 | -3.0278589333 | 6.3182828671  |
| H | -0.899725991  | -3.6771322288 | 7.1792140957  |
| C | -1.5232489285 | -1.8615582122 | 6.2061515344  |
| H | -2.2415663676 | -1.6010689147 | 6.9780062774  |
| C | -1.3463461031 | -1.0133142437 | 5.1142949956  |
| H | -1.9236063732 | -0.0955245563 | 5.0447190076  |
| C | 2.9055641568  | -3.6469336851 | 3.5683009281  |
| C | 3.2100315084  | -5.0056610221 | 3.4388764727  |
| H | 2.544496953   | -5.661954638  | 2.8851761384  |
| C | 4.3678462743  | -5.5226729738 | 4.0180011301  |
| H | 4.5942738649  | -6.5801760261 | 3.9126147251  |
| C | 5.2281303911  | -4.6912450894 | 4.7301233418  |
| H | 6.1298047408  | -5.0972438985 | 5.1800235838  |
| C | 4.9323375556  | -3.3345363131 | 4.8606043218  |
| H | 5.6028386766  | -2.6799960358 | 5.4106758836  |
| C | 3.7831180021  | -2.8125566084 | 4.27665983    |
| H | 3.567465097   | -1.7496982304 | 4.3708235782  |
| C | 0.63208937    | -4.2097737567 | 1.8501941242  |
| C | 0.983679225   | -4.3155448693 | 0.4969679377  |
| H | 1.6971413374  | -3.6175691502 | 0.0651527026  |
| C | 0.4279486512  | -5.3124810836 | -0.3003760417 |
| H | 0.7125687     | -5.3861288764 | -1.3463294591 |
| C | -0.4944830427 | -6.2058464888 | 0.2412973022  |
| H | -0.9315917344 | -6.9815402035 | -0.3813104599 |
| C | -0.8572969264 | -6.1001967667 | 1.5826960073  |
| H | -1.5775522028 | -6.7931690418 | 2.0090324326  |
| C | -0.2981284346 | -5.1081023168 | 2.3851772469  |
| H | -0.5953637961 | -5.034377952  | 3.4271098647  |

XYZ coordinates of the optimized structure of **3F**

103

Pd 0.0637530415 0.0141647828 -0.0751970863

P 2.0726192828 1.3354683136 0.0434485535

|    |               |               |               |
|----|---------------|---------------|---------------|
| Cl | 0.0711474242  | -0.246288258  | -2.5530264333 |
| Sb | 0.0529164535  | 0.1540792966  | 2.5207370698  |
| P  | -2.044971674  | 1.1488199889  | 0.0085958176  |
| P  | 0.2348079969  | -2.3341747548 | 0.2897557236  |
| C  | 2.158837334   | 0.635937019   | 2.7679269377  |
| C  | 2.8912573837  | 1.1258671427  | 1.6801057599  |
| C  | 4.2194923237  | 1.5277351749  | 1.8773125288  |
| H  | 4.7850349103  | 1.9494737996  | 1.050738871   |
| C  | 4.8270264049  | 1.3863481473  | 3.1195188578  |
| H  | 5.8621818666  | 1.6887604564  | 3.2516839069  |
| C  | 4.1042619725  | 0.8630789279  | 4.1887851432  |
| H  | 4.5742765102  | 0.745204275   | 5.1613574807  |
| C  | 2.7693181081  | 0.5069826012  | 4.0200155945  |
| H  | 2.1926250609  | 0.1372885295  | 4.859131988   |
| C  | 3.3368635984  | 0.8949244143  | -1.2043819137 |
| C  | 3.1584323893  | 1.3626389713  | -2.5150587215 |
| H  | 2.3128642916  | 2.0009491748  | -2.7536788589 |
| C  | 4.0571846793  | 1.0167365149  | -3.5183574195 |
| H  | 3.9074786484  | 1.3945144257  | -4.5260084332 |
| C  | 5.1406290157  | 0.1868816026  | -3.2332131574 |
| H  | 5.8446500693  | -0.0805561366 | -4.0164347213 |
| C  | 5.3110390237  | -0.3020420244 | -1.9412937302 |
| H  | 6.1470364166  | -0.9567159927 | -1.710083877  |
| C  | 4.4123681984  | 0.0431148489  | -0.9330955249 |
| H  | 4.555375872   | -0.3581891841 | 0.0650615122  |
| C  | 2.0277107418  | 3.1796233933  | -0.052816089  |
| C  | 0.9363290426  | 3.8400391915  | 0.5221426714  |
| H  | 0.1143951357  | 3.2639568785  | 0.9377919558  |
| C  | 0.887348328   | 5.2306583204  | 0.5665976935  |
| H  | 0.0311210357  | 5.7234953679  | 1.019078542   |
| C  | 1.9256184868  | 5.9823750756  | 0.0222282967  |
| H  | 1.8856992087  | 7.0678793254  | 0.0469255371  |
| C  | 3.0151386811  | 5.3355283983  | -0.5573073141 |
| H  | 3.8298992662  | 5.9144880518  | -0.9839315733 |
| C  | 3.071230037   | 3.9439656602  | -0.5897937615 |
| H  | 3.9295093342  | 3.4564532644  | -1.0426142064 |
| C  | -1.4029406878 | 1.7590538227  | 2.6853323183  |
| C  | -2.2054496102 | 2.0938516745  | 1.5857273297  |
| C  | -3.1198099664 | 3.1480439105  | 1.7080819677  |
| H  | -3.7489242123 | 3.420136668   | 0.866272452   |
| C  | -3.2214777023 | 3.8684564888  | 2.893584292   |
| H  | -3.926662726  | 4.6919439428  | 2.9647479023  |
| C  | -2.4192257346 | 3.5329456225  | 3.980428456   |
| H  | -2.4896208527 | 4.0949896865  | 4.9076912148  |
| C  | -1.5200924848 | 2.4745462821  | 3.8812384511  |
| H  | -0.9032675242 | 2.1999461476  | 4.7283917224  |
| C  | -2.3778804954 | 2.3943647316  | -1.2990513072 |
| C  | -1.2894168028 | 2.938565368   | -1.9876460552 |
| H  | -0.2912614374 | 2.5688013885  | -1.7776408943 |

|   |               |               |               |
|---|---------------|---------------|---------------|
| C | -1.4834998606 | 3.9250326259  | -2.9517292379 |
| H | -0.6274706259 | 4.3365967187  | -3.4795444478 |
| C | -2.769401759  | 4.3684896597  | -3.2484892663 |
| H | -2.9219041005 | 5.1329972547  | -4.0055137644 |
| C | -3.86309144   | 3.8196949411  | -2.5810000921 |
| H | -4.8703233042 | 4.1539563256  | -2.8145733116 |
| C | -3.6705625603 | 2.8374162625  | -1.6136451983 |
| H | -4.5339787388 | 2.4070009229  | -1.113471535  |
| C | -3.5724109739 | 0.12925019    | -0.010457735  |
| C | -4.0788686086 | -0.3321324174 | -1.2344570151 |
| H | -3.6074907936 | -0.0297521101 | -2.166287902  |
| C | -5.1872958173 | -1.1738209201 | -1.2675187046 |
| H | -5.5748591101 | -1.5121086397 | -2.2248341909 |
| C | -5.7964842215 | -1.5798459538 | -0.0812830802 |
| H | -6.6609551107 | -2.2372632258 | -0.1084319012 |
| C | -5.2921842843 | -1.1362418844 | 1.1388497045  |
| H | -5.761649183  | -1.4452531146 | 2.0688243153  |
| C | -4.1885902038 | -0.2859171439 | 1.1761014789  |
| H | -3.8142211151 | 0.0597670785  | 2.1360135489  |
| C | -0.6481907655 | -1.8609284041 | 2.9014365895  |
| C | -0.5443136985 | -2.8128080271 | 1.8823727192  |
| C | -1.0206543633 | -4.1109485211 | 2.1035081733  |
| H | -0.9369624802 | -4.8579909428 | 1.3187147348  |
| C | -1.6109888502 | -4.4464554865 | 3.3180342014  |
| H | -1.9906621485 | -5.4525319937 | 3.4733483637  |
| C | -1.7125774966 | -3.4939198651 | 4.3288637282  |
| H | -2.1771635311 | -3.751106285  | 5.2769371529  |
| C | -1.220762971  | -2.2059715531 | 4.1284898157  |
| H | -1.2828890561 | -1.466391207  | 4.9179400095  |
| C | -0.5916641547 | -3.4498486368 | -0.9082679349 |
| C | -1.8731456158 | -3.0971092681 | -1.3441134198 |
| H | -2.3147036662 | -2.161194134  | -1.0149679417 |
| C | -2.5812439135 | -3.9321285095 | -2.2012696007 |
| H | -3.576740637  | -3.644300631  | -2.5285992524 |
| C | -2.010429127  | -5.1235482065 | -2.6470369507 |
| H | -2.5593642885 | -5.7717322673 | -3.3247612969 |
| C | -0.732079301  | -5.4775142681 | -2.2243131356 |
| H | -0.2800649735 | -6.4043460474 | -2.5672308071 |
| C | -0.0248808209 | -4.6479725309 | -1.3549246327 |
| H | 0.9691630154  | -4.9386690314 | -1.0286620905 |
| C | 1.9250183913  | -3.0376856173 | 0.4090998027  |
| C | 2.7621720653  | -2.9172628605 | -0.708581379  |
| H | 2.4042179844  | -2.4046232701 | -1.5988717474 |
| C | 4.0474456861  | -3.4489049224 | -0.6836734207 |
| H | 4.6814851133  | -3.3578102728 | -1.560978636  |
| C | 4.5248019951  | -4.0782471488 | 0.4654487886  |
| H | 5.5314924983  | -4.4866893165 | 0.4853109867  |
| C | 3.7085377789  | -4.1761344055 | 1.5889872973  |
| H | 4.0751816657  | -4.659101381  | 2.4907745956  |

C 2.4112214968 -3.6654149607 1.5609814076  
H 1.7793001155 -3.7632920307 2.4388873682  
F 0.0440902012 0.2638647147 4.564769376

XYZ coordinates of the optimized structure of **3'**

102

Pd -0.0380486218 -0.0059139058 -0.1997610615  
P 2.1039010006 1.3151951789 0.0802883197  
Cl -0.1425492971 -0.1704304092 -2.5908477711  
Sb -0.0261687063 0.0746492483 2.2529468522  
P -2.0891354963 1.2742206366 0.0222093271  
P 0.2091386399 -2.3827472454 0.1934669351  
C 1.85437988 0.861890586 2.8735467795  
C 2.6427037996 1.4060186967 1.8480127488  
C 3.8280332597 2.0677158479 2.1971678132  
H 4.4334816532 2.5343127896 1.4245852914  
C 4.2366971349 2.1365399762 3.5247227935  
H 5.1615142353 2.6472300059 3.7762980953  
C 3.4643720142 1.5550777276 4.5283982935  
H 3.7873551848 1.6034774912 5.5640740339  
C 2.2653403024 0.9261530762 4.2080233337  
H 1.6624599291 0.496239414 5.0032673593  
C 3.5149506935 0.605561305 -0.8418355433  
C 3.3766628591 0.5051723929 -2.2349403795  
H 2.4454786698 0.7998140738 -2.7115381461  
C 4.4198288976 0.0093195489 -3.0105429478  
H 4.3038687401 -0.0494896792 -4.0892027141  
C 5.6004592073 -0.4181530826 -2.4064614003  
H 6.4143931573 -0.8059381909 -3.0126973033  
C 5.7257018356 -0.3630089184 -1.0212399114  
H 6.6339272124 -0.7153279359 -0.5402618693  
C 4.6909838805 0.1461057821 -0.2394593924  
H 4.8088368892 0.1758090961 0.8387070912  
C 2.1150972405 3.1057455262 -0.3439718756  
C 1.3485535419 3.9643268123 0.4582814955  
H 0.7909055963 3.5718604508 1.3057371861  
C 1.2950657838 5.3261429499 0.186129183  
H 0.7024710901 5.9779832744 0.821832889  
C 1.994049102 5.8504726064 -0.9009602341  
H 1.9492260225 6.9141667872 -1.1165725648  
C 2.7495411695 5.0042740461 -1.7064486499  
H 3.3021422658 5.4038696788 -2.5522512519  
C 2.8146552819 3.6382979835 -1.4304736952  
H 3.4214007519 2.9969864366 -2.0617509206  
C -1.5741845794 1.4363340118 2.8042300223  
C -2.3218189885 1.9519851209 1.7321100953  
C -3.2842228608 2.9317452442 2.0014205661  
H -3.8667613636 3.3586667437 1.1914619934  
C -3.5015887504 3.3742789924 3.3026204441

|   |               |               |               |
|---|---------------|---------------|---------------|
| H | -4.2482092024 | 4.1402125732  | 3.4904087585  |
| C | -2.7708925581 | 2.837313047   | 4.3592939002  |
| H | -2.9449847867 | 3.1788134524  | 5.3752873567  |
| C | -1.8030050822 | 1.8680193457  | 4.1128341761  |
| H | -1.2331074762 | 1.4669347655  | 4.9452982697  |
| C | -2.340555023  | 2.6725097676  | -1.1263252024 |
| C | -1.2285487403 | 3.2176456546  | -1.7738846741 |
| H | -0.2481973141 | 2.7820431946  | -1.6143279976 |
| C | -1.3787676615 | 4.3001505534  | -2.6375165397 |
| H | -0.5057586636 | 4.7148743583  | -3.1331037342 |
| C | -2.6414268491 | 4.8379399848  | -2.8692471439 |
| H | -2.7592152527 | 5.6792063498  | -3.5465874517 |
| C | -3.7589693427 | 4.2859431544  | -2.2441089015 |
| H | -4.7483922038 | 4.6923035618  | -2.4339552968 |
| C | -3.6133874773 | 3.2049219025  | -1.3809046408 |
| H | -4.4959666451 | 2.7650117177  | -0.9245947621 |
| C | -3.5962768008 | 0.2602606468  | -0.2101020492 |
| C | -4.02975454   | -0.0221248403 | -1.5133214011 |
| H | -3.5055074027 | 0.4010693151  | -2.365776984  |
| C | -5.1342583566 | -0.843360808  | -1.7216026344 |
| H | -5.467661782  | -1.044883155  | -2.7358061489 |
| C | -5.8077299999 | -1.4033839896 | -0.6369706239 |
| H | -6.6702465062 | -2.0427556662 | -0.8019615621 |
| C | -5.371780095  | -1.1388520058 | 0.6592401235  |
| H | -5.8924998306 | -1.5700670816 | 1.509589038   |
| C | -4.2718378522 | -0.3112596928 | 0.8747072865  |
| H | -3.9496914956 | -0.1076172017 | 1.8923182413  |
| C | -0.3374080536 | -1.916491714  | 2.932283695   |
| C | -0.2623830971 | -2.8793595444 | 1.9137529117  |
| C | -0.5182774044 | -4.2167967468 | 2.2362784283  |
| H | -0.4792774402 | -4.9781841749 | 1.4621250867  |
| C | -0.8316885586 | -4.5785115194 | 3.543526074   |
| H | -1.0346385747 | -5.619377234  | 3.7774922025  |
| C | -0.886279445  | -3.6148240463 | 4.5479301084  |
| H | -1.1310549865 | -3.9005983184 | 5.5665914896  |
| C | -0.6391371231 | -2.278026369  | 4.2461860936  |
| H | -0.6937515588 | -1.5328635332 | 5.0347107367  |
| C | -0.7902974458 | -3.4820965038 | -0.868474594  |
| C | -2.069640516  | -3.0629518013 | -1.2464057837 |
| H | -2.4213758753 | -2.0754221592 | -0.9626263828 |
| C | -2.8843567464 | -3.9004579522 | -2.001890157  |
| H | -3.8754893689 | -3.563304923  | -2.2912564062 |
| C | -2.4242240279 | -5.155340168  | -2.3959985483 |
| H | -3.0585033096 | -5.8047466596 | -2.9929011149 |
| C | -1.1459409463 | -5.5726608078 | -2.0324148879 |
| H | -0.7799805077 | -6.5475603264 | -2.3420184974 |
| C | -0.3284063311 | -4.7413951956 | -1.2705797253 |
| H | 0.669309314   | -5.0730386861 | -0.9977816263 |
| C | 1.9141945713  | -3.0136334617 | 0.0085823269  |

|   |              |               |               |
|---|--------------|---------------|---------------|
| C | 2.5022726738 | -2.921678435  | -1.2610833134 |
| H | 1.9480766455 | -2.4789621348 | -2.0852772942 |
| C | 3.790648607  | -3.3994579876 | -1.4684263807 |
| H | 4.2359523174 | -3.3283305517 | -2.4560369844 |
| C | 4.5133225726 | -3.9510792287 | -0.4106507023 |
| H | 5.5214420443 | -4.3210599867 | -0.575264712  |
| C | 3.943810088  | -4.0200566856 | 0.8570345995  |
| H | 4.5035889235 | -4.4436328587 | 1.6862812639  |
| C | 2.6460903298 | -3.5559896066 | 1.0695483964  |
| H | 2.2087237119 | -3.6292144696 | 2.0608036094  |

XYZ coordinates of the optimized structure of **3F'**

103

|    |               |               |               |
|----|---------------|---------------|---------------|
| Pd | 0.0153963099  | 0.0211436968  | -0.0014690496 |
| P  | 2.2945726749  | 0.4282113807  | 0.059917876   |
| Cl | -0.1240265198 | -0.1556392182 | -2.4622068633 |
| Sb | 0.0910526234  | -0.0945957121 | 2.6031210904  |
| P  | -2.2604061312 | 0.3536495838  | 0.3100446774  |
| P  | 1.5697534392  | -3.0569731574 | 1.5715809368  |
| C  | 2.1696519642  | 0.4933166933  | 2.8790352583  |
| C  | 2.9708279448  | 0.6737564536  | 1.7476899351  |
| C  | 4.2956704922  | 1.1040884461  | 1.9005008445  |
| H  | 4.9184757471  | 1.2637860075  | 1.0237174394  |
| C  | 4.8216006845  | 1.3334768324  | 3.1666616134  |
| H  | 5.8501370827  | 1.6667718868  | 3.2722824374  |
| C  | 4.0246538567  | 1.1378101811  | 4.2917889591  |
| H  | 4.4294383922  | 1.3147340714  | 5.2845763001  |
| C  | 2.7029582643  | 0.7218063583  | 4.1510509027  |
| H  | 2.0759393365  | 0.5731881911  | 5.0212572357  |
| C  | 3.4462520837  | -0.7168713652 | -0.7764426881 |
| C  | 3.3425231584  | -0.8664034656 | -2.1669757629 |
| H  | 2.5962959717  | -0.3002567903 | -2.7168042193 |
| C  | 4.1792374828  | -1.7498120846 | -2.8415549194 |
| H  | 4.0916896489  | -1.8528730452 | -3.9196017857 |
| C  | 5.1223573122  | -2.4985750265 | -2.1397377869 |
| H  | 5.7776733653  | -3.18503933   | -2.6687013201 |
| C  | 5.2195298859  | -2.3653352384 | -0.7571551184 |
| H  | 5.9511235556  | -2.9464626546 | -0.2020993432 |
| C  | 4.3828870698  | -1.4834217844 | -0.0748847562 |
| H  | 4.4655664093  | -1.3961431102 | 1.0041341306  |
| C  | 2.6102146626  | 2.0638312169  | -0.7129991013 |
| C  | 1.7079810324  | 3.0978438646  | -0.4291704808 |
| H  | 0.8372118026  | 2.8964161769  | 0.1915225289  |
| C  | 1.9193285557  | 4.3769543816  | -0.9332006174 |
| H  | 1.2137298835  | 5.1705809944  | -0.7029911139 |
| C  | 3.0288327022  | 4.6359415992  | -1.7368649124 |
| H  | 3.1903582713  | 5.6327616476  | -2.1376321179 |
| C  | 3.9276509177  | 3.613024687   | -2.0257355909 |
| H  | 4.7942334487  | 3.8082547961  | -2.6514800047 |

|   |               |               |               |
|---|---------------|---------------|---------------|
| C | 3.7244546441  | 2.3327087654  | -1.5134713638 |
| H | 4.4340109654  | 1.5444806832  | -1.7471039686 |
| C | -1.5866816612 | 1.2610527106  | 2.8707457781  |
| C | -2.5157706835 | 1.3600353515  | 1.8251041559  |
| C | -3.6164267428 | 2.2160703834  | 1.9531820273  |
| H | -4.3366873671 | 2.3010962124  | 1.1433675349  |
| C | -3.7809519667 | 2.9781591549  | 3.1068373409  |
| H | -4.6289502435 | 3.6520134661  | 3.1912925336  |
| C | -2.8585627709 | 2.8765870269  | 4.1447619843  |
| H | -2.981744382  | 3.4748052618  | 5.0435671061  |
| C | -1.7722192105 | 2.0096617106  | 4.0340777078  |
| H | -1.0637580899 | 1.9125125483  | 4.8489678818  |
| C | -3.0369506173 | 1.3552470591  | -1.0080740553 |
| C | -2.398048304  | 2.5382936298  | -1.4009804472 |
| H | -1.4535947646 | 2.8223499661  | -0.9436256693 |
| C | -2.9567821448 | 3.3434649351  | -2.3861523367 |
| H | -2.4533227375 | 4.2592066291  | -2.6833268111 |
| C | -4.1515020512 | 2.9682358276  | -3.0013934534 |
| H | -4.5838014722 | 3.5944076007  | -3.7769142703 |
| C | -4.7832954618 | 1.7871266014  | -2.6252649712 |
| H | -5.7105866479 | 1.4863112359  | -3.104962357  |
| C | -4.2305241147 | 0.9812191126  | -1.630043597  |
| H | -4.7316762791 | 0.0614566838  | -1.3433611654 |
| C | -3.3306909071 | -1.1160901313 | 0.4807319931  |
| C | -2.9354220056 | -2.2886507009 | -0.1738017559 |
| H | -2.0014801314 | -2.3056414641 | -0.7310838467 |
| C | -3.7330143985 | -3.4280912568 | -0.1096436658 |
| H | -3.4183724256 | -4.3344150748 | -0.6193277305 |
| C | -4.9246869122 | -3.4059775565 | 0.612065439   |
| H | -5.5445938086 | -4.2967332627 | 0.6649377004  |
| C | -5.3181249667 | -2.2436435748 | 1.2727344315  |
| H | -6.2436732512 | -2.2254602078 | 1.8415896213  |
| C | -4.5249751919 | -1.1010091478 | 1.2095558708  |
| H | -4.8351084802 | -0.2013905225 | 1.7342958662  |
| C | -0.6501992163 | -2.093857113  | 2.9520185963  |
| C | -0.0386382166 | -3.2446136982 | 2.4412702134  |
| C | -0.6465971208 | -4.4895005531 | 2.6529781985  |
| H | -0.1809281175 | -5.3886129045 | 2.2579035124  |
| C | -1.8409350072 | -4.5860839372 | 3.3571227952  |
| H | -2.3050568696 | -5.5573263277 | 3.5059482166  |
| C | -2.4361320425 | -3.4374854537 | 3.8770317497  |
| H | -3.3667755719 | -3.5076403967 | 4.4336334614  |
| C | -1.8405051782 | -2.195647228  | 3.6802647656  |
| H | -2.3061744007 | -1.3059680919 | 4.0957735958  |
| C | 1.4356617849  | -4.262073903  | 0.1912081537  |
| C | 1.0031035648  | -3.7586347761 | -1.0430885389 |
| H | 0.8084979671  | -2.6939286624 | -1.157904587  |
| C | 0.8248834221  | -4.6097367021 | -2.1316337448 |
| H | 0.4868183226  | -4.2028254781 | -3.0810256607 |



|   |              |               |               |
|---|--------------|---------------|---------------|
| C | 1.0926854474 | -5.9709873913 | -2.0054876408 |
| H | 0.9612842887 | -6.6342302945 | -2.8562528686 |
| C | 1.5384835996 | -6.4787349096 | -0.786515192  |
| H | 1.753629073  | -7.539158219  | -0.6834142113 |
| C | 1.7079454396 | -5.6315355433 | 0.306052707   |
| H | 2.0629041902 | -6.0388261563 | 1.2492187514  |
| C | 2.740335061  | -3.8520959562 | 2.7453381456  |
| C | 3.9835002941 | -4.3091084026 | 2.2814505207  |
| H | 4.2034939287 | -4.2921614225 | 1.2170821891  |
| C | 4.9376627425 | -4.7987565946 | 3.1683743302  |
| H | 5.8896809876 | -5.1592283341 | 2.7872473192  |
| C | 4.6755692192 | -4.8269128556 | 4.5368744489  |
| H | 5.4214391491 | -5.2076109831 | 5.2292062683  |
| C | 3.4511051258 | -4.3626587205 | 5.0100064654  |
| H | 3.2359975424 | -4.3789029787 | 6.0752536459  |
| C | 2.4906112585 | -3.8789096042 | 4.1238171248  |
| H | 1.5398992851 | -3.523014147  | 4.5113519996  |
| F | 0.0844912482 | -0.0557290823 | 4.6699171479  |

XYZ coordinates of the optimized structure of **3Cl**

103

|    |               |               |               |
|----|---------------|---------------|---------------|
| Pd | 0.0712130536  | 0.0815902983  | -0.139905718  |
| P  | 2.0721800068  | 1.3915355192  | -0.0034998002 |
| Cl | 0.0383771447  | -0.0728410973 | -2.6036768718 |
| Sb | 0.0894082952  | 0.1640702872  | 2.4393250125  |
| P  | -2.0859943193 | 1.1005772883  | 0.0625187258  |
| P  | 0.2712099773  | -2.2849908456 | 0.2235073701  |
| C  | 2.2494263031  | 0.4358667668  | 2.6547302194  |
| C  | 2.9366645141  | 1.022666279   | 1.5815096696  |
| C  | 4.2957407078  | 1.328590245   | 1.7353827756  |
| H  | 4.829704889   | 1.8239120341  | 0.9294179471  |
| C  | 4.9799463143  | 0.9833838384  | 2.8945891998  |
| H  | 6.0373994577  | 1.2141671047  | 2.9875065822  |
| C  | 4.3062734092  | 0.3326078026  | 3.9233371144  |
| H  | 4.8352344235  | 0.0338975117  | 4.8239989605  |
| C  | 2.9418171259  | 0.0789510766  | 3.8135238399  |
| H  | 2.4158889975  | -0.3855081045 | 4.6381345342  |
| C  | 3.2815455334  | 1.0002352311  | -1.3208814815 |
| C  | 3.0966642484  | 1.5942655187  | -2.5776836288 |
| H  | 2.2888075874  | 2.3039265697  | -2.730755491  |
| C  | 3.943228936   | 1.2854704146  | -3.6371999203 |
| H  | 3.7904772492  | 1.7618074706  | -4.6016630988 |
| C  | 4.9768394777  | 0.3663955725  | -3.4642472597 |
| H  | 5.6389890026  | 0.1268775693  | -4.2916825443 |
| C  | 5.1525971435  | -0.2459361663 | -2.2263246377 |
| H  | 5.9528735814  | -0.9669481617 | -2.0818554403 |
| C  | 4.308752226   | 0.0644559826  | -1.161398725  |
| H  | 4.4576234358  | -0.4285129891 | -0.2063733054 |
| C  | 2.0662006049  | 3.235875682   | -0.0057941584 |

|   |               |               |               |
|---|---------------|---------------|---------------|
| C | 0.9381287047  | 3.9040694661  | 0.4793196098  |
| H | 0.0657618244  | 3.3354464123  | 0.7853118567  |
| C | 0.920160959   | 5.2937906098  | 0.5748119932  |
| H | 0.0340906141  | 5.7939172799  | 0.9560655608  |
| C | 2.0288644045  | 6.0338252881  | 0.1744649589  |
| H | 2.0150005558  | 7.1181881421  | 0.2412081106  |
| C | 3.1566827486  | 5.3783628528  | -0.3175850532 |
| H | 4.0249398348  | 5.9496136883  | -0.6348414661 |
| C | 3.178808614   | 3.9894338306  | -0.4046986263 |
| H | 4.0627268866  | 3.4950529424  | -0.7972424058 |
| C | -1.2296579703 | 1.8848867989  | 2.6423741836  |
| C | -2.1275664907 | 2.1327985585  | 1.5921260119  |
| C | -3.0022690424 | 3.2220708724  | 1.6921591733  |
| H | -3.7098966815 | 3.4191358944  | 0.8923809118  |
| C | -2.9540521824 | 4.0772791728  | 2.7880822427  |
| H | -3.6284528502 | 4.9274189742  | 2.8391691655  |
| C | -2.0316165519 | 3.8477287865  | 3.803856099   |
| H | -1.9691744728 | 4.5234685403  | 4.6521966837  |
| C | -1.1828167859 | 2.7451510759  | 3.7403695005  |
| H | -0.4858687357 | 2.5567577275  | 4.5479835357  |
| C | -2.5624454234 | 2.2812244785  | -1.2581016479 |
| C | -1.5448027376 | 2.9350284222  | -1.9611009944 |
| H | -0.5093914327 | 2.6784728482  | -1.7608658944 |
| C | -1.8558350158 | 3.8886277784  | -2.9269427375 |
| H | -1.0555908352 | 4.3879438541  | -3.4663933776 |
| C | -3.1859910997 | 4.1871747395  | -3.2124356384 |
| H | -3.428178827  | 4.9248327568  | -3.9726184592 |
| C | -4.2063007071 | 3.5301770271  | -2.5276741342 |
| H | -5.246240769  | 3.7544918403  | -2.7488892609 |
| C | -3.8984328123 | 2.5830102762  | -1.5543664038 |
| H | -4.7034300257 | 2.0752883839  | -1.0301442879 |
| C | -3.5601275627 | 0.0226347189  | 0.2195533178  |
| C | -4.0676657691 | -0.6056141852 | -0.9273961745 |
| H | -3.6402877889 | -0.3836681058 | -1.9027968185 |
| C | -5.1282232331 | -1.5004929742 | -0.830483185  |
| H | -5.516124141  | -1.9727031264 | -1.7289874439 |
| C | -5.6899828996 | -1.7899026428 | 0.4125093162  |
| H | -6.5166813686 | -2.4907481112 | 0.4874963089  |
| C | -5.1895829551 | -1.1732789533 | 1.5559825449  |
| H | -5.6243031798 | -1.3894435194 | 2.5280462713  |
| C | -4.1324602012 | -0.269546813  | 1.4622928999  |
| H | -3.7604180942 | 0.2109481635  | 2.362862041   |
| C | -0.8807939053 | -1.7649065248 | 2.7275536516  |
| C | -0.7364685811 | -2.7080325741 | 1.7006350778  |
| C | -1.3833960681 | -3.943836003  | 1.8129003698  |
| H | -1.2633975156 | -4.68643017   | 1.0291882947  |
| C | -2.1960622783 | -4.22025776   | 2.9082433467  |
| H | -2.7077001675 | -5.1764597189 | 2.972612512   |
| C | -2.3549948482 | -3.2689380777 | 3.9105221195  |

|    |               |               |               |
|----|---------------|---------------|---------------|
| H  | -3.0004944143 | -3.4704592182 | 4.7608973485  |
| C  | -1.6865049427 | -2.0487223648 | 3.8303520762  |
| H  | -1.7977196269 | -1.3209686184 | 4.6251011655  |
| C  | -0.3688207927 | -3.4192902449 | -1.0641919093 |
| C  | -1.5143129526 | -3.0320745553 | -1.7671599041 |
| H  | -1.9494601124 | -2.0566093387 | -1.5794239982 |
| C  | -2.0842173252 | -3.8835398186 | -2.7082914075 |
| H  | -2.975174129  | -3.5713160634 | -3.2464836412 |
| C  | -1.5046028288 | -5.1234966669 | -2.9708287584 |
| H  | -1.9434326857 | -5.7841296862 | -3.7136037566 |
| C  | -0.3576977271 | -5.51169964   | -2.2825519242 |
| H  | 0.0992975039  | -6.477108135  | -2.4822687389 |
| C  | 0.2078356044  | -4.6667499258 | -1.3294661971 |
| H  | 1.0983329598  | -4.9830884333 | -0.7943636014 |
| C  | 1.9197106117  | -2.9896783965 | 0.613819443   |
| C  | 2.9122922647  | -2.924210953  | -0.3737737943 |
| H  | 2.6917534582  | -2.4681250618 | -1.3361830099 |
| C  | 4.1805118426  | -3.4417221768 | -0.1315325527 |
| H  | 4.9372891016  | -3.3945584869 | -0.9099870376 |
| C  | 4.4818885954  | -4.0103111332 | 1.1059368053  |
| H  | 5.474766831   | -4.4086623946 | 1.2954659955  |
| C  | 3.5060579126  | -4.0642108703 | 2.0968327093  |
| H  | 3.7327198687  | -4.5042757204 | 3.0641169442  |
| C  | 2.2281512207  | -3.5621559714 | 1.8523323668  |
| H  | 1.4725870061  | -3.6234018619 | 2.6303831576  |
| Cl | 0.09755029    | 0.2144440961  | 5.1576286891  |

XYZ coordinates of the optimized structure of **3Cl'**

103

|    |               |               |               |
|----|---------------|---------------|---------------|
| Pd | -0.0569237076 | -0.0110732875 | -0.0234098969 |
| P  | 2.2302832977  | 0.3655174319  | -0.0282223237 |
| Cl | -0.3129127586 | -0.215209646  | -2.4480028535 |
| Sb | 0.1183915532  | -0.2152554149 | 2.526411114   |
| P  | -2.303920458  | 0.3980083082  | 0.4002940933  |
| P  | 1.6439332258  | -3.1034754397 | 1.6488674059  |
| C  | 2.1430655532  | 0.5391748362  | 2.8093353911  |
| C  | 2.8962864287  | 0.7350932247  | 1.6432247294  |
| C  | 4.1778299409  | 1.292865045   | 1.74351245    |
| H  | 4.76261096    | 1.4628524015  | 0.8429572026  |
| C  | 4.7056859612  | 1.645297827   | 2.9801151039  |
| H  | 5.6998297589  | 2.0787629626  | 3.039948291   |
| C  | 3.950445111   | 1.4474838724  | 4.1314238115  |
| H  | 4.3492576439  | 1.7258487215  | 5.1029029006  |
| C  | 2.6742247377  | 0.8952775278  | 4.0484896159  |
| H  | 2.0910020407  | 0.7322969183  | 4.9474500299  |
| C  | 3.3834129699  | -0.827023548  | -0.7884780803 |
| C  | 3.1920537898  | -1.1475625885 | -2.1400664531 |
| H  | 2.366483209   | -0.7020885229 | -2.6894584158 |
| C  | 4.0475737585  | -2.0430128007 | -2.7735113728 |

|   |               |               |               |
|---|---------------|---------------|---------------|
| H | 3.8934092898  | -2.2812294676 | -3.822203774  |
| C | 5.093389399   | -2.6341437216 | -2.066543833  |
| H | 5.762274383   | -3.331112336  | -2.5636944133 |
| C | 5.2766671773  | -2.3312468247 | -0.7197300646 |
| H | 6.0895261673  | -2.7893196224 | -0.1625229213 |
| C | 4.4241892181  | -1.43378648   | -0.0784541405 |
| H | 4.5755808239  | -1.2099863793 | 0.9730876258  |
| C | 2.5391040497  | 1.9399271288  | -0.91807036   |
| C | 1.656282057   | 3.0027921433  | -0.6867222374 |
| H | 0.7992782256  | 2.8590583514  | -0.0324340132 |
| C | 1.8671289794  | 4.2371249362  | -1.2913191558 |
| H | 1.1766817678  | 5.0545937766  | -1.102880147  |
| C | 2.9556137346  | 4.4205155008  | -2.1433080896 |
| H | 3.1162039916  | 5.382525607   | -2.6218568298 |
| C | 3.8331859013  | 3.3668776626  | -2.382110718  |
| H | 4.6821827405  | 3.5029515303  | -3.0462969774 |
| C | 3.6306501248  | 2.1307817519  | -1.7704250496 |
| H | 4.3223556647  | 1.3167691885  | -1.9659462147 |
| C | -1.5060489081 | 1.135650735   | 2.9975785863  |
| C | -2.4880235451 | 1.2801361626  | 2.0022446213  |
| C | -3.581721469  | 2.1244207271  | 2.2326957349  |
| H | -4.3419956302 | 2.2497765552  | 1.4662795215  |
| C | -3.6838908969 | 2.8356212335  | 3.4245002506  |
| H | -4.5296324532 | 3.4978872625  | 3.5859784247  |
| C | -2.6965011693 | 2.7063400056  | 4.3967697239  |
| H | -2.7633888467 | 3.2723003472  | 5.3216960244  |
| C | -1.6169588917 | 1.8493480195  | 4.190313576   |
| H | -0.8653918937 | 1.7268734419  | 4.9625167703  |
| C | -3.0122850291 | 1.5603538413  | -0.8183631689 |
| C | -2.5518825353 | 2.8833598574  | -0.8425368429 |
| H | -1.8212024882 | 3.221011905   | -0.1117779776 |
| C | -3.0349942591 | 3.7753600273  | -1.7930882357 |
| H | -2.6775555644 | 4.8012698567  | -1.7991700532 |
| C | -3.9733721086 | 3.3536658864  | -2.7350593528 |
| H | -4.3483207679 | 4.0511331222  | -3.4787827186 |
| C | -4.4275399449 | 2.0382096057  | -2.7200736207 |
| H | -5.1572160539 | 1.7033524284  | -3.4519147492 |
| C | -3.9494043904 | 1.1412733387  | -1.7662902622 |
| H | -4.3062177516 | 0.1155221494  | -1.7653620716 |
| C | -3.4353158448 | -1.0321115661 | 0.4211318038  |
| C | -3.0686659137 | -2.1602103974 | -0.3219469829 |
| H | -2.1247011639 | -2.165304204  | -0.8621016125 |
| C | -3.9116734566 | -3.2675050188 | -0.3703934529 |
| H | -3.6213211946 | -4.1399876699 | -0.9487844466 |
| C | -5.1168566603 | -3.257495984  | 0.3278605406  |
| H | -5.7712206573 | -4.1241839095 | 0.2947103514  |
| C | -5.4822043421 | -2.1380992584 | 1.0743097803  |
| H | -6.4192870859 | -2.1305127558 | 1.6240164748  |
| C | -4.6465886608 | -1.0261619796 | 1.121519596   |

|    |               |               |               |
|----|---------------|---------------|---------------|
| H  | -4.9360338848 | -0.1619694384 | 1.7127826668  |
| C  | -0.6871848097 | -2.1928221594 | 2.8454073049  |
| C  | -0.0183341541 | -3.3299964661 | 2.3868661861  |
| C  | -0.6389831375 | -4.5802737771 | 2.5189546002  |
| H  | -0.1286488965 | -5.4713159078 | 2.161913979   |
| C  | -1.9000497969 | -4.6862463818 | 3.0923298209  |
| H  | -2.3735102786 | -5.6598275652 | 3.1842262502  |
| C  | -2.5544319693 | -3.5431090583 | 3.5524251778  |
| H  | -3.5406565153 | -3.6211303116 | 4.0014940591  |
| C  | -1.9494392806 | -2.2961136279 | 3.4351935431  |
| H  | -2.459167191  | -1.4132584302 | 3.8106197764  |
| C  | 1.6120916667  | -4.3033622532 | 0.2590757258  |
| C  | 1.0774527895  | -3.8470318608 | -0.9535144819 |
| H  | 0.7523731     | -2.8124383338 | -1.0491532819 |
| C  | 0.9614375302  | -4.7070385753 | -2.0424142392 |
| H  | 0.5428570225  | -4.3387010089 | -2.975345916  |
| C  | 1.3930141401  | -6.028052359  | -1.9389453575 |
| H  | 1.3097720533  | -6.6973626351 | -2.7909734087 |
| C  | 1.9369143805  | -6.4865842934 | -0.741123776  |
| H  | 2.2758410276  | -7.5156375336 | -0.6545179077 |
| C  | 2.0438013957  | -5.6316458132 | 0.3539899653  |
| H  | 2.4677733197  | -6.0011348287 | 1.2838156934  |
| C  | 2.7603776867  | -3.864857542  | 2.8907175869  |
| C  | 4.0814153602  | -4.1666137468 | 2.5258630837  |
| H  | 4.4015329607  | -4.0390324757 | 1.4946470907  |
| C  | 4.987536762   | -4.640177936  | 3.4697798308  |
| H  | 6.0033036927  | -4.8798616395 | 3.1663584517  |
| C  | 4.5961020059  | -4.803802188  | 4.797530892   |
| H  | 5.3050243818  | -5.1699407534 | 5.5350320121  |
| C  | 3.292261992   | -4.4920247002 | 5.1728793089  |
| H  | 2.9777435901  | -4.6118754095 | 6.2061778148  |
| C  | 2.3790782042  | -4.0259967629 | 4.2285409375  |
| H  | 1.3664849568  | -3.7848980429 | 4.5388195646  |
| Cl | 0.1855117146  | -0.6045867272 | 5.396051612   |

XYZ coordinates of the optimized structure of **3Br**

103

|    |               |               |               |
|----|---------------|---------------|---------------|
| Pd | 0.0643464723  | 0.0950620844  | -0.1487606478 |
| P  | 2.0737834684  | 1.3890723999  | -0.0212971384 |
| Cl | 0.0013706086  | -0.0237935758 | -2.6135062357 |
| Sb | 0.096355507   | 0.160494612   | 2.4303811901  |
| P  | -2.0914971425 | 1.1043079643  | 0.0755541208  |
| P  | 0.2690159945  | -2.2789115405 | 0.2068571     |
| C  | 2.2658434191  | 0.4100853177  | 2.6274853878  |
| C  | 2.9478605364  | 1.0000845425  | 1.5528369279  |
| C  | 4.3111946149  | 1.2919625011  | 1.6968715624  |
| H  | 4.841704231   | 1.7902435365  | 0.8904479487  |
| C  | 5.0038362926  | 0.928322777   | 2.8453750693  |
| H  | 6.0642221379  | 1.148499944   | 2.9302146735  |

|   |               |               |               |
|---|---------------|---------------|---------------|
| C | 4.3339815282  | 0.272651689   | 3.8733373366  |
| H | 4.8681986553  | -0.0425141918 | 4.7652839372  |
| C | 2.9663935844  | 0.03306718    | 3.7738141923  |
| H | 2.4434797249  | -0.4282402473 | 4.6020400515  |
| C | 3.2705757704  | 1.0010949865  | -1.3512659326 |
| C | 3.0822479617  | 1.6087681559  | -2.6010014779 |
| H | 2.2808703823  | 2.3283992493  | -2.7411596528 |
| C | 3.9172556592  | 1.3006902951  | -3.6699360905 |
| H | 3.7622823307  | 1.7877483664  | -4.6286766328 |
| C | 4.9416548301  | 0.3683988102  | -3.5139692765 |
| H | 5.5943178745  | 0.129131395   | -4.3489783177 |
| C | 5.12043762    | -0.2574425966 | -2.2831753574 |
| H | 5.9134633426  | -0.9889929599 | -2.1518529734 |
| C | 4.2888079745  | 0.0527812549  | -1.208716053  |
| H | 4.4400765829  | -0.4499699268 | -0.2591966878 |
| C | 2.0770956225  | 3.2331241162  | -0.0086737705 |
| C | 0.9545592352  | 3.9034240935  | 0.486324334   |
| H | 0.0804789497  | 3.3370744405  | 0.7916624297  |
| C | 0.9444315978  | 5.2924768262  | 0.5926110108  |
| H | 0.0626367265  | 5.7942738027  | 0.9815070237  |
| C | 2.0554116476  | 6.029704596   | 0.193457023   |
| H | 2.0475952445  | 7.1135739343  | 0.2686538632  |
| C | 3.1777620626  | 5.3721470861  | -0.3082654318 |
| H | 4.0477323564  | 5.9412502817  | -0.624678748  |
| C | 3.1920815168  | 3.9838834368  | -0.4062544002 |
| H | 4.0716913702  | 3.4879069177  | -0.806396101  |
| C | -1.2107848107 | 1.8915660829  | 2.6442729967  |
| C | -2.117885486  | 2.1397837803  | 1.6023016274  |
| C | -2.9863135823 | 3.2335999037  | 1.7073924423  |
| H | -3.7016711866 | 3.4302873211  | 0.9143031677  |
| C | -2.9213557117 | 4.0932397704  | 2.799139017   |
| H | -3.5905851853 | 4.9472138385  | 2.8540889811  |
| C | -1.9888769188 | 3.8629337753  | 3.8055729879  |
| H | -1.9122801108 | 4.5421519713  | 4.6499983941  |
| C | -1.1473276721 | 2.7551818228  | 3.7377025032  |
| H | -0.4486122345 | 2.561580182   | 4.5426886163  |
| C | -2.5893379254 | 2.2820328723  | -1.2395676359 |
| C | -1.5845050694 | 2.9604091059  | -1.9378661475 |
| H | -0.5440788306 | 2.7234737239  | -1.7392481696 |
| C | -1.9143199151 | 3.9135636161  | -2.8977163444 |
| H | -1.124102105  | 4.4320922137  | -3.4338263064 |
| C | -3.2502269189 | 4.1871592245  | -3.18209241   |
| H | -3.5067723036 | 4.9244043665  | -3.937952027  |
| C | -4.2573170459 | 3.5059805013  | -2.5016516001 |
| H | -5.3014890478 | 3.7110463503  | -2.7216081433 |
| C | -3.9308493533 | 2.5592772873  | -1.5337369658 |
| H | -4.7254881097 | 2.0334069912  | -1.011666091  |
| C | -3.5568824276 | 0.0178916402  | 0.2481966063  |
| C | -4.0463864255 | -0.639995557  | -0.8899854921 |

|    |               |               |               |
|----|---------------|---------------|---------------|
| H  | -3.6083214208 | -0.4373774638 | -1.8648375548 |
| C  | -5.1028730123 | -1.5384513008 | -0.7853509479 |
| H  | -5.477035733  | -2.0339878083 | -1.677078126  |
| C  | -5.6783630322 | -1.8016378897 | 0.4574213668  |
| H  | -6.5021030197 | -2.5052688435 | 0.5387856895  |
| C  | -5.1951590366 | -1.1561473324 | 1.5920834429  |
| H  | -5.6401023918 | -1.3528688571 | 2.563653184   |
| C  | -4.1416223217 | -0.2488649294 | 1.4905437162  |
| H  | -3.781315913  | 0.2527666876  | 2.3842984777  |
| C  | -0.9123102654 | -1.7559826044 | 2.6933276767  |
| C  | -0.772792817  | -2.6945934883 | 1.6616443966  |
| C  | -1.4495909836 | -3.9157216541 | 1.7547390834  |
| H  | -1.3326787989 | -4.6561554762 | 0.9685628211  |
| C  | -2.2873007665 | -4.1801377628 | 2.8344098917  |
| H  | -2.8218810906 | -5.1246263547 | 2.883514552   |
| C  | -2.4412772199 | -3.2318872385 | 3.8401552112  |
| H  | -3.1065293847 | -3.4224691228 | 4.6777649519  |
| C  | -1.7430001807 | -2.0274810711 | 3.779453091   |
| H  | -1.8455161627 | -1.3051472983 | 4.5803454691  |
| C  | -0.3284713919 | -3.426461294  | -1.0895056184 |
| C  | -1.445919125  | -3.0449823623 | -1.8395352999 |
| H  | -1.8842552696 | -2.0658931704 | -1.6807465276 |
| C  | -1.9823224058 | -3.9064675513 | -2.7914941429 |
| H  | -2.8508925113 | -3.5983397827 | -3.3672752899 |
| C  | -1.3971767684 | -5.1509266523 | -3.0168154395 |
| H  | -1.8097189853 | -5.8194090337 | -3.7675873186 |
| C  | -0.2781526336 | -5.5338941074 | -2.2810778948 |
| H  | 0.182767513   | -6.5030375572 | -2.4515428388 |
| C  | 0.25391209    | -4.6788438609 | -1.3180364282 |
| H  | 1.122955615   | -4.9906687317 | -0.7462805199 |
| C  | 1.9092756943  | -2.972609388  | 0.6491421116  |
| C  | 2.9246892348  | -2.9243370834 | -0.315890387  |
| H  | 2.7248012621  | -2.491072412  | -1.2931824618 |
| C  | 4.1894373408  | -3.4291112719 | -0.0322880895 |
| H  | 4.9642647449  | -3.3951016873 | -0.7935735727 |
| C  | 4.4639765828  | -3.9688805312 | 1.2242711421  |
| H  | 5.4540520523  | -4.3573239555 | 1.446215358   |
| C  | 3.4647396768  | -4.0070069945 | 2.1922031033  |
| H  | 3.6700716499  | -4.425115064  | 3.1738792566  |
| C  | 2.1905426914  | -3.5173091167 | 1.9064607192  |
| H  | 1.4174954699  | -3.564925811  | 2.6681593199  |
| Br | 0.1134731094  | 0.1838948887  | 5.3093801623  |

XYZ coordinates of the optimized structure of **3Br'**

103

|    |               |               |               |
|----|---------------|---------------|---------------|
| Pd | -0.1064611024 | 0.3132865253  | -0.3780674326 |
| P  | 2.215925932   | 0.5032033323  | -0.1866583672 |
| Cl | -0.1784231302 | 0.9245387612  | -2.6938408042 |
| Sb | -0.047686365  | -0.3921719751 | 2.0407439806  |

|   |               |               |               |
|---|---------------|---------------|---------------|
| P | -2.3854957118 | 0.6110929952  | 0.0631370468  |
| P | 1.5716917936  | -3.1746712928 | 1.6400393212  |
| C | 1.9053993807  | 0.2537169977  | 2.6284912243  |
| C | 2.755810131   | 0.6126343077  | 1.5696299923  |
| C | 4.0400445083  | 1.0860180187  | 1.8629464313  |
| H | 4.7025698064  | 1.3923111752  | 1.0572870234  |
| C | 4.4737255272  | 1.1758279427  | 3.1830410089  |
| H | 5.4730515389  | 1.5443467903  | 3.3957653271  |
| C | 3.6290717476  | 0.7951073572  | 4.2213833137  |
| H | 3.9640890339  | 0.8597673064  | 5.2528603603  |
| C | 2.341833345   | 0.333675179   | 3.9495654521  |
| H | 1.6899788501  | 0.0264978158  | 4.766888618   |
| C | 3.2299368389  | -0.7792350229 | -0.9891669973 |
| C | 2.9881467939  | -1.0362196467 | -2.3464559525 |
| H | 2.2124961924  | -0.4838346995 | -2.8723999392 |
| C | 3.7399768843  | -1.9954290162 | -3.0167226705 |
| H | 3.5522300079  | -2.1852908763 | -4.0697347616 |
| C | 4.7270245518  | -2.7109854774 | -2.339938044  |
| H | 5.3129621775  | -3.4598519778 | -2.865306296  |
| C | 4.9593884251  | -2.4666515903 | -0.9888876719 |
| H | 5.726366518   | -3.0226109185 | -0.4568606572 |
| C | 4.2132238516  | -1.5047438072 | -0.3097807522 |
| H | 4.4000104155  | -1.3259841247 | 0.7448489744  |
| C | 2.7755004703  | 2.0946893564  | -0.8858365179 |
| C | 2.0464442834  | 3.2457227141  | -0.5594368208 |
| H | 1.1548203154  | 3.1674684154  | 0.058807325   |
| C | 2.4554403403  | 4.4881177949  | -1.0294270602 |
| H | 1.8858547223  | 5.3763269419  | -0.7710877126 |
| C | 3.5878857803  | 4.5910990311  | -1.837586373  |
| H | 3.9029177877  | 5.5618319331  | -2.2098445845 |
| C | 4.3108412792  | 3.4493594866  | -2.1696609716 |
| H | 5.1923512659  | 3.5247018474  | -2.8000654575 |
| C | 3.9099161488  | 2.2014772835  | -1.6944657902 |
| H | 4.4800516402  | 1.3158144159  | -1.9591283941 |
| C | -1.598983316  | 0.9175707737  | 2.7415385738  |
| C | -2.5290051651 | 1.3105095876  | 1.7602062471  |
| C | -3.5759431292 | 2.1693911503  | 2.1100392486  |
| H | -4.2950586547 | 2.4875503047  | 1.3600139639  |
| C | -3.6944515551 | 2.626654568   | 3.4211776423  |
| H | -4.5048047388 | 3.3013109046  | 3.6820842315  |
| C | -2.7881749331 | 2.212601258   | 4.3931150852  |
| H | -2.8895153962 | 2.5597621587  | 5.4175288784  |
| C | -1.7426884817 | 1.3514523909  | 4.0592253684  |
| H | -1.0654230162 | 0.993519425   | 4.8329669211  |
| C | -3.247350722  | 1.7903329734  | -1.0207730083 |
| C | -2.7518036205 | 3.0977541636  | -1.1140242061 |
| H | -1.8788004195 | 3.3941129008  | -0.537804301  |
| C | -3.3721412581 | 4.0190723317  | -1.9488283001 |
| H | -2.9856090071 | 5.0320339836  | -2.0142628708 |



|   |               |               |               |
|---|---------------|---------------|---------------|
| C | -4.4803052967 | 3.6402657851  | -2.7072520024 |
| H | -4.9602575784 | 4.3606482359  | -3.3635796778 |
| C | -4.9668721893 | 2.3390148195  | -2.6268835301 |
| H | -5.8270138873 | 2.0391579916  | -3.2186145382 |
| C | -4.3537727324 | 1.4119267012  | -1.7855814542 |
| H | -4.739398124  | 0.3984054588  | -1.7269913525 |
| C | -3.3695345748 | -0.9221128658 | 0.0683942157  |
| C | -2.9037166335 | -2.0051317069 | -0.6864631532 |
| H | -1.9762113462 | -1.9127332436 | -1.247054142  |
| C | -3.6228594312 | -3.1969592292 | -0.714782415  |
| H | -3.2551821221 | -4.0346308242 | -1.3003535089 |
| C | -4.803157993  | -3.3145765885 | 0.0156878392  |
| H | -5.3600460452 | -4.2471554731 | 0.0000941164  |
| C | -5.2680346982 | -2.2401750383 | 0.7728034626  |
| H | -6.1855093326 | -2.3334382908 | 1.3467619977  |
| C | -4.5557220876 | -1.045066791  | 0.8016748326  |
| H | -4.9186357678 | -0.2151977064 | 1.4021646826  |
| C | -0.7347903303 | -2.25992233   | 2.8247648268  |
| C | 0.0184398571  | -3.4134449014 | 2.5824677406  |
| C | -0.452845478  | -4.6416109622 | 3.0567090908  |
| H | 0.1195308281  | -5.5475743848 | 2.8776801497  |
| C | -1.6584277226 | -4.709416642  | 3.7477617545  |
| H | -2.0207102034 | -5.6683417442 | 4.1075188816  |
| C | -2.401432377  | -3.5526872165 | 3.9798549322  |
| H | -3.3400873457 | -3.6067436924 | 4.5236459134  |
| C | -1.9401171903 | -2.3206089205 | 3.525785478   |
| H | -2.5141404184 | -1.4218769174 | 3.7292794274  |
| C | 1.5443469448  | -4.5221892441 | 0.4007569083  |
| C | 1.1108627263  | -4.1824320913 | -0.887174092  |
| H | 0.8644960169  | -3.1477672903 | -1.1160646235 |
| C | 1.0023735938  | -5.1565057687 | -1.876821108  |
| H | 0.6653484374  | -4.879827951  | -2.8720998414 |
| C | 1.3380330052  | -6.4778518209 | -1.5919509801 |
| H | 1.2600026693  | -7.2380508452 | -2.3643590744 |
| C | 1.782581504   | -6.8232746256 | -0.3165860795 |
| H | 2.0496780761  | -7.8525350515 | -0.0926985176 |
| C | 1.8853229229  | -5.8528645858 | 0.6763177225  |
| H | 2.2423867345  | -6.1314557107 | 1.6642641044  |
| C | 2.8666698927  | -3.6365437022 | 2.8494514814  |
| C | 4.0966330349  | -4.1512623461 | 2.4153679815  |
| H | 4.2499642226  | -4.3812809867 | 1.3641872629  |
| C | 5.124554909   | -4.3865930853 | 3.3244377173  |
| H | 6.0674403909  | -4.7978855017 | 2.9736922147  |
| C | 4.9444622306  | -4.0997611689 | 4.6758072264  |
| H | 5.7463280475  | -4.2854939045 | 5.3850918333  |
| C | 3.7319098206  | -3.5707457986 | 5.1118486312  |
| H | 3.5828238215  | -3.3368936349 | 6.1626690325  |
| C | 2.6985132787  | -3.3338915533 | 4.2087641534  |
| H | 1.7672870212  | -2.9068837221 | 4.5766684239  |

Br 0.0442323568 -0.9927553075 6.4071372109

XYZ coordinates of the optimized structure of **3CN**

104

|    |               |               |               |
|----|---------------|---------------|---------------|
| Pd | 0.0705255994  | 0.0732151131  | -0.1168278028 |
| P  | 2.0794635495  | 1.366923268   | 0.0024115412  |
| Cl | 0.0396787714  | -0.0981924663 | -2.5981527208 |
| Sb | 0.0846655004  | 0.1665331788  | 2.4871587823  |
| P  | -2.0711928307 | 1.1229786432  | 0.0552150713  |
| P  | 0.2547762923  | -2.2907738967 | 0.2302110413  |
| C  | 2.2364511954  | 0.5167761845  | 2.68970873    |
| C  | 2.937958959   | 1.0555431789  | 1.6032110243  |
| C  | 4.2883032268  | 1.3924624455  | 1.7664091845  |
| H  | 4.8326510075  | 1.8501165671  | 0.9450613069  |
| C  | 4.9489966288  | 1.1345420107  | 2.9619468111  |
| H  | 6.0002486011  | 1.3885740794  | 3.0644481356  |
| C  | 4.2587217225  | 0.5504141836  | 4.0196097659  |
| H  | 4.7679718231  | 0.3305494506  | 4.9537169319  |
| C  | 2.9029909527  | 0.2617893061  | 3.8900608591  |
| H  | 2.3695993856  | -0.1559518389 | 4.7370350815  |
| C  | 3.3042035768  | 0.9528519909  | -1.2934201971 |
| C  | 3.1311107902  | 1.511589138   | -2.5681372679 |
| H  | 2.3198077225  | 2.2103435055  | -2.7500573822 |
| C  | 3.9931672126  | 1.1807829647  | -3.6083452948 |
| H  | 3.8490905989  | 1.6295775844  | -4.5872714544 |
| C  | 5.0313099128  | 0.2746915772  | -3.3977254961 |
| H  | 5.7055615865  | 0.0180344325  | -4.2101551634 |
| C  | 5.1956085242  | -0.3030629346 | -2.1418483734 |
| H  | 5.9985606119  | -1.0145909702 | -1.9682025577 |
| C  | 4.3358288941  | 0.0290442609  | -1.0963531652 |
| H  | 4.474702008   | -0.4387688616 | -0.1271718718 |
| C  | 2.0671385031  | 3.2122761359  | -0.0314308244 |
| C  | 0.9531261485  | 3.878889163   | 0.488217824   |
| H  | 0.0959019464  | 3.3077211412  | 0.8316128858  |
| C  | 0.9285277625  | 5.269176589   | 0.5692893002  |
| H  | 0.0536602492  | 5.7676226243  | 0.9777937198  |
| C  | 2.0158248283  | 6.0124966971  | 0.1185424032  |
| H  | 1.9962422923  | 7.0974770023  | 0.172860325   |
| C  | 3.129187435   | 5.3589342813  | -0.4071456377 |
| H  | 3.9811339516  | 5.9322882986  | -0.7626709867 |
| C  | 3.1588995858  | 3.9688229441  | -0.4780357686 |
| H  | 4.0329984207  | 3.4757909573  | -0.8935261975 |
| C  | -1.290876302  | 1.8486058769  | 2.6686338627  |
| C  | -2.1519621877 | 2.131910809   | 1.5987300515  |
| C  | -3.0386502156 | 3.2100481624  | 1.7085148751  |
| H  | -3.7168689641 | 3.4366269325  | 0.8913031923  |
| C  | -3.0456748571 | 4.0140545801  | 2.8441153658  |
| H  | -3.7289389747 | 4.8565344851  | 2.9041728137  |
| C  | -2.1733598001 | 3.7397701106  | 3.8925771683  |

|   |               |               |               |
|---|---------------|---------------|---------------|
| H | -2.1611932265 | 4.3707301814  | 4.7768412734  |
| C | -1.3089313584 | 2.6506541642  | 3.8109619036  |
| H | -0.6479163405 | 2.4354342093  | 4.6439787191  |
| C | -2.5180485301 | 2.3199482879  | -1.2621499274 |
| C | -1.4837886676 | 2.9492078785  | -1.9629721217 |
| H | -0.4557280392 | 2.6656156536  | -1.7615974433 |
| C | -1.7689787186 | 3.9118060422  | -2.9280647178 |
| H | -0.9554166551 | 4.3911272199  | -3.4657576255 |
| C | -3.0905424736 | 4.2446280985  | -3.2147898811 |
| H | -3.3129849567 | 4.9894718029  | -3.9740497935 |
| C | -4.1281837647 | 3.6120244347  | -2.5328634636 |
| H | -5.1618203573 | 3.8623836191  | -2.755806104  |
| C | -3.845594701  | 2.6552821288  | -1.5613822692 |
| H | -4.6642480864 | 2.1646619098  | -1.0419345307 |
| C | -3.5597403054 | 0.055997801   | 0.1708093623  |
| C | -4.0705694086 | -0.5307761176 | -0.9963558343 |
| H | -3.6363617845 | -0.284828339  | -1.9628734404 |
| C | -5.140662657  | -1.4175051539 | -0.9308146903 |
| H | -5.5300201696 | -1.8572873883 | -1.8450716761 |
| C | -5.7100649893 | -1.7399236354 | 0.3002700761  |
| H | -6.544827364  | -2.4333862893 | 0.3505896803  |
| C | -5.2061804608 | -1.1654952878 | 1.4642625436  |
| H | -5.6464574569 | -1.4073971943 | 2.4277700676  |
| C | -4.138640208  | -0.2714304188 | 1.4021537004  |
| H | -3.7642936838 | 0.1758221511  | 2.3188332081  |
| C | -0.8182127382 | -1.7979438309 | 2.7684735501  |
| C | -0.6996463819 | -2.7363478683 | 1.7361797514  |
| C | -1.3130964142 | -3.9863311134 | 1.8748592974  |
| H | -1.213729045  | -4.7260899279 | 1.0855044677  |
| C | -2.0634756755 | -4.2834338329 | 3.0090362601  |
| H | -2.5501822071 | -5.2508710678 | 3.0954361869  |
| C | -2.1887742811 | -3.3415009519 | 4.0252477058  |
| H | -2.7814425597 | -3.5626304592 | 4.908557874   |
| C | -1.5535393249 | -2.1061281235 | 3.9131574273  |
| H | -1.6424355646 | -1.3879255229 | 4.7218433026  |
| C | -0.4266027355 | -3.4177709899 | -1.0439622736 |
| C | -1.5835578233 | -3.0168001233 | -1.7195091876 |
| H | -2.0001662239 | -2.0347916878 | -1.5237239455 |
| C | -2.1883962222 | -3.8619104462 | -2.6445031833 |
| H | -3.088227652  | -3.5380327124 | -3.1607009645 |
| C | -1.6327840009 | -5.1102626806 | -2.9186127429 |
| H | -2.0989212992 | -5.7662929563 | -3.6487736306 |
| C | -0.4745518004 | -5.5127833229 | -2.2579515069 |
| H | -0.0358572851 | -6.4847706197 | -2.4667723858 |
| C | 0.1258282103  | -4.6737170884 | -1.3210864822 |
| H | 1.0251516526  | -5.0013747292 | -0.8078603961 |
| C | 1.9149502556  | -3.0033059004 | 0.5583891805  |
| C | 2.8666123413  | -2.9549195489 | -0.4698509407 |
| H | 2.6098545728  | -2.5080211699 | -1.4276447776 |

|   |              |               |               |
|---|--------------|---------------|---------------|
| C | 4.1404660301 | -3.478510598  | -0.2746241043 |
| H | 4.864070389  | -3.4442348832 | -1.0845348067 |
| C | 4.4904707627 | -4.0343980279 | 0.9556702679  |
| H | 5.487819654  | -4.4375685617 | 1.1080206587  |
| C | 3.5569531178 | -4.0690213677 | 1.9874309202  |
| H | 3.8212555942 | -4.4989002305 | 2.9497928839  |
| C | 2.2727433455 | -3.5622351902 | 1.7899862564  |
| H | 1.5500547648 | -3.61078786   | 2.5994704318  |
| C | 0.0929041335 | 0.2178616239  | 4.805538665   |
| N | 0.0785573305 | 0.2280718405  | 5.9722187087  |

XYZ coordinates of the optimized structure of **3CN**<sup>1</sup>

104

|    |               |               |               |
|----|---------------|---------------|---------------|
| Pd | -0.0219600531 | -0.0129841286 | 0.0117273288  |
| P  | 2.2576403984  | 0.3811993578  | 0.0262192618  |
| Cl | -0.2397709685 | -0.2753511575 | -2.4367020241 |
| Sb | 0.1053633069  | -0.1507786968 | 2.6103542172  |
| P  | -2.2800255876 | 0.3791411132  | 0.3660824395  |
| P  | 1.6191035068  | -3.0755535391 | 1.5974338083  |
| C  | 2.1746283638  | 0.5253259165  | 2.8523280913  |
| C  | 2.9429256292  | 0.7061621803  | 1.6976565717  |
| C  | 4.2468988616  | 1.2066258933  | 1.8091439397  |
| H  | 4.8429635016  | 1.3653853789  | 0.9137767211  |
| C  | 4.7853425018  | 1.5116999769  | 3.0540408509  |
| H  | 5.7970972766  | 1.9004297457  | 3.1256118381  |
| C  | 4.0192292502  | 1.3226797715  | 4.2002030765  |
| H  | 4.4277405549  | 1.5619091032  | 5.1780605823  |
| C  | 2.7190761925  | 0.8326704164  | 4.0994440579  |
| H  | 2.1326690954  | 0.6921161135  | 5.0014095617  |
| C  | 3.4131573955  | -0.785956076  | -0.7730006294 |
| C  | 3.243878362   | -1.0433282872 | -2.1410716189 |
| H  | 2.4391875205  | -0.5570418078 | -2.685973921  |
| C  | 4.0890379924  | -1.9333235033 | -2.7960307479 |
| H  | 3.9505533603  | -2.121395782  | -3.8571047778 |
| C  | 5.1035617039  | -2.5831539413 | -2.0953216911 |
| H  | 5.7642423049  | -3.276046017  | -2.6089759591 |
| C  | 5.2648184361  | -2.3443722412 | -0.7329526625 |
| H  | 6.0517360024  | -2.8493502284 | -0.178980586  |
| C  | 4.4220768727  | -1.4530915409 | -0.0705098308 |
| H  | 4.5551789716  | -1.2831566808 | 0.9934738339  |
| C  | 2.5584294715  | 1.9863610209  | -0.813824306  |
| C  | 1.6895450854  | 3.0435363407  | -0.5121075739 |
| H  | 0.8585785687  | 2.877379714   | 0.1703988244  |
| C  | 1.8858807456  | 4.3004720577  | -1.0736511001 |
| H  | 1.2073231061  | 5.1129366996  | -0.8283512771 |
| C  | 2.9465583131  | 4.5136378272  | -1.9535363712 |
| H  | 3.0962492031  | 5.493245089   | -2.3988099216 |
| C  | 3.8116104086  | 3.467400716   | -2.2604485936 |
| H  | 4.6402183905  | 3.6270243035  | -2.9449254473 |

|   |               |               |               |
|---|---------------|---------------|---------------|
| C | 3.6236033359  | 2.2087338356  | -1.6910697042 |
| H | 4.3067374123  | 1.4018270469  | -1.938902725  |
| C | -1.5630453673 | 1.2063206818  | 2.9512327849  |
| C | -2.5075824153 | 1.3311796444  | 1.9213653001  |
| C | -3.5997227579 | 2.1914860181  | 2.0870663792  |
| H | -4.3337244898 | 2.2965379234  | 1.2921742757  |
| C | -3.7390733828 | 2.9347999663  | 3.2562150483  |
| H | -4.5818868338 | 3.6109987952  | 3.3680123477  |
| C | -2.7961967797 | 2.8138732265  | 4.2725584543  |
| H | -2.8942469895 | 3.4003274916  | 5.1818600969  |
| C | -1.7188464301 | 1.9413032576  | 4.1257536301  |
| H | -1.0005071797 | 1.8370298038  | 4.9334956628  |
| C | -3.016565506  | 1.4636265831  | -0.9086021109 |
| C | -2.3699476755 | 2.6699233762  | -1.206830527  |
| H | -1.4474891272 | 2.9324649417  | -0.6952508753 |
| C | -2.8957882074 | 3.5294586706  | -2.1637557902 |
| H | -2.3873054082 | 4.4632675088  | -2.386964723  |
| C | -4.0653751874 | 3.1875165755  | -2.8433868384 |
| H | -4.4722243771 | 3.8569800212  | -3.5961264906 |
| C | -4.7053005972 | 1.9851808327  | -2.5596173582 |
| H | -5.6135397395 | 1.7110436144  | -3.0891004383 |
| C | -4.1853755051 | 1.1236788858  | -1.5938858604 |
| H | -4.6918717364 | 0.1872591218  | -1.3797122715 |
| C | -3.3938626105 | -1.0637304023 | 0.4639368358  |
| C | -3.0484816456 | -2.1976873281 | -0.281410507  |
| H | -2.1319581966 | -2.1978513444 | -0.8673727249 |
| C | -3.8760941444 | -3.3170077514 | -0.2728322725 |
| H | -3.6015032868 | -4.1936077309 | -0.8527973804 |
| C | -5.0464933854 | -3.3142356896 | 0.4833668305  |
| H | -5.6890362855 | -4.1903483786 | 0.4933825951  |
| C | -5.3905341088 | -2.1900980374 | 1.2317191518  |
| H | -6.3000097269 | -2.1871304195 | 1.8261904296  |
| C | -4.5684080606 | -1.0664019558 | 1.2237777248  |
| H | -4.8403909302 | -0.1972780968 | 1.8164614363  |
| C | -0.6773053253 | -2.16009493   | 2.8702090988  |
| C | -0.0290353327 | -3.2953642049 | 2.3749347336  |
| C | -0.6407165884 | -4.5474192896 | 2.5269336141  |
| H | -0.1455792435 | -5.4358538248 | 2.1432241791  |
| C | -1.8734085653 | -4.6618556297 | 3.158403455   |
| H | -2.3400230401 | -5.6375317415 | 3.263057606   |
| C | -2.5047731988 | -3.5257960262 | 3.6638803596  |
| H | -3.4668834559 | -3.6100803117 | 4.1615682758  |
| C | -1.9056081917 | -2.2776324963 | 3.5272609236  |
| H | -2.4014602498 | -1.4003570538 | 3.9364111766  |
| C | 1.567176761   | -4.2857042676 | 0.2167627187  |
| C | 1.0826207561  | -3.8151014182 | -1.0113108543 |
| H | 0.802835736   | -2.7688306654 | -1.1212473537 |
| C | 0.9585151511  | -4.6763146544 | -2.0988284391 |
| H | 0.5793169527  | -4.2958840148 | -3.0436836313 |

|   |              |               |               |
|---|--------------|---------------|---------------|
| C | 1.3312423923 | -6.0134276894 | -1.9781658666 |
| H | 1.2416836666 | -6.6838293031 | -2.8287463603 |
| C | 1.8253820263 | -6.4871985133 | -0.7645205642 |
| H | 2.1192156596 | -7.5288632703 | -0.6645478436 |
| C | 1.9409435625 | -5.6307253658 | 0.3282572938  |
| H | 2.329051523  | -6.0120085352 | 1.2690571184  |
| C | 2.7475968246 | -3.8381970642 | 2.8306558969  |
| C | 4.0409779593 | -4.21568178   | 2.4375481439  |
| H | 4.3282027206 | -4.1545096653 | 1.3908066412  |
| C | 4.9601150382 | -4.6820205509 | 3.3724199753  |
| H | 5.9528644035 | -4.9811579617 | 3.0462461902  |
| C | 4.6115594835 | -4.7634505858 | 4.7194550354  |
| H | 5.3304976409 | -5.1249295487 | 5.4495288829  |
| C | 3.3366866015 | -4.375947792  | 5.1229983864  |
| H | 3.0550263353 | -4.4323175348 | 6.1711410134  |
| C | 2.4105158307 | -3.9171613165 | 4.1881126781  |
| H | 1.4204162626 | -3.6190104048 | 4.5218980784  |
| C | 0.1256701183 | -0.3080907554 | 4.9571076456  |
| N | 0.0770743142 | -0.5154267125 | 6.1055325878  |

XYZ coordinates of the optimized structure of **3SCN**

105

|    |               |               |               |
|----|---------------|---------------|---------------|
| Pd | -0.0618921166 | -0.0193670155 | -0.2251399043 |
| P  | 2.0932286791  | 1.2749854753  | 0.0724367166  |
| Cl | -0.1425834099 | -0.180906536  | -2.6241738623 |
| Sb | -0.0714920362 | 0.0616906289  | 2.232829967   |
| P  | -2.1010404241 | 1.2829402502  | -0.0195528475 |
| P  | 0.1497068482  | -2.3970703385 | 0.1699594793  |
| C  | 1.8012478581  | 0.8478083944  | 2.859630884   |
| C  | 2.6129090856  | 1.373109072   | 1.8427540999  |
| C  | 3.7939973553  | 2.0323246957  | 2.2103399822  |
| H  | 4.4207685795  | 2.4839554348  | 1.445671936   |
| C  | 4.1690054185  | 2.1212879729  | 3.5477078389  |
| H  | 5.0905252126  | 2.6320175254  | 3.8121489385  |
| C  | 3.366787186   | 1.5666890738  | 4.5432784958  |
| H  | 3.6407721171  | 1.6301927335  | 5.5925778021  |
| C  | 2.1734632198  | 0.936915143   | 4.2022727203  |
| H  | 1.5449657898  | 0.5359356449  | 4.9929947251  |
| C  | 3.5085213735  | 0.5542618275  | -0.8357051964 |
| C  | 3.3863771332  | 0.4475152392  | -2.2298509041 |
| H  | 2.4620547591  | 0.7443730116  | -2.7184112394 |
| C  | 4.4355887548  | -0.0584411597 | -2.9907300841 |
| H  | 4.3319877114  | -0.1220340842 | -4.0704695378 |
| C  | 5.6063845776  | -0.4901906071 | -2.3706750282 |
| H  | 6.4251682488  | -0.8857780884 | -2.9653615708 |
| C  | 5.7152230339  | -0.4293796816 | -0.9842779253 |
| H  | 6.6152390292  | -0.785209405  | -0.490530637  |
| C  | 4.6743613103  | 0.0898871872  | -0.2174005509 |
| H  | 4.7784014883  | 0.1244094965  | 0.862070165   |

|   |               |               |               |
|---|---------------|---------------|---------------|
| C | 2.115507012   | 3.0633672933  | -0.3638836792 |
| C | 1.3583441035  | 3.9317568042  | 0.436883815   |
| H | 0.8061909568  | 3.5484885664  | 1.2919987383  |
| C | 1.3091735416  | 5.2917807203  | 0.1550685724  |
| H | 0.7242013484  | 5.9506181169  | 0.7906294892  |
| C | 2.0040880725  | 5.8054295885  | -0.9396925529 |
| H | 1.9634057941  | 6.8679505506  | -1.1620942391 |
| C | 2.7510708443  | 4.9498960225  | -1.7432864722 |
| H | 3.3014554682  | 5.3409747349  | -2.5946128495 |
| C | 2.8109095235  | 3.5854651768  | -1.4580923425 |
| H | 3.4115691386  | 2.9370726909  | -2.0880117656 |
| C | -1.6009805858 | 1.4491343352  | 2.7601910613  |
| C | -2.3350590971 | 1.9732463149  | 1.6830403919  |
| C | -3.2776256933 | 2.9736836037  | 1.9455435468  |
| H | -3.8510525925 | 3.4083896384  | 1.1331053303  |
| C | -3.4842773056 | 3.4278557669  | 3.2450152398  |
| H | -4.2150416921 | 4.2102572706  | 3.4283223429  |
| C | -2.7627860722 | 2.8836584316  | 4.3043814052  |
| H | -2.9272620433 | 3.2355628332  | 5.3186095853  |
| C | -1.8143241693 | 1.892176463   | 4.0669794052  |
| H | -1.2518368015 | 1.4809686022  | 4.9039112954  |
| C | -2.3330335456 | 2.678176385   | -1.1773412986 |
| C | -1.2124922496 | 3.2082999564  | -1.8225662941 |
| H | -0.2378407184 | 2.7623288966  | -1.6563694999 |
| C | -1.3468527148 | 4.2889687551  | -2.6912779445 |
| H | -0.467064394  | 4.69207303    | -3.1845358397 |
| C | -2.6022535598 | 4.8404129526  | -2.930242955  |
| H | -2.7076441324 | 5.6806051697  | -3.6110356077 |
| C | -3.7283565086 | 4.3039925417  | -2.3069329511 |
| H | -4.7122534344 | 4.7215849709  | -2.5014285857 |
| C | -3.5983205925 | 3.2248072381  | -1.4388291124 |
| H | -4.4873142898 | 2.7977049086  | -0.9827426619 |
| C | -3.6175331354 | 0.2834473655  | -0.2591432094 |
| C | -4.048743868  | 0.0020188729  | -1.5633087765 |
| H | -3.5174951786 | 0.4192841157  | -2.4144148461 |
| C | -5.1592171582 | -0.8104704132 | -1.7745202744 |
| H | -5.4904534242 | -1.0111273346 | -2.7896919042 |
| C | -5.8413783104 | -1.363026438  | -0.6914370317 |
| H | -6.7083349114 | -1.9959306791 | -0.8584300841 |
| C | -5.4080433764 | -1.0994597506 | 0.6058651462  |
| H | -5.9349008753 | -1.5250316144 | 1.4552910977  |
| C | -4.3021187938 | -0.2804612241 | 0.8239575796  |
| H | -3.9816195722 | -0.0777933173 | 1.8423171415  |
| C | -0.4059675494 | -1.9284338104 | 2.9029138533  |
| C | -0.3439881022 | -2.8902831924 | 1.8825843976  |
| C | -0.6164520627 | -4.2246730452 | 2.2033622791  |
| H | -0.5856415639 | -4.9860414833 | 1.4287276623  |
| C | -0.9326933303 | -4.5824108425 | 3.5113155669  |
| H | -1.1487009369 | -5.6208876528 | 3.7450610564  |

|   |               |               |               |
|---|---------------|---------------|---------------|
| C | -0.9682343448 | -3.6190492548 | 4.5168710109  |
| H | -1.208025582  | -3.9022843454 | 5.537586532   |
| C | -0.7044300289 | -2.2839951671 | 4.2187937989  |
| H | -0.729914651  | -1.5396404213 | 5.0128835156  |
| C | -0.8453983943 | -3.4882662863 | -0.9057131406 |
| C | -2.1182012944 | -3.0594434401 | -1.2948525129 |
| H | -2.4664576114 | -2.0711112834 | -1.0094484882 |
| C | -2.9315843121 | -3.8884856687 | -2.0610497025 |
| H | -3.9177721362 | -3.5434182976 | -2.3581038076 |
| C | -2.4766517917 | -5.1453046817 | -2.4551209413 |
| H | -3.1096861438 | -5.7883076602 | -3.0603166499 |
| C | -1.2053181203 | -5.5730382417 | -2.0795575003 |
| H | -0.8435880317 | -6.5500410113 | -2.3877412657 |
| C | -0.3896473297 | -4.7500930328 | -1.306592592  |
| H | 0.6021265502  | -5.0905508017 | -1.0231846842 |
| C | 1.8523909841  | -3.0419184978 | 0.0054900002  |
| C | 2.4536504126  | -2.9728441847 | -1.2594722278 |
| H | 1.9080961673  | -2.5446084584 | -2.0969611585 |
| C | 3.7439040731  | -3.4543504871 | -1.4455843043 |
| H | 4.1992924311  | -3.4003047438 | -2.429766669  |
| C | 4.4559902015  | -3.9868772315 | -0.3709638181 |
| H | 5.4659886581  | -4.3590320681 | -0.5185946122 |
| C | 3.8737544203  | -4.0326256969 | 0.8919692181  |
| H | 4.4253420016  | -4.4396463021 | 1.7348749756  |
| C | 2.5740807797  | -3.564694874  | 1.0831476597  |
| H | 2.1277648422  | -3.6176909459 | 2.0716729528  |
| S | -0.4255623883 | 0.1868853394  | 7.2346374575  |
| C | 1.1519113487  | 0.6119043332  | 7.5403542839  |
| N | 2.2716014482  | 0.9134930647  | 7.7447437375  |

XYZ coordinates of the optimized structure of **3SCN'**  
105

|    |               |               |               |
|----|---------------|---------------|---------------|
| Pd | 0.0018254303  | 0.1794561876  | -0.3222043652 |
| P  | 2.2822255375  | 0.6004224159  | 0.0708220583  |
| Cl | 0.1082573546  | 0.71596195    | -2.6504507168 |
| Sb | -0.1029485649 | -0.363023465  | 2.1283731209  |
| P  | -2.3248148384 | 0.3300640686  | -0.097140448  |
| P  | 1.5086558122  | -3.1153641962 | 1.7153812422  |
| C  | 1.7357964301  | 0.428068984   | 2.8514781311  |
| C  | 2.6695975519  | 0.7777836501  | 1.8639133009  |
| C  | 3.9040381298  | 1.3082839238  | 2.2572668398  |
| H  | 4.6338862316  | 1.6026282593  | 1.5072475321  |
| C  | 4.2010649178  | 1.4695294189  | 3.6079827871  |
| H  | 5.162479231   | 1.8830936259  | 3.898603048   |
| C  | 3.2708023896  | 1.1115689639  | 4.5811953969  |
| H  | 3.4787882383  | 1.2447824288  | 5.6395802281  |
| C  | 2.0351863772  | 0.5869669965  | 4.2046165457  |
| H  | 1.315721578   | 0.3199490852  | 4.9750262808  |
| C  | 3.4698507134  | -0.5954652525 | -0.616108458  |



|   |               |               |               |
|---|---------------|---------------|---------------|
| C | 3.4628265934  | -0.7992453191 | -2.0046055633 |
| H | 2.7763842217  | -0.2356712609 | -2.6320324058 |
| C | 4.325562736   | -1.729791738  | -2.5742078182 |
| H | 4.3200354793  | -1.8782112015 | -3.6503062995 |
| C | 5.188398528   | -2.4724926096 | -1.767670692  |
| H | 5.8581305391  | -3.2012675341 | -2.2153486062 |
| C | 5.1882405662  | -2.2812473231 | -0.3885993098 |
| H | 5.8519446041  | -2.8616329815 | 0.2459525588  |
| C | 4.3320344993  | -1.345225834  | 0.1897666257  |
| H | 4.337524853   | -1.2084455605 | 1.2664647962  |
| C | 2.7463670467  | 2.2279953932  | -0.6110584197 |
| C | 1.8526504909  | 3.2900651203  | -0.4250318695 |
| H | 0.897574343   | 3.1148208551  | 0.0652981972  |
| C | 2.1803893527  | 4.5650924599  | -0.8712484047 |
| H | 1.4829515074  | 5.3844550613  | -0.7221458901 |
| C | 3.3969244731  | 4.787534126   | -1.5161766423 |
| H | 3.6493150912  | 5.7828030423  | -1.8709151947 |
| C | 4.28531746    | 3.7333877907  | -1.7083483269 |
| H | 5.233142693   | 3.9022130103  | -2.2115585207 |
| C | 3.9658097903  | 2.4546010756  | -1.2550865627 |
| H | 4.6655033624  | 1.6384549166  | -1.4099754031 |
| C | -1.7787751826 | 0.8888246816  | 2.6081757362  |
| C | -2.6592728239 | 1.1213947852  | 1.5339704306  |
| C | -3.7872881056 | 1.9242454935  | 1.732595838   |
| H | -4.4687607932 | 2.1213021271  | 0.9094667399  |
| C | -4.0333387455 | 2.4872576491  | 2.9832356482  |
| H | -4.9077971191 | 3.1155427114  | 3.1255507376  |
| C | -3.1634366387 | 2.2492437923  | 4.0431001692  |
| H | -3.3524733814 | 2.6933926322  | 5.0161447322  |
| C | -2.0378891731 | 1.445286761   | 3.8613150727  |
| H | -1.3712959456 | 1.2681964743  | 4.7041709206  |
| C | -3.1467890099 | 1.3964836292  | -1.3208434123 |
| C | -2.7642474201 | 2.7418595276  | -1.4069815133 |
| H | -2.0069043511 | 3.1399157112  | -0.7363094656 |
| C | -3.3521462108 | 3.5733633721  | -2.3522476984 |
| H | -3.0549887989 | 4.6164607872  | -2.4104271535 |
| C | -4.3130317917 | 3.0671377142  | -3.2281105864 |
| H | -4.7674904687 | 3.7178675917  | -3.9697702107 |
| C | -4.6854331744 | 1.7283769134  | -3.1540783793 |
| H | -5.4307128151 | 1.3293864613  | -3.83614942   |
| C | -4.1051449307 | 0.8906564652  | -2.2030315224 |
| H | -4.40151524   | -0.1527704154 | -2.1510353351 |
| C | -3.2340442581 | -1.2480423745 | -0.0927088567 |
| C | -2.6679871522 | -2.3430121072 | -0.7557892916 |
| H | -1.6939287912 | -2.2466022646 | -1.2300760771 |
| C | -3.3491545231 | -3.5570110779 | -0.8026742202 |
| H | -2.9015382854 | -4.4028402624 | -1.3156244952 |
| C | -4.5881886894 | -3.6851426291 | -0.1796452519 |
| H | -5.1156204894 | -4.6343668019 | -0.2106153185 |

|   |               |               |               |
|---|---------------|---------------|---------------|
| C | -5.1501833733 | -2.5997775157 | 0.4913172631  |
| H | -6.1131129169 | -2.7010154426 | 0.9836443198  |
| C | -4.4784519868 | -1.3821734848 | 0.5356512732  |
| H | -4.9201123029 | -0.5421626908 | 1.0649289624  |
| C | -0.5724790851 | -2.1445257857 | 3.2185484619  |
| C | 0.2465283951  | -3.2675165737 | 3.0316140146  |
| C | 0.0501301296  | -4.3896863186 | 3.8424629361  |
| H | 0.701646331   | -5.2536512744 | 3.7368255627  |
| C | -0.972313946  | -4.4000856844 | 4.7883155661  |
| H | -1.1180042959 | -5.2755823608 | 5.4145567824  |
| C | -1.80762637   | -3.2946929022 | 4.9333513698  |
| H | -2.6033740348 | -3.3053724082 | 5.6722757761  |
| C | -1.6109065682 | -2.1589133125 | 4.1500227166  |
| H | -2.2497775712 | -1.2916502077 | 4.2896600378  |
| C | 0.9038022142  | -4.1775185337 | 0.3499748956  |
| C | 1.3774909971  | -3.8769898512 | -0.9350306142 |
| H | 2.0634497545  | -3.045705132  | -1.0796882574 |
| C | 0.9778076742  | -4.6372328243 | -2.0310283802 |
| H | 1.356265151   | -4.3953559634 | -3.0204144057 |
| C | 0.0904750405  | -5.6979102217 | -1.8582188171 |
| H | -0.2250794014 | -6.289142378  | -2.713450238  |
| C | -0.3937980834 | -5.996199171  | -0.5858949869 |
| H | -1.0876970889 | -6.8207101744 | -0.4457910054 |
| C | 0.0093473544  | -5.2413867919 | 0.5135380641  |
| H | -0.3822871257 | -5.4809931515 | 1.4977272413  |
| C | 2.9548289064  | -4.0083976634 | 2.3980484668  |
| C | 3.3967988508  | -5.24354627   | 1.9135258944  |
| H | 2.855501494   | -5.7388099641 | 1.1122434198  |
| C | 4.5322587822  | -5.8438473563 | 2.4556283733  |
| H | 4.8658564486  | -6.8045696657 | 2.0726373596  |
| C | 5.2330107919  | -5.2198556447 | 3.4842314569  |
| H | 6.1168991037  | -5.6907428123 | 3.9054549673  |
| C | 4.799637779   | -3.9865983883 | 3.9704546075  |
| H | 5.3435544895  | -3.492817684  | 4.7709512894  |
| C | 3.6733077227  | -3.3793476422 | 3.4258271223  |
| H | 3.3499106581  | -2.4111080689 | 3.8034125148  |
| S | -0.4726527353 | 0.3783218391  | 7.3186738146  |
| C | 1.095045109   | 0.840794782   | 7.6149026192  |
| N | 2.2096397615  | 1.1655606493  | 7.8146239477  |

XYZ coordinates of the optimized structure of [3]BMe<sub>4</sub>  
119

|    |               |               |               |
|----|---------------|---------------|---------------|
| Pd | -0.0235812149 | -0.048445498  | 0.0276795572  |
| P  | -2.3121740763 | 0.326796656   | 0.3776788565  |
| Cl | -0.0796104434 | -0.0206128126 | -2.3541230525 |
| Sb | 0.0599316705  | -0.0032812368 | 2.5392596026  |
| P  | 2.3068187729  | 0.2399902448  | 0.1389975949  |
| P  | 1.4374371117  | -2.8679820599 | 2.800237429   |
| C  | -1.4599324875 | 1.4969487078  | 2.7953605222  |

|   |               |               |               |
|---|---------------|---------------|---------------|
| C | -2.4230961082 | 1.5344055891  | 1.7683356288  |
| C | -3.460199365  | 2.4706557232  | 1.8315825065  |
| H | -4.2024689799 | 2.5163601971  | 1.0395251594  |
| C | -3.5386757774 | 3.3587761924  | 2.9021497554  |
| H | -4.3439932303 | 4.0865090215  | 2.937548181   |
| C | -2.5885124395 | 3.3173775177  | 3.9177976257  |
| H | -2.6449697526 | 4.0162431857  | 4.7472676446  |
| C | -1.5536177674 | 2.3837455079  | 3.8685798548  |
| H | -0.8163285326 | 2.369913232   | 4.6665371442  |
| C | -3.1991418138 | 1.1066614522  | -1.004675211  |
| C | -2.726937655  | 2.3292058628  | -1.5011622402 |
| H | -1.8550235276 | 2.8016968196  | -1.0554971108 |
| C | -3.3698200553 | 2.939948053   | -2.5707581525 |
| H | -3.0020653494 | 3.8893156573  | -2.9489986822 |
| C | -4.4756699099 | 2.329400742   | -3.1632885486 |
| H | -4.9728837523 | 2.8060067592  | -4.0032770234 |
| C | -4.9377239456 | 1.1081709827  | -2.68219691   |
| H | -5.7955956651 | 0.6274925897  | -3.1434182218 |
| C | -4.3028370489 | 0.4939163121  | -1.6040398138 |
| H | -4.6702222471 | -0.4583248811 | -1.2333608214 |
| C | -3.3007371477 | -1.1161870989 | 0.8856806217  |
| C | -2.8596831127 | -2.3920642893 | 0.5155956674  |
| H | -1.9302540533 | -2.5084563177 | -0.0370564049 |
| C | -3.6084239225 | -3.5147483583 | 0.8608870184  |
| H | -3.2573045938 | -4.5013439444 | 0.5741867431  |
| C | -4.790421072  | -3.3691717809 | 1.5829109443  |
| H | -5.3705345266 | -4.2458874084 | 1.8566623972  |
| C | -5.2282782405 | -2.1006102511 | 1.9613537394  |
| H | -6.1472840494 | -1.9866684095 | 2.5290358603  |
| C | -4.4886129633 | -0.9745272025 | 1.6144839401  |
| H | -4.8348583469 | 0.0104959019  | 1.915738721   |
| C | 2.0086677149  | 0.7745421079  | 2.9140541726  |
| C | 2.8658496921  | 0.8100159238  | 1.8034309754  |
| C | 4.1653321267  | 1.3060006221  | 1.9635093603  |
| H | 4.836430759   | 1.3606718775  | 1.110230597   |
| C | 4.6053986215  | 1.7352100207  | 3.2122296994  |
| H | 5.6162504854  | 2.1159281623  | 3.3233916819  |
| C | 3.7542642425  | 1.6783742734  | 4.313400642   |
| H | 4.0982295366  | 2.0149201859  | 5.2870154839  |
| C | 2.4548615755  | 1.197093421   | 4.1674618137  |
| H | 1.8013552888  | 1.1565455292  | 5.0345920097  |
| C | 2.8647029124  | 1.5795717735  | -0.9654167235 |
| C | 2.0961130838  | 2.7490443044  | -1.0219249441 |
| H | 1.1686140133  | 2.8178216098  | -0.4579274062 |
| C | 2.5112510549  | 3.8187301627  | -1.8065732952 |
| H | 1.9105936982  | 4.7229092584  | -1.8467877814 |
| C | 3.6888380712  | 3.7253531419  | -2.5482483716 |
| H | 4.0079621319  | 4.5591486128  | -3.1670639935 |
| C | 4.4517350737  | 2.5622054089  | -2.4997250307 |

|   |               |               |               |
|---|---------------|---------------|---------------|
| H | 5.3678366389  | 2.4846609884  | -3.0782388567 |
| C | 4.0450225174  | 1.4892043292  | -1.7086525036 |
| H | 4.6455873477  | 0.5846671467  | -1.6778639639 |
| C | 3.3049774152  | -1.2211642148 | -0.286930871  |
| C | 3.1125270961  | -1.7876498823 | -1.5564851603 |
| H | 2.3994237143  | -1.343114602  | -2.2468730661 |
| C | 3.8268443632  | -2.9226379351 | -1.9252364148 |
| H | 3.6787276243  | -3.3527892595 | -2.9116166668 |
| C | 4.7230312446  | -3.5091651783 | -1.0310430816 |
| H | 5.275888014   | -4.3982385609 | -1.3206002163 |
| C | 4.9057210048  | -2.9563906195 | 0.233566175   |
| H | 5.5957912311  | -3.4128037057 | 0.9374272154  |
| C | 4.200159781   | -1.8138515002 | 0.6085084508  |
| H | 4.3484657789  | -1.395629481  | 1.5989442981  |
| C | -0.4101673929 | -1.3493287207 | 4.1361704811  |
| C | 0.3210863538  | -2.5436116401 | 4.2137328179  |
| C | 0.1490211306  | -3.3706278441 | 5.3279720273  |
| H | 0.7343908939  | -4.2820312732 | 5.4212776211  |
| C | -0.7689244902 | -3.0278589333 | 6.3182828671  |
| H | -0.899725991  | -3.6771322288 | 7.1792140957  |
| C | -1.5232489285 | -1.8615582122 | 6.2061515344  |
| H | -2.2415663676 | -1.6010689147 | 6.9780062774  |
| C | -1.3463461031 | -1.0133142437 | 5.1142949956  |
| H | -1.9236063732 | -0.0955245563 | 5.0447190076  |
| C | 2.9055641568  | -3.6469336851 | 3.5683009281  |
| C | 3.2100315084  | -5.0056610221 | 3.4388764727  |
| H | 2.544496953   | -5.661954638  | 2.8851761384  |
| C | 4.3678462743  | -5.5226729738 | 4.0180011301  |
| H | 4.5942738649  | -6.5801760261 | 3.9126147251  |
| C | 5.2281303911  | -4.6912450894 | 4.7301233418  |
| H | 6.1298047408  | -5.0972438985 | 5.1800235838  |
| C | 4.9323375556  | -3.3345363131 | 4.8606043218  |
| H | 5.6028386766  | -2.6799960358 | 5.4106758836  |
| C | 3.7831180021  | -2.8125566084 | 4.27665983    |
| H | 3.567465097   | -1.7496982304 | 4.3708235782  |
| C | 0.63208937    | -4.2097737567 | 1.8501941242  |
| C | 0.983679225   | -4.3155448693 | 0.4969679377  |
| H | 1.6971413374  | -3.6175691502 | 0.0651527026  |
| C | 0.4279486512  | -5.3124810836 | -0.3003760417 |
| H | 0.7125687     | -5.3861288764 | -1.3463294591 |
| C | -0.4944830427 | -6.2058464888 | 0.2412973022  |
| H | -0.9315917344 | -6.9815402035 | -0.3813104599 |
| C | -0.8572969264 | -6.1001967667 | 1.5826960073  |
| H | -1.5775522028 | -6.7931690418 | 2.0090324326  |
| C | -0.2981284346 | -5.1081023168 | 2.3851772469  |
| H | -0.5953637961 | -5.034377952  | 3.4271098647  |
| B | 0.2950614664  | 2.5762973116  | 8.1207074338  |
| C | 0.9451226533  | 3.6035733886  | 7.0030060148  |
| C | -1.3415350023 | 2.4929423846  | 7.9182838781  |

|   |               |              |              |
|---|---------------|--------------|--------------|
| C | 0.9456139957  | 1.0708346941 | 7.9273195473 |
| C | 0.6292674603  | 3.1346195173 | 9.6375827275 |
| H | -1.8300924793 | 1.8379406547 | 8.6610314768 |
| H | -1.6342760807 | 2.0941176168 | 6.9300487649 |
| H | -1.8380149722 | 3.4754316375 | 8.0081108545 |
| H | 2.0410356483  | 3.7024763758 | 7.1003537457 |
| H | 0.5416568706  | 4.6290570468 | 7.0725756723 |
| H | 0.7684340326  | 3.2838357951 | 5.959676051  |
| H | 0.2283346898  | 2.4793840941 | 10.430839599 |
| H | 0.2031827246  | 4.1353494699 | 9.8288608381 |
| H | 1.7116794837  | 3.2243895195 | 9.8371414122 |
| H | 0.5840122018  | 0.3455005042 | 8.6772129651 |
| H | 2.0476730715  | 1.0617830452 | 8.0024490363 |
| H | 0.6998791768  | 0.6258907985 | 6.9457754257 |

XYZ coordinates of the optimized structure of **4**

102

|    |               |               |               |
|----|---------------|---------------|---------------|
| Pd | -0.0100769693 | 0.0217909676  | -0.0198259934 |
| P  | -2.3142798977 | 0.362305891   | 0.2902595284  |
| Cl | 0.0021427093  | 0.1601582293  | -2.3899242493 |
| As | -0.0105172826 | -0.0111343055 | 2.3244005817  |
| P  | 2.2903092705  | 0.4349015795  | 0.1667132332  |
| P  | 1.3616551596  | -2.8899805003 | 2.0270759615  |
| C  | -1.3214880157 | 1.3865059506  | 2.6955986262  |
| C  | -2.3425138221 | 1.5053107377  | 1.7334594337  |
| C  | -3.3269462997 | 2.4820836723  | 1.8959917734  |
| H  | -4.1108174374 | 2.5932586536  | 1.1517811377  |
| C  | -3.2917765169 | 3.3332235645  | 2.9995544969  |
| H  | -4.0549610332 | 4.0973420829  | 3.1126621112  |
| C  | -2.2779520245 | 3.2144961173  | 3.9452575926  |
| H  | -2.2438030362 | 3.8878743722  | 4.7964194037  |
| C  | -1.2933514237 | 2.2375832338  | 3.7986322551  |
| H  | -0.499690937  | 2.1637745185  | 4.5361844647  |
| C  | -3.2030573079 | 1.2306619192  | -1.0358430267 |
| C  | -2.6629483827 | 2.4218563329  | -1.5390937425 |
| H  | -1.7272193936 | 2.8087196715  | -1.144036077  |
| C  | -3.3188828284 | 3.1076242029  | -2.5540267596 |
| H  | -2.8971893132 | 4.0316649523  | -2.9386078498 |
| C  | -4.5058369458 | 2.6028019629  | -3.08578997   |
| H  | -5.0126754917 | 3.1372521951  | -3.8841752781 |
| C  | -5.0364502692 | 1.4120526988  | -2.598827169  |
| H  | -5.9576629734 | 1.0134071783  | -3.0136888643 |
| C  | -4.389250977  | 0.7235563342  | -1.5743058113 |
| H  | -4.8101242499 | -0.204088174  | -1.198163326  |
| C  | -3.3340538842 | -1.0691812762 | 0.7588192471  |
| C  | -2.9904887357 | -2.3277296151 | 0.2520269756  |
| H  | -2.1130493809 | -2.4424303887 | -0.3799760691 |
| C  | -3.7712048341 | -3.4380258954 | 0.5647112223  |
| H  | -3.4980507176 | -4.4117169465 | 0.1697836871  |

|   |               |               |               |
|---|---------------|---------------|---------------|
| C | -4.8844337853 | -3.2991661351 | 1.3901400079  |
| H | -5.4877178926 | -4.1679077384 | 1.6380401505  |
| C | -5.2231432309 | -2.0484858798 | 1.904449419   |
| H | -6.0882639208 | -1.9398113796 | 2.5522060091  |
| C | -4.4529566983 | -0.9332153047 | 1.5902726465  |
| H | -4.7215635365 | 0.0380906603  | 1.9967775191  |
| C | 1.7490517639  | 0.5391898269  | 2.9256558897  |
| C | 2.7166659459  | 0.7341447563  | 1.9311224242  |
| C | 3.992904584   | 1.1703011919  | 2.3000319362  |
| H | 4.7501551739  | 1.3459812825  | 1.5404254859  |
| C | 4.3010371974  | 1.3773505692  | 3.6419273426  |
| H | 5.2958721273  | 1.7131914745  | 3.9185016693  |
| C | 3.3427395733  | 1.1472545889  | 4.6268601216  |
| H | 3.5887259139  | 1.2991802807  | 5.6734764937  |
| C | 2.0633906826  | 0.7252489699  | 4.2726715199  |
| H | 1.3256444401  | 0.5341477814  | 5.0476104511  |
| C | 2.7400909587  | 2.0029985689  | -0.6488220116 |
| C | 1.8465895843  | 3.0760131949  | -0.5380206959 |
| H | 0.8979776633  | 2.9398719218  | -0.023401284  |
| C | 2.167529447   | 4.311800452   | -1.0879576545 |
| H | 1.4701762446  | 5.1398104228  | -0.9982545907 |
| C | 3.3769428159  | 4.4830463382  | -1.760887104  |
| H | 3.6234386682  | 5.4466082848  | -2.1976430909 |
| C | 4.2662853872  | 3.418287682   | -1.876050544  |
| H | 5.2085322962  | 3.5476076101  | -2.4007923002 |
| C | 3.954005456   | 2.1794966272  | -1.3195382164 |
| H | 4.6536273516  | 1.3546040241  | -1.4165815752 |
| C | 3.4409569527  | -0.8226791623 | -0.4640875054 |
| C | 3.4318033397  | -1.0818673456 | -1.8431760546 |
| H | 2.7719542097  | -0.5191783237 | -2.4983629118 |
| C | 4.259000121   | -2.0682054118 | -2.3696657985 |
| H | 4.2518445688  | -2.2593183348 | -3.4388973885 |
| C | 5.0897509747  | -2.8090266472 | -1.5296022376 |
| H | 5.7334156196  | -3.5797731622 | -1.9438773911 |
| C | 5.0920269914  | -2.5618615997 | -0.1591828158 |
| H | 5.7322116674  | -3.1399789472 | 0.5009592529  |
| C | 4.2692899939  | -1.5730498232 | 0.3767769765  |
| H | 4.2741232363  | -1.3960371217 | 1.4474648412  |
| C | -0.5443641104 | -1.486914695  | 3.4813289665  |
| C | 0.1338626688  | -2.7143006965 | 3.3855160435  |
| C | -0.1619747029 | -3.7130552121 | 4.3179126714  |
| H | 0.3846567789  | -4.6519286085 | 4.2904953948  |
| C | -1.1420447299 | -3.5142982487 | 5.2874585339  |
| H | -1.3627900534 | -4.3035318884 | 6.0003850245  |
| C | -1.8401718018 | -2.3112282399 | 5.3402709574  |
| H | -2.6085411792 | -2.1557338871 | 6.0917463592  |
| C | -1.5406680465 | -1.2914181746 | 4.4400622594  |
| H | -2.0717668412 | -0.3464017163 | 4.5034643426  |
| C | 2.6435493707  | -3.9561721216 | 2.7888460861  |

|   |               |               |               |
|---|---------------|---------------|---------------|
| C | 3.0262033751  | -5.1917700924 | 2.2566562055  |
| H | 2.5019266358  | -5.5996734363 | 1.397163485   |
| C | 4.0777570834  | -5.9087430333 | 2.8264471356  |
| H | 4.361832764   | -6.8690444046 | 2.4044735903  |
| C | 4.7570865328  | -5.4023477109 | 3.9306148659  |
| H | 5.5745789433  | -5.9641712125 | 4.3737467035  |
| C | 4.3863373857  | -4.1678977368 | 4.4637616203  |
| H | 4.9140435557  | -3.7640260472 | 5.3235800965  |
| C | 3.3442873592  | -3.4457549566 | 3.8929012303  |
| H | 3.0721095721  | -2.4779298482 | 4.3100718415  |
| C | 0.5210025424  | -3.9693685614 | 0.8043076199  |
| C | 0.6775641414  | -3.6288426991 | -0.5454764881 |
| H | 1.2655190395  | -2.7554278324 | -0.8171251687 |
| C | 0.0795997007  | -4.3966299163 | -1.5439347019 |
| H | 0.2069347929  | -4.1184634369 | -2.5864407702 |
| C | -0.6809894343 | -5.511844946  | -1.2018271902 |
| H | -1.1481285661 | -6.1115928811 | -1.9780992695 |
| C | -0.8430236628 | -5.8583096205 | 0.1398501767  |
| H | -1.4352750489 | -6.7283921193 | 0.4102963876  |
| C | -0.2475784382 | -5.0918672937 | 1.1374586908  |
| H | -0.3888642715 | -5.3703628353 | 2.1776307677  |

XYZ coordinates of the optimized structure of **4F**

103

|    |               |               |               |
|----|---------------|---------------|---------------|
| Pd | 0.0626461593  | 0.1054509394  | -0.169758082  |
| P  | 2.035667303   | 1.4201565824  | -0.0355965945 |
| Cl | 0.0409352829  | 0.0208412176  | -2.672071316  |
| As | 0.0686501755  | 0.1676314147  | 2.3082903157  |
| P  | -2.1107157464 | 1.0505041704  | 0.0240023696  |
| P  | 0.3291822377  | -2.2527981199 | 0.1479590087  |
| C  | 2.0377038727  | 0.3652667184  | 2.5598931701  |
| C  | 2.8153082915  | 0.9716697288  | 1.5643261762  |
| C  | 4.1703106189  | 1.2239338485  | 1.8130440875  |
| H  | 4.7695926814  | 1.7306109189  | 1.0619040386  |
| C  | 4.7667239111  | 0.8078198696  | 2.9971729097  |
| H  | 5.823803417   | 0.9933188302  | 3.1657659293  |
| C  | 4.0042295417  | 0.1467954492  | 3.9559149558  |
| H  | 4.4632874076  | -0.2000593866 | 4.8775076392  |
| C  | 2.6427872756  | -0.0532844174 | 3.750546697   |
| H  | 2.0435012275  | -0.5231301126 | 4.51873045    |
| C  | 3.2856810733  | 1.0342639023  | -1.3159671009 |
| C  | 3.1747899916  | 1.6728432595  | -2.5593426485 |
| H  | 2.4028008279  | 2.4200464022  | -2.7199841817 |
| C  | 4.0470844649  | 1.3589302293  | -3.596345684  |
| H  | 3.9509913627  | 1.8688832496  | -4.5509429617 |
| C  | 5.03457855    | 0.3921704752  | -3.4137732113 |
| H  | 5.7169205527  | 0.1484317979  | -4.2234435484 |
| C  | 5.1371978334  | -0.2629866652 | -2.1895690865 |
| H  | 5.8996122205  | -1.0226871142 | -2.0381915514 |

|   |               |               |               |
|---|---------------|---------------|---------------|
| C | 4.266333174   | 0.0513085109  | -1.1478815703 |
| H | 4.3559884142  | -0.4767523737 | -0.2041959845 |
| C | 2.0743481677  | 3.2635850027  | 0.0078777769  |
| C | 0.9261541785  | 3.9514441766  | 0.4113099581  |
| H | 0.0207540792  | 3.3977289882  | 0.6383753054  |
| C | 0.9331586369  | 5.339916984   | 0.5278699861  |
| H | 0.0310929335  | 5.8564331008  | 0.8444382325  |
| C | 2.0879470025  | 6.058295911   | 0.2323555081  |
| H | 2.0939880197  | 7.1416048288  | 0.3163184268  |
| C | 3.2370659322  | 5.3829941099  | -0.1771959852 |
| H | 4.1412755902  | 5.9377731644  | -0.4130135014 |
| C | 3.2330290339  | 3.9956885413  | -0.2870445429 |
| H | 4.1334268675  | 3.4853017872  | -0.6172719618 |
| C | -1.0775044743 | 1.7739703142  | 2.5211029004  |
| C | -2.0456541507 | 2.0685231945  | 1.5520500066  |
| C | -2.8749474458 | 3.1820110038  | 1.7294317552  |
| H | -3.6355731776 | 3.4096358675  | 0.9880074544  |
| C | -2.7089349429 | 4.0221088605  | 2.8259646988  |
| H | -3.3446055228 | 4.8959339693  | 2.9384911213  |
| C | -1.720330069  | 3.7448009775  | 3.7659283556  |
| H | -1.5713329669 | 4.4058082085  | 4.6151692054  |
| C | -0.9214538527 | 2.6127218404  | 3.6281782943  |
| H | -0.1756623995 | 2.3794251994  | 4.3773059336  |
| C | -2.6450417257 | 2.251227986   | -1.2563832447 |
| C | -1.6582284638 | 2.9409438966  | -1.9696670099 |
| H | -0.6132911483 | 2.6970897221  | -1.8049800821 |
| C | -2.0126391731 | 3.9118057005  | -2.9027674505 |
| H | -1.2365168281 | 4.4381596173  | -3.4518053806 |
| C | -3.3553213005 | 4.1931341414  | -3.1448660824 |
| H | -3.6310666056 | 4.944353114   | -3.880008321  |
| C | -4.3445846499 | 3.5017336566  | -2.4487815984 |
| H | -5.394008047  | 3.7132874686  | -2.6354365345 |
| C | -3.9933318135 | 2.5366741657  | -1.5078156123 |
| H | -4.7737754466 | 2.003192937   | -0.9722043482 |
| C | -3.5899344525 | -0.0093184767 | 0.2410134372  |
| C | -4.0902563776 | -0.6985780922 | -0.8738246771 |
| H | -3.6456583882 | -0.54106854   | -1.8539932979 |
| C | -5.1656925564 | -1.570033509  | -0.7407160294 |
| H | -5.5469180985 | -2.0909998858 | -1.6148005707 |
| C | -5.7513190458 | -1.7741828889 | 0.5086462979  |
| H | -6.590002613  | -2.4569654391 | 0.6125107358  |
| C | -5.2588236551 | -1.0968087246 | 1.6203678657  |
| H | -5.7118089255 | -1.2474878681 | 2.5965553627  |
| C | -4.1850427229 | -0.2171987469 | 1.4894501379  |
| H | -3.815851222  | 0.3100780153  | 2.364450557   |
| C | -0.8360637145 | -1.5793588474 | 2.5841014536  |
| C | -0.6853813644 | -2.5969464237 | 1.6344639944  |
| C | -1.3312332325 | -3.8219619143 | 1.8300904279  |
| H | -1.2052323789 | -4.6181631333 | 1.1017692475  |



|   |               |               |               |
|---|---------------|---------------|---------------|
| C | -2.1534179964 | -4.0184880301 | 2.9354240756  |
| H | -2.667554436  | -4.9668046906 | 3.0647506216  |
| C | -2.3174243093 | -2.996785967  | 3.8658739076  |
| H | -2.9665601342 | -3.1381152759 | 4.7256481852  |
| C | -1.6465866044 | -1.7870645124 | 3.7036963773  |
| H | -1.7538715803 | -1.002546571  | 4.4416825083  |
| C | -0.3215824748 | -3.4305864528 | -1.0969638366 |
| C | -1.4106985831 | -3.02735433   | -1.8765660892 |
| H | -1.7896509184 | -2.0163780464 | -1.7738204908 |
| C | -1.9867378154 | -3.9047743717 | -2.7906543297 |
| H | -2.8312603683 | -3.5780500168 | -3.3914980714 |
| C | -1.4709588499 | -5.1895525369 | -2.9468855889 |
| H | -1.9144561534 | -5.871407946  | -3.6674491245 |
| C | -0.3797348066 | -5.5957869928 | -2.1819225196 |
| H | 0.0280674056  | -6.5961722182 | -2.2995413373 |
| C | 0.1925540306  | -4.7231757575 | -1.2588284455 |
| H | 1.0412612254  | -5.0517292973 | -0.6658409626 |
| C | 1.9653329306  | -2.9724520534 | 0.5637540936  |
| C | 2.9456849831  | -3.005531038  | -0.4380551656 |
| H | 2.7215916189  | -2.6196450558 | -1.4297842832 |
| C | 4.2059320633  | -3.5313064521 | -0.173223383  |
| H | 4.9526047187  | -3.5600502393 | -0.9623355586 |
| C | 4.5121207744  | -4.0125099153 | 1.0997175793  |
| H | 5.4984138127  | -4.4187190395 | 1.3064767452  |
| C | 3.5489389833  | -3.9694651425 | 2.1035237537  |
| H | 3.7792061424  | -4.3416965283 | 3.0981653239  |
| C | 2.2795229126  | -3.4568958723 | 1.8377581016  |
| H | 1.5334597276  | -3.4418169193 | 2.6271351056  |
| F | 0.0568740897  | 0.201627983   | 4.2467603759  |

XYZ coordinates of the optimized structure of **4F'**

103

|    |               |               |               |
|----|---------------|---------------|---------------|
| Pd | -0.0593973052 | -0.2366332647 | 0.0428009477  |
| P  | 2.1837335572  | 0.2570012668  | 0.0121570591  |
| Cl | -0.3148033758 | -0.5955103081 | -2.3987273002 |
| As | 0.0801207165  | -0.2709783946 | 2.4990628009  |
| P  | -2.2943510702 | 0.2781455277  | 0.3771220269  |
| P  | 1.738460965   | -3.0639362749 | 1.486029582   |
| C  | 1.9522763601  | 0.3500169159  | 2.8065447991  |
| C  | 2.7849664712  | 0.5808297147  | 1.7052056699  |
| C  | 4.0588259077  | 1.1288762872  | 1.8969597488  |
| H  | 4.6923305544  | 1.3322557813  | 1.0370420379  |
| C  | 4.5167021691  | 1.4258109752  | 3.1752331446  |
| H  | 5.5066198332  | 1.8515661262  | 3.3119165424  |
| C  | 3.6963427635  | 1.17651114    | 4.2710690205  |
| H  | 4.0426449711  | 1.402679352   | 5.2757198397  |
| C  | 2.4222888605  | 0.6437870382  | 4.0914742161  |
| H  | 1.7856810315  | 0.4497628949  | 4.9434261333  |
| C  | 3.4181735007  | -0.8118532406 | -0.8061107117 |

|   |               |               |               |
|---|---------------|---------------|---------------|
| C | 3.2375545721  | -1.0944902562 | -2.1676224358 |
| H | 2.3789509012  | -0.6867983507 | -2.694727023  |
| C | 4.1412971445  | -1.9120682179 | -2.8401109421 |
| H | 3.9925769993  | -2.1195683039 | -3.8961637501 |
| C | 5.2242289084  | -2.4676394603 | -2.1620104313 |
| H | 5.9285032888  | -3.1061723047 | -2.688031     |
| C | 5.3967504192  | -2.2067800997 | -0.8045782373 |
| H | 6.234794016   | -2.6422926937 | -0.2668175886 |
| C | 4.4983111444  | -1.3850038455 | -0.1266572103 |
| H | 4.6400807182  | -1.1997079353 | 0.9334729737  |
| C | 2.3928158097  | 1.9082194439  | -0.7693829068 |
| C | 1.5866411482  | 2.9480892597  | -0.2835280531 |
| H | 0.8722323616  | 2.7500856425  | 0.5134092956  |
| C | 1.697671793   | 4.2314318476  | -0.8066700069 |
| H | 1.0709258776  | 5.028504661   | -0.4160269149 |
| C | 2.6074646831  | 4.4914232373  | -1.8317878365 |
| H | 2.6903743083  | 5.4924029886  | -2.245907064  |
| C | 3.4093712945  | 3.464471934   | -2.3196181886 |
| H | 4.1230456546  | 3.6599632473  | -3.1152859643 |
| C | 3.3085938404  | 2.1782441489  | -1.7891319472 |
| H | 3.9465120403  | 1.389657272   | -2.1759378229 |
| C | -1.320298851  | 1.0776613052  | 2.8616090092  |
| C | -2.3498242062 | 1.2553005786  | 1.9261896741  |
| C | -3.3476843561 | 2.206350906   | 2.1673702116  |
| H | -4.1433990887 | 2.3520855621  | 1.441245065   |
| C | -3.3059866349 | 2.9936700469  | 3.314269007   |
| H | -4.0741304336 | 3.7428737143  | 3.4835751227  |
| C | -2.2734257922 | 2.8255135677  | 4.2330605999  |
| H | -2.2292104701 | 3.4461589572  | 5.1236413521  |
| C | -1.2936305924 | 1.858982764   | 4.018259579   |
| H | -0.5073960463 | 1.7083586517  | 4.7481129001  |
| C | -2.9703815893 | 1.4230010211  | -0.8790986752 |
| C | -2.1229346574 | 2.4022590911  | -1.4117238588 |
| H | -1.077907397  | 2.4336799907  | -1.1147494117 |
| C | -2.6077501369 | 3.3203088637  | -2.3367522638 |
| H | -1.9409361183 | 4.0742338263  | -2.7461108042 |
| C | -3.9382651894 | 3.2609654325  | -2.7505516274 |
| H | -4.3133943321 | 3.973200454   | -3.4802982105 |
| C | -4.7819206826 | 2.281562744   | -2.2344783203 |
| H | -5.8175685311 | 2.225818645   | -2.5583291404 |
| C | -4.3022333664 | 1.364336757   | -1.3004582456 |
| H | -4.9674987317 | 0.601877921   | -0.9052365474 |
| C | -3.5438026328 | -1.0447376085 | 0.5136991816  |
| C | -3.3850193668 | -2.1562121869 | -0.3234156797 |
| H | -2.5314390549 | -2.2054545466 | -0.9965236776 |
| C | -4.3150228583 | -3.1907725948 | -0.2916177751 |
| H | -4.186958523  | -4.0502183226 | -0.9438021553 |
| C | -5.4008017234 | -3.128009917  | 0.5803544175  |
| H | -6.1229796812 | -3.9393845319 | 0.6081319234  |

|   |               |               |               |
|---|---------------|---------------|---------------|
| C | -5.5581273511 | -2.0270385193 | 1.4196236296  |
| H | -6.4016512141 | -1.9771464947 | 2.1027821057  |
| C | -4.6336204989 | -0.9858076351 | 1.3877591426  |
| H | -4.7588207748 | -0.1341679829 | 2.0511646732  |
| C | -0.6274539919 | -2.1136296562 | 2.6432875367  |
| C | 0.0425328731  | -3.246690737  | 2.1663100923  |
| C | -0.5885844867 | -4.4951970839 | 2.2629245931  |
| H | -0.0741562245 | -5.3790521979 | 1.8944819897  |
| C | -1.8579001283 | -4.6159523731 | 2.8149535637  |
| H | -2.3347806339 | -5.5906077846 | 2.872139308   |
| C | -2.5084655963 | -3.4843073763 | 3.3033702038  |
| H | -3.4986263159 | -3.5667202067 | 3.7425668432  |
| C | -1.8925310197 | -2.2406156811 | 3.2271855316  |
| H | -2.3981110277 | -1.367444316  | 3.6283592726  |
| C | 1.7610114461  | -4.3646779969 | 0.1881155805  |
| C | 1.2308318889  | -4.0073469948 | -1.0598979642 |
| H | 0.859740861   | -2.9968761771 | -1.2251327771 |
| C | 1.1750774353  | -4.9365944274 | -2.095119501  |
| H | 0.7575593072  | -4.645567766  | -3.0555593135 |
| C | 1.6641314049  | -6.2279154909 | -1.9050278436 |
| H | 1.6281031734  | -6.9503317431 | -2.7161062009 |
| C | 2.204038212   | -6.5873635166 | -0.6723824463 |
| H | 2.5871744665  | -7.5926482769 | -0.5167886447 |
| C | 2.2495125825  | -5.6636282242 | 0.3704835787  |
| H | 2.6693556255  | -5.9573562708 | 1.3287895011  |
| C | 2.7847145366  | -3.7524739824 | 2.8313557041  |
| C | 4.1373035831  | -4.0161340811 | 2.5615285861  |
| H | 4.5197852663  | -3.9008112553 | 1.5498965644  |
| C | 4.996229454   | -4.4348096015 | 3.5726312574  |
| H | 6.0369718778  | -4.6458895299 | 3.3407758744  |
| C | 4.5265021845  | -4.5776489589 | 4.8775109153  |
| H | 5.198524409   | -4.8995157174 | 5.6683617032  |
| C | 3.192015724   | -4.3008612339 | 5.160424864   |
| H | 2.8165043985  | -4.4048268304 | 6.17507383    |
| C | 2.3259336781  | -3.8928629461 | 4.1469464185  |
| H | 1.2872784374  | -3.6822629136 | 4.3854472866  |
| F | 0.0510816482  | -0.4970838639 | 4.4630663882  |

XYZ coordinates of the optimized structure of [4]BMe<sub>4</sub>  
119

|    |               |               |               |
|----|---------------|---------------|---------------|
| Pd | -0.0100769693 | 0.0217909676  | -0.0198259934 |
| P  | -2.3142798977 | 0.362305891   | 0.2902595284  |
| Cl | 0.0021427093  | 0.1601582293  | -2.3899242493 |
| As | -0.0105172826 | -0.0111343055 | 2.3244005817  |
| P  | 2.2903092705  | 0.4349015795  | 0.1667132332  |
| P  | 1.3616551596  | -2.8899805003 | 2.0270759615  |
| C  | -1.3214860791 | 1.3865082875  | 2.6955967743  |
| C  | -2.3425138221 | 1.5053107377  | 1.7334594337  |
| C  | -3.3269462997 | 2.4820836723  | 1.8959917734  |

|   |               |               |               |
|---|---------------|---------------|---------------|
| H | -4.1108174374 | 2.5932586536  | 1.1517811377  |
| C | -3.2917765169 | 3.3332235645  | 2.9995544969  |
| H | -4.0549610332 | 4.0973420829  | 3.1126621112  |
| C | -2.2779329041 | 3.21451814    | 3.9452392032  |
| H | -2.2438030362 | 3.8878743722  | 4.7964194037  |
| C | -1.2934327219 | 2.2374782855  | 3.798709317   |
| H | -0.4996082663 | 2.1638847369  | 4.5361080751  |
| C | -3.2030573079 | 1.2306619192  | -1.0358430267 |
| C | -2.6629483827 | 2.4218563329  | -1.5390937425 |
| H | -1.7272193936 | 2.8087196715  | -1.144036077  |
| C | -3.3188828284 | 3.1076242029  | -2.5540267596 |
| H | -2.8971893132 | 4.0316649523  | -2.9386078498 |
| C | -4.5058369458 | 2.6028019629  | -3.08578997   |
| H | -5.0126754917 | 3.1372521951  | -3.8841752781 |
| C | -5.0364502692 | 1.4120526988  | -2.598827169  |
| H | -5.9576629734 | 1.0134071783  | -3.0136888643 |
| C | -4.389250977  | 0.7235563342  | -1.5743058113 |
| H | -4.8101242499 | -0.204088174  | -1.198163326  |
| C | -3.3340538842 | -1.0691812762 | 0.7588192471  |
| C | -2.9904887357 | -2.3277296151 | 0.2520269756  |
| H | -2.1130493809 | -2.4424303887 | -0.3799760691 |
| C | -3.7712048341 | -3.4380258954 | 0.5647112223  |
| H | -3.4980507176 | -4.4117169465 | 0.1697836871  |
| C | -4.8844337853 | -3.2991661351 | 1.3901400079  |
| H | -5.4877178926 | -4.1679077384 | 1.6380401505  |
| C | -5.2231432309 | -2.0484858798 | 1.904449419   |
| H | -6.0882639208 | -1.9398113796 | 2.5522060091  |
| C | -4.4529566983 | -0.9332153047 | 1.5902726465  |
| H | -4.7215635365 | 0.0380906603  | 1.9967775191  |
| C | 1.749057778   | 0.5391713322  | 2.9256570444  |
| C | 2.7166659459  | 0.7341447563  | 1.9311224242  |
| C | 3.992904584   | 1.1703011919  | 2.3000319362  |
| H | 4.7501551739  | 1.3459812825  | 1.5404254859  |
| C | 4.3010371974  | 1.3773505692  | 3.6419273426  |
| H | 5.2958721273  | 1.7131914745  | 3.9185016693  |
| C | 3.3427484811  | 1.1472263135  | 4.6268616138  |
| H | 3.5887259139  | 1.2991802807  | 5.6734764937  |
| C | 2.063372558   | 0.72542234    | 4.2726971145  |
| H | 1.3256252132  | 0.5339915515  | 5.0476017786  |
| C | 2.7400909587  | 2.0029985689  | -0.6488220116 |
| C | 1.8465895843  | 3.0760131949  | -0.5380206959 |
| H | 0.8979776633  | 2.9398719218  | -0.023401284  |
| C | 2.167529447   | 4.311800452   | -1.0879576545 |
| H | 1.4701762446  | 5.1398104228  | -0.9982545907 |
| C | 3.3769428159  | 4.4830463382  | -1.760887104  |
| H | 3.6234386682  | 5.4466082848  | -2.1976430909 |
| C | 4.2662853872  | 3.418287682   | -1.876050544  |
| H | 5.2085322962  | 3.5476076101  | -2.4007923002 |
| C | 3.954005456   | 2.1794966272  | -1.3195382164 |

|   |               |               |               |
|---|---------------|---------------|---------------|
| H | 4.6536273516  | 1.3546040241  | -1.4165815752 |
| C | 3.4409569527  | -0.8226791623 | -0.4640875054 |
| C | 3.4318033397  | -1.0818673456 | -1.8431760546 |
| H | 2.7719542097  | -0.5191783237 | -2.4983629118 |
| C | 4.259000121   | -2.0682054118 | -2.3696657985 |
| H | 4.2518445688  | -2.2593183348 | -3.4388973885 |
| C | 5.0897509747  | -2.8090266472 | -1.5296022376 |
| H | 5.7334156196  | -3.5797731622 | -1.9438773911 |
| C | 5.0920269914  | -2.5618615997 | -0.1591828158 |
| H | 5.7322116674  | -3.1399789472 | 0.5009592529  |
| C | 4.2692899939  | -1.5730498232 | 0.3767769765  |
| H | 4.2741232363  | -1.3960371217 | 1.4474648412  |
| C | -0.5443641104 | -1.486914695  | 3.4813289665  |
| C | 0.1338626688  | -2.7143006965 | 3.3855160435  |
| C | -0.1619747029 | -3.7130552121 | 4.3179126714  |
| H | 0.3846567789  | -4.6519286085 | 4.2904953948  |
| C | -1.1420447299 | -3.5142982487 | 5.2874585339  |
| H | -1.3627900534 | -4.3035318884 | 6.0003850245  |
| C | -1.8401718018 | -2.3112282399 | 5.3402709574  |
| H | -2.6085411792 | -2.1557338871 | 6.0917463592  |
| C | -1.5406680465 | -1.2914181746 | 4.4400622594  |
| H | -2.0717668412 | -0.3464017163 | 4.5034643426  |
| C | 2.6435493707  | -3.9561721216 | 2.7888460861  |
| C | 3.0262033751  | -5.1917700924 | 2.2566562055  |
| H | 2.5019266358  | -5.5996734363 | 1.397163485   |
| C | 4.0777570834  | -5.9087430333 | 2.8264471356  |
| H | 4.361832764   | -6.8690444046 | 2.4044735903  |
| C | 4.7570865328  | -5.4023477109 | 3.9306148659  |
| H | 5.5745789433  | -5.9641712125 | 4.3737467035  |
| C | 4.3863373857  | -4.1678977368 | 4.4637616203  |
| H | 4.9140435557  | -3.7640260472 | 5.3235800965  |
| C | 3.3442873592  | -3.4457549566 | 3.8929012303  |
| H | 3.0721095721  | -2.4779298482 | 4.3100718415  |
| C | 0.5210025424  | -3.9693685614 | 0.8043076199  |
| C | 0.6775641414  | -3.6288426991 | -0.5454764881 |
| H | 1.2655190395  | -2.7554278324 | -0.8171251687 |
| C | 0.0795997007  | -4.3966299163 | -1.5439347019 |
| H | 0.2069347929  | -4.1184634369 | -2.5864407702 |
| C | -0.6809894343 | -5.511844946  | -1.2018271902 |
| H | -1.1481285661 | -6.1115928811 | -1.9780992695 |
| C | -0.8430236628 | -5.8583096205 | 0.1398501767  |
| H | -1.4352750489 | -6.7283921193 | 0.4102963876  |
| C | -0.2475784382 | -5.0918672937 | 1.1374586908  |
| H | -0.3888642715 | -5.3703628353 | 2.1776307677  |
| B | -0.0322845231 | 1.9870147103  | 8.2869089101  |
| C | 0.9195322431  | 2.9655048883  | 7.3579284205  |
| C | -1.6196032047 | 2.2377772898  | 7.9117090732  |
| C | 0.3506437339  | 0.4061363933  | 8.0042029386  |
| C | 0.2164294124  | 2.3366884955  | 9.8797349681  |

|   |               |               |               |
|---|---------------|---------------|---------------|
| H | -2.3035518353 | 1.6104778603  | 8.5099557134  |
| H | -1.851775337  | 2.0131001696  | 6.8550430333  |
| H | -1.9407001579 | 3.2810740369  | 8.0785359066  |
| H | 1.9976487981  | 2.8338751433  | 7.5603702515  |
| H | 0.712151093   | 4.0391825864  | 7.5110747935  |
| H | 0.7971170371  | 2.7903560197  | 6.2732866871  |
| H | -0.4036035315 | 1.7200878211  | 10.5536715491 |
| H | -0.0176401526 | 3.3868276288  | 10.1290752572 |
| H | 1.2616436635  | 2.1758618488  | 10.1970337914 |
| H | -0.2237904876 | -0.2919648882 | 8.6382474154  |
| H | 1.4151334008  | 0.1774222271  | 8.1905774456  |
| H | 0.1463237352  | 0.0938137492  | 6.9632136503  |

XYZ coordinates of the optimized structure of **5**  
102

|    |               |               |               |
|----|---------------|---------------|---------------|
| Pd | 0.0103160496  | -0.021125122  | 0.0188424923  |
| P  | -2.2860699829 | 0.3357295331  | 0.3685253304  |
| Cl | -0.0407840491 | 0.0653968175  | -2.349721486  |
| Bi | 0.0848542886  | -0.0555784221 | 2.5858708546  |
| P  | 2.3452772672  | 0.2400963742  | 0.1458758845  |
| P  | 1.5259148108  | -2.9556041642 | 2.8822245951  |
| C  | -1.5277445536 | 1.4461137836  | 2.8606254279  |
| C  | -2.4527040242 | 1.4890920526  | 1.802557231   |
| C  | -3.5125994416 | 2.4022744281  | 1.8594998659  |
| H  | -4.2313842555 | 2.4542654486  | 1.0463541207  |
| C  | -3.6466733421 | 3.2538726729  | 2.9539716987  |
| H  | -4.4700433164 | 3.9613729526  | 2.9843982893  |
| C  | -2.730615559  | 3.2022242231  | 4.0002531667  |
| H  | -2.8311908468 | 3.874192974   | 4.8477634878  |
| C  | -1.6730492352 | 2.2930978952  | 3.9576878968  |
| H  | -0.9576893917 | 2.2676379671  | 4.7759540314  |
| C  | -3.1804311738 | 1.145417383   | -0.991385126  |
| C  | -2.6732323874 | 2.3475552675  | -1.502678298  |
| H  | -1.7615119023 | 2.7747525937  | -1.0926961004 |
| C  | -3.331480733  | 2.9932781942  | -2.5419290751 |
| H  | -2.9354755821 | 3.9259129744  | -2.9330509043 |
| C  | -4.4886885346 | 2.4378409746  | -3.0889439257 |
| H  | -4.9977350686 | 2.9411028941  | -3.9059993116 |
| C  | -4.9870446339 | 1.2371432631  | -2.5925002261 |
| H  | -5.8853227573 | 0.7997435531  | -3.0185321382 |
| C  | -4.3366917457 | 0.5883862406  | -1.5440597135 |
| H  | -4.7324834836 | -0.3472381616 | -1.1603743498 |
| C  | -3.2325933255 | -1.1571619878 | 0.8061769739  |
| C  | -2.8054514534 | -2.3844603177 | 0.2841765153  |
| H  | -1.9205468609 | -2.4290422061 | -0.3470141416 |
| C  | -3.5112448573 | -3.5483888703 | 0.5762376786  |
| H  | -3.1710215946 | -4.4975666448 | 0.173432023   |
| C  | -4.6362997341 | -3.4939940558 | 1.3964636754  |
| H  | -5.1822540616 | -4.4038150485 | 1.6293899282  |

|   |               |               |               |
|---|---------------|---------------|---------------|
| C | -5.0594202844 | -2.275544146  | 1.9247347349  |
| H | -5.9335987314 | -2.2331340672 | 2.568062826   |
| C | -4.3619253075 | -1.1070384217 | 1.6323299223  |
| H | -4.6947313619 | -0.1611443969 | 2.0510635205  |
| C | 2.0850412478  | 0.7944612421  | 2.9362613719  |
| C | 2.9125614153  | 0.8245730348  | 1.8065143026  |
| C | 4.2105917217  | 1.3382210322  | 1.9368878426  |
| H | 4.8647272723  | 1.3914761707  | 1.0704239151  |
| C | 4.6696603866  | 1.7870462559  | 3.1714648519  |
| H | 5.6784138995  | 2.179690373   | 3.2576066321  |
| C | 3.840281157   | 1.7377640433  | 4.2896185614  |
| H | 4.1982000516  | 2.0943186394  | 5.2511601671  |
| C | 2.543751869   | 1.2393054541  | 4.1749819686  |
| H | 1.9011847785  | 1.2078599721  | 5.0507572259  |
| C | 2.9224412737  | 1.5630348823  | -0.9686534801 |
| C | 2.1852456937  | 2.7532916609  | -1.0116587976 |
| H | 1.2713342815  | 2.8485830381  | -0.4295075019 |
| C | 2.6136797021  | 3.8100656302  | -1.8063032384 |
| H | 2.037681075   | 4.730558378   | -1.8357216541 |
| C | 3.7730340054  | 3.6832890274  | -2.5716798404 |
| H | 4.1025396051  | 4.5073941141  | -3.1979849718 |
| C | 4.5043099674  | 2.4997002362  | -2.5365124931 |
| H | 5.4062544351  | 2.3962845198  | -3.1329365896 |
| C | 4.0842718172  | 1.439184429   | -1.7353510097 |
| H | 4.6607155552  | 0.5188704648  | -1.7142438277 |
| C | 3.325464273   | -1.2376414953 | -0.2639580561 |
| C | 3.1142624363  | -1.8248033141 | -1.5209462137 |
| H | 2.3963231051  | -1.3874005329 | -2.2110464301 |
| C | 3.8193840604  | -2.9688139865 | -1.8797042921 |
| H | 3.6574152524  | -3.4146704417 | -2.8568860231 |
| C | 4.724299518   | -3.5440296131 | -0.986896182  |
| H | 5.2699200261  | -4.4401482515 | -1.2683006161 |
| C | 4.9246800596  | -2.9712407924 | 0.2662021464  |
| H | 5.6214136083  | -3.4190275088 | 0.9690301068  |
| C | 4.2288501893  | -1.8193821601 | 0.6303898058  |
| H | 4.3910062255  | -1.3840185116 | 1.6112193581  |
| C | -0.3387274838 | -1.4569023645 | 4.2446253542  |
| C | 0.4123511702  | -2.6364224709 | 4.3027431267  |
| C | 0.2583868055  | -3.4699239898 | 5.4166251852  |
| H | 0.8546598615  | -4.3754396389 | 5.4982474237  |
| C | -0.6536252442 | -3.1432812402 | 6.417512592   |
| H | -0.7672191791 | -3.7981515529 | 7.2766302681  |
| C | -1.4244985045 | -1.9867513853 | 6.3184376671  |
| H | -2.1385364784 | -1.7384780543 | 7.0983950035  |
| C | -1.2704171242 | -1.1319804774 | 5.2271299288  |
| H | -1.8623504288 | -0.2228365855 | 5.1638501052  |
| C | 2.9842801407  | -3.7608433581 | 3.6433572953  |
| C | 3.2170919183  | -5.1391769934 | 3.5939435502  |
| H | 2.5025583343  | -5.7939854518 | 3.1028381065  |

|   |               |               |               |
|---|---------------|---------------|---------------|
| C | 4.3661184812  | -5.6772715857 | 4.1709790036  |
| H | 4.5373619711  | -6.749417446  | 4.1272931601  |
| C | 5.2889329635  | -4.8474253806 | 4.802434173   |
| H | 6.1839345689  | -5.2699077109 | 5.2505354239  |
| C | 5.0650965395  | -3.4719313626 | 4.8532852135  |
| H | 5.7850398231  | -2.8192356435 | 5.3393022405  |
| C | 3.9245965915  | -2.9299088578 | 4.2699396915  |
| H | 3.7643459632  | -1.8536253689 | 4.2998017501  |
| C | 0.7023100097  | -4.2885990621 | 1.9324775022  |
| C | 1.0833763304  | -4.4218642463 | 0.5894508899  |
| H | 1.8287358773  | -3.7514212673 | 0.1677384991  |
| C | 0.5169860481  | -5.4105354143 | -0.2102771778 |
| H | 0.826351631   | -5.5064750451 | -1.2474322412 |
| C | -0.448068837  | -6.2669338694 | 0.3171392173  |
| H | -0.893835287  | -7.0359770572 | -0.3076613312 |
| C | -0.8420733593 | -6.1321858533 | 1.6468056011  |
| H | -1.5960308771 | -6.7954351584 | 2.0619803659  |
| C | -0.2703734618 | -5.1497208551 | 2.4527186713  |
| H | -0.5898647917 | -5.0549330672 | 3.4864913862  |

XYZ coordinates of the optimized structure of **5F**

103

|    |               |               |               |
|----|---------------|---------------|---------------|
| Pd | 0.0438880432  | -0.0095044997 | -0.0654745074 |
| P  | 2.0771583224  | 1.3047353735  | 0.1033400642  |
| Cl | 0.0533456641  | -0.2582004258 | -2.5325608105 |
| Bi | 0.012529522   | 0.0983440165  | 2.5782839715  |
| P  | -2.0358741224 | 1.1994788619  | 0.0275724887  |
| P  | 0.2062970335  | -2.3635377298 | 0.2666594952  |
| C  | 2.1264794653  | 0.762419405   | 2.8827500685  |
| C  | 2.8371337346  | 1.250483508   | 1.7854704318  |
| C  | 4.1174303054  | 1.7845271599  | 2.0003870443  |
| H  | 4.6716859265  | 2.2083915553  | 1.1668273209  |
| C  | 4.6869842488  | 1.7760921742  | 3.2680042009  |
| H  | 5.6835603691  | 2.1836625758  | 3.4133596154  |
| C  | 3.9766702788  | 1.2540643012  | 4.3472356418  |
| H  | 4.4188497933  | 1.2446868634  | 5.339856546   |
| C  | 2.6878238463  | 0.761711741   | 4.1606571808  |
| H  | 2.1077903907  | 0.39111107743 | 4.9978263342  |
| C  | 3.408853339   | 0.7740671152  | -1.0355397474 |
| C  | 3.2560560256  | 1.0512966617  | -2.4028508712 |
| H  | 2.3785341605  | 1.5859851839  | -2.7534790759 |
| C  | 4.2174434064  | 0.6386907993  | -3.3196032662 |
| H  | 4.0871664499  | 0.870328514   | -4.3731619711 |
| C  | 5.3384278701  | -0.0699663462 | -2.8896894416 |
| H  | 6.0909262275  | -0.388534394  | -3.6059114446 |
| C  | 5.4824028197  | -0.3752743596 | -1.539435481  |
| H  | 6.3435118269  | -0.9416029055 | -1.1953182177 |
| C  | 4.5219581372  | 0.0370563013  | -0.6176497573 |
| H  | 4.6462680215  | -0.2232927661 | 0.4287210097  |



|   |               |               |               |
|---|---------------|---------------|---------------|
| C | 2.0177913908  | 3.1364383645  | -0.1252394334 |
| C | 0.9925598193  | 3.8294664004  | 0.5312717011  |
| H | 0.2379825118  | 3.2807933837  | 1.089839176   |
| C | 0.9221133347  | 5.2175250774  | 0.4757954811  |
| H | 0.1204750505  | 5.7358835519  | 0.9948325268  |
| C | 1.8684548781  | 5.935511269   | -0.253244986  |
| H | 1.8098564686  | 7.0191001844  | -0.30647255   |
| C | 2.8882898514  | 5.2563837441  | -0.9142799894 |
| H | 3.6322167999  | 5.807891135   | -1.4830202392 |
| C | 2.9694131624  | 3.8659666579  | -0.8458361604 |
| H | 3.7776959705  | 3.3543365544  | -1.3593781275 |
| C | -1.5152601013 | 1.7275138437  | 2.7574782669  |
| C | -2.2334960177 | 2.1156698837  | 1.6222645725  |
| C | -3.1264609587 | 3.1911260466  | 1.7350940869  |
| H | -3.6934914826 | 3.5176962948  | 0.8690669663  |
| C | -3.2888385252 | 3.8589983866  | 2.9444065487  |
| H | -3.9774282453 | 4.6971307741  | 3.0064917546  |
| C | -2.5734413136 | 3.4529157729  | 4.0675892443  |
| H | -2.6975180907 | 3.9722509051  | 5.0140235624  |
| C | -1.6887500373 | 2.3807677598  | 3.9779636146  |
| H | -1.128431995  | 2.047603184   | 4.8438728977  |
| C | -2.3300882755 | 2.4639141075  | -1.2704054497 |
| C | -1.2264449347 | 2.974247506   | -1.960565706  |
| H | -0.2400301945 | 2.5733298568  | -1.7537692308 |
| C | -1.3913920204 | 3.96777873    | -2.9230092709 |
| H | -0.5236316131 | 4.3533082165  | -3.4512458973 |
| C | -2.663051446  | 4.4523254952  | -3.2160965553 |
| H | -2.7927997899 | 5.2230641888  | -3.9710493236 |
| C | -3.7726271704 | 3.9360165202  | -2.5485994461 |
| H | -4.7693628428 | 4.3012324857  | -2.7807579182 |
| C | -3.6093782491 | 2.9460277679  | -1.5840207028 |
| H | -4.4855208695 | 2.5390062348  | -1.0863699662 |
| C | -3.5784423655 | 0.2009833581  | -0.0343530895 |
| C | -4.0842472983 | -0.2155498489 | -1.2743944807 |
| H | -3.6034196103 | 0.1074975184  | -2.194112849  |
| C | -5.2055632878 | -1.0384068751 | -1.3395541262 |
| H | -5.5925310743 | -1.3403700057 | -2.3091896737 |
| C | -5.8281228909 | -1.4716032164 | -0.170136993  |
| H | -6.7025244059 | -2.1141826998 | -0.2224255863 |
| C | -5.324153942  | -1.0736526618 | 1.0658231214  |
| H | -5.8038351639 | -1.403567599  | 1.9833120986  |
| C | -4.2083939562 | -0.241614263  | 1.1352909407  |
| H | -3.8361423803 | 0.0689436341  | 2.1079530703  |
| C | -0.5546964434 | -2.0314567222 | 2.9591600217  |
| C | -0.4482622001 | -2.9255441287 | 1.8943994022  |
| C | -0.8287122854 | -4.2602335839 | 2.0967844921  |
| H | -0.7507154929 | -4.9735917292 | 1.2806860145  |
| C | -1.3138996146 | -4.6761681929 | 3.3323469395  |
| H | -1.6161306232 | -5.7105417222 | 3.4707181986  |

|   |               |               |               |
|---|---------------|---------------|---------------|
| C | -1.4103547141 | -3.7703358309 | 4.3861985987  |
| H | -1.7925963978 | -4.0930142259 | 5.3509535157  |
| C | -1.0206888059 | -2.4445106713 | 4.2064453743  |
| H | -1.0776012586 | -1.7309755357 | 5.0200831898  |
| C | -0.694165058  | -3.4447334332 | -0.9099164369 |
| C | -1.9787906577 | -3.0537936406 | -1.3000653673 |
| H | -2.3801418691 | -2.1057602552 | -0.9546859847 |
| C | -2.7386197339 | -3.8634730153 | -2.1376083636 |
| H | -3.7351343368 | -3.5445800763 | -2.4309385924 |
| C | -2.217674678  | -5.0680669711 | -2.6074743417 |
| H | -2.8072117928 | -5.6963909567 | -3.2696167708 |
| C | -0.9361773203 | -5.4605754451 | -2.2300416516 |
| H | -0.5222968147 | -6.3975556568 | -2.5929201905 |
| C | -0.1767947218 | -4.6559626937 | -1.3821081426 |
| H | 0.8202719079  | -4.9751875447 | -1.0936557989 |
| C | 1.9067685669  | -3.0487298498 | 0.2322907551  |
| C | 2.6250458828  | -2.9491920154 | -0.9675999881 |
| H | 2.170592787   | -2.465429282  | -1.8297474684 |
| C | 3.9137541086  | -3.4638531743 | -1.0578022929 |
| H | 4.4564234694  | -3.3877692459 | -1.9955484712 |
| C | 4.5128985114  | -4.0559680123 | 0.0536897364  |
| H | 5.5219000659  | -4.4529835723 | -0.0175320346 |
| C | 3.816220418   | -4.1306346425 | 1.2565705194  |
| H | 4.2785595363  | -4.5844062714 | 2.1291018473  |
| C | 2.5154614205  | -3.635564368  | 1.3466168099  |
| H | 1.9766649025  | -3.7157962283 | 2.286334557   |
| F | -0.0433465531 | 0.1801216112  | 4.719773222   |

XYZ coordinates of the optimized structure of **5F'**

103

|    |               |               |               |
|----|---------------|---------------|---------------|
| Pd | 0.0230701428  | 0.1530593438  | -0.0376750822 |
| P  | 2.318616836   | 0.5020643857  | 0.0449869411  |
| Cl | -0.1216088125 | 0.0301002231  | -2.4907301039 |
| Bi | 0.0965734042  | -0.0388716506 | 2.6148444467  |
| P  | -2.2606988383 | 0.4120808868  | 0.292721662   |
| P  | 1.5367597539  | -3.0639436012 | 1.648602787   |
| C  | 2.2475816558  | 0.5630334321  | 2.8834637534  |
| C  | 3.011070492   | 0.7470506384  | 1.7319840536  |
| C  | 4.3415387529  | 1.1746027012  | 1.8624896709  |
| H  | 4.9473754981  | 1.3407704699  | 0.9750466025  |
| C  | 4.8937036535  | 1.3911808153  | 3.1195574915  |
| H  | 5.925017971   | 1.7216199141  | 3.204989347   |
| C  | 4.1226459778  | 1.1876080842  | 4.261835217   |
| H  | 4.5505881662  | 1.3566250625  | 5.2463674187  |
| C  | 2.7964244896  | 0.7757842094  | 4.1474816465  |
| H  | 2.1785842843  | 0.622678822   | 5.0242344     |
| C  | 3.4304290824  | -0.6989159993 | -0.7677628321 |
| C  | 3.3073445567  | -0.8832458152 | -2.152657443  |
| H  | 2.5667477359  | -0.3158178647 | -2.709227127  |

|   |               |               |               |
|---|---------------|---------------|---------------|
| C | 4.1168299793  | -1.8027408124 | -2.8117796212 |
| H | 4.0152525447  | -1.9326928156 | -3.8856846275 |
| C | 5.0506328355  | -2.5535520701 | -2.0995355198 |
| H | 5.6848040512  | -3.2684062149 | -2.6165382852 |
| C | 5.1653114333  | -2.3863181273 | -0.7220469816 |
| H | 5.8887085475  | -2.9694808436 | -0.158653818  |
| C | 4.3564722123  | -1.4676367588 | -0.0548565047 |
| H | 4.4526868329  | -1.3537683751 | 1.0204662319  |
| C | 2.6915704742  | 2.108911499   | -0.7577611832 |
| C | 1.8120685001  | 3.1730187427  | -0.5182793086 |
| H | 0.9211333771  | 3.0096820559  | 0.0845963095  |
| C | 2.0682266199  | 4.4322357411  | -1.0505893289 |
| H | 1.3794811471  | 5.2498872145  | -0.8565745677 |
| C | 3.2000463428  | 4.640263978   | -1.8376979683 |
| H | 3.3963805863  | 5.6217278994  | -2.260232895  |
| C | 4.0754053484  | 3.5862528378  | -2.084283798  |
| H | 4.9579438837  | 3.7417429426  | -2.6987109719 |
| C | 3.8268564577  | 2.3254674002  | -1.5446363207 |
| H | 4.5164193508  | 1.511045589   | -1.7467036356 |
| C | -1.7026549571 | 1.2739545697  | 2.9098937329  |
| C | -2.5963922536 | 1.3542136913  | 1.8365839811  |
| C | -3.7493842138 | 2.1421999759  | 1.9625791323  |
| H | -4.4499279521 | 2.2193301387  | 1.1349618388  |
| C | -3.9933754831 | 2.844473225   | 3.1395785264  |
| H | -4.8829451209 | 3.4626844368  | 3.2220621177  |
| C | -3.099983262  | 2.7545465714  | 4.2040446427  |
| H | -3.2875282979 | 3.3073053246  | 5.120823977   |
| C | -1.9599005091 | 1.958329552   | 4.0958295016  |
| H | -1.2663750007 | 1.8642549511  | 4.924101449   |
| C | -3.0605723373 | 1.4144971519  | -1.0073847684 |
| C | -2.6081237652 | 2.7252603878  | -1.2091257659 |
| H | -1.8146498834 | 3.1298612046  | -0.5851499201 |
| C | -3.1686798357 | 3.5137047937  | -2.2067051821 |
| H | -2.8143696324 | 4.5302569775  | -2.3529566516 |
| C | -4.1770755959 | 2.9980618254  | -3.021723329  |
| H | -4.6113638974 | 3.6137954128  | -3.8043993849 |
| C | -4.6223644098 | 1.6935172557  | -2.8323682285 |
| H | -5.4048308091 | 1.285640764   | -3.4661830059 |
| C | -4.0673495314 | 0.9009446983  | -1.8280784074 |
| H | -4.4199955312 | -0.1166778846 | -1.6884223838 |
| C | -3.2457140546 | -1.1214640787 | 0.4034797813  |
| C | -2.7299995931 | -2.2746922175 | -0.1986673781 |
| H | -1.7635903915 | -2.2375390632 | -0.6955925682 |
| C | -3.4475470417 | -3.4673067714 | -0.1568280303 |
| H | -3.0371749835 | -4.3578391981 | -0.6246356169 |
| C | -4.6797124254 | -3.5165893847 | 0.4909473169  |
| H | -5.2371098049 | -4.4484519244 | 0.5289277511  |
| C | -5.1956805621 | -2.3718775535 | 1.0966810453  |
| H | -6.153996246  | -2.4093005925 | 1.6072783582  |

|   |               |               |               |
|---|---------------|---------------|---------------|
| C | -4.4830018231 | -1.1769684846 | 1.0551479236  |
| H | -4.8875466153 | -0.2925043423 | 1.53974994    |
| C | -0.6521927859 | -2.0874724996 | 3.0697685621  |
| C | -0.0424529315 | -3.2433132173 | 2.5756427186  |
| C | -0.6455577681 | -4.4834616739 | 2.8316608222  |
| H | -0.1860128762 | -5.392925629  | 2.4536261802  |
| C | -1.8297213359 | -4.5615360077 | 3.5551316314  |
| H | -2.2898700508 | -5.5290529798 | 3.7366663994  |
| C | -2.4224462933 | -3.4002808627 | 4.0501508461  |
| H | -3.3456106393 | -3.4576368044 | 4.6206498267  |
| C | -1.8309542048 | -2.1623249189 | 3.8147006221  |
| H | -2.2903858684 | -1.2608415457 | 4.2116510505  |
| C | 1.3294812027  | -4.2335981772 | 0.2465740661  |
| C | 0.9071974545  | -3.686621402  | -0.9724893773 |
| H | 0.7697572036  | -2.6108677206 | -1.0664005909 |
| C | 0.6686458817  | -4.5070569391 | -2.0731694953 |
| H | 0.3394510931  | -4.0659574127 | -3.0103068349 |
| C | 0.8658792969  | -5.8823918495 | -1.974095764  |
| H | 0.6869580337  | -6.5225716043 | -2.833781671  |
| C | 1.3038124723  | -6.4343998802 | -0.7714391935 |
| H | 1.4662586193  | -7.5060439573 | -0.690659849  |
| C | 1.5336527738  | -5.6171059335 | 0.3325073368  |
| H | 1.8844367115  | -6.0591100639 | 1.2615352592  |
| C | 2.7378910236  | -3.904266443  | 2.7564917179  |
| C | 3.9340363919  | -4.4147620646 | 2.2299764852  |
| H | 4.097101364   | -4.4128054738 | 1.155389131   |
| C | 4.9136087254  | -4.9381207921 | 3.06887636    |
| H | 5.8283503914  | -5.3396479876 | 2.6404482982  |
| C | 4.7238902951  | -4.9485011677 | 4.4493895401  |
| H | 5.4894009066  | -5.3562523158 | 5.1038317635  |
| C | 3.5463291625  | -4.4318404458 | 4.9838443052  |
| H | 3.3879460303  | -4.4340424207 | 6.059076135   |
| C | 2.5608792493  | -3.9131485478 | 4.1465321632  |
| H | 1.6473090731  | -3.5160831653 | 4.5809203791  |
| F | 0.1284669551  | 0.0851665508  | 4.7732807264  |

XYZ coordinates of the optimized structure of **5CN**

104

|    |               |               |               |
|----|---------------|---------------|---------------|
| Pd | 0.0627963765  | 0.0280328248  | -0.0933305116 |
| P  | 2.0831830372  | 1.3352898166  | 0.042647704   |
| Cl | 0.0625463206  | -0.2016328025 | -2.5556410524 |
| Bi | 0.0621788731  | 0.1507855049  | 2.555552835   |
| P  | -2.0532389642 | 1.1574505553  | 0.0369868152  |
| P  | 0.2241771938  | -2.3298500466 | 0.2757575236  |
| C  | 2.2592346579  | 0.6227300585  | 2.7810369559  |
| C  | 2.9394354052  | 1.1159418967  | 1.6650822442  |
| C  | 4.2771310457  | 1.5102250277  | 1.8191048049  |
| H  | 4.8136435897  | 1.9360724939  | 0.9755709693  |
| C  | 4.9312681959  | 1.3558246185  | 3.0357691336  |

|   |               |               |               |
|---|---------------|---------------|---------------|
| H | 5.9713598853  | 1.6548832367  | 3.1303797995  |
| C | 4.2503776801  | 0.8230015202  | 4.1267157136  |
| H | 4.7560919624  | 0.6907738054  | 5.0792001442  |
| C | 2.9076400577  | 0.472986305   | 4.0048344464  |
| H | 2.3727020111  | 0.0952723396  | 4.8702412752  |
| C | 3.329504103   | 0.8977988562  | -1.2244768068 |
| C | 3.1440709042  | 1.3884443425  | -2.5256537582 |
| H | 2.3068009437  | 2.0442292019  | -2.7451638584 |
| C | 4.0262669409  | 1.0439146765  | -3.5441105011 |
| H | 3.8717210504  | 1.4399880211  | -4.5439516293 |
| C | 5.0988150761  | 0.1921761888  | -3.2842375513 |
| H | 5.7897532723  | -0.0742890637 | -4.0793135061 |
| C | 5.2756484457  | -0.3193329328 | -2.0018667485 |
| H | 6.1041135612  | -0.9899558532 | -1.7901096355 |
| C | 4.3942611186  | 0.0249523227  | -0.9783450775 |
| H | 4.5428169306  | -0.3932296741 | 0.011955621   |
| C | 2.0413229232  | 3.1794944567  | -0.0445875047 |
| C | 0.9483824942  | 3.8394935048  | 0.5273111916  |
| H | 0.1230282852  | 3.2634036049  | 0.9357718167  |
| C | 0.9014657644  | 5.2301121105  | 0.5773622927  |
| H | 0.0437770969  | 5.7224337163  | 1.02755891    |
| C | 1.9439269708  | 5.9819047078  | 0.0415668847  |
| H | 1.9060692895  | 7.0673445312  | 0.0706815028  |
| C | 3.0351846068  | 5.3354504096  | -0.535516358  |
| H | 3.8528291716  | 5.9147504212  | -0.9560179004 |
| C | 3.0888889071  | 3.944175862   | -0.5737250324 |
| H | 3.9478807829  | 3.4573126919  | -1.0259369888 |
| C | -1.4198913678 | 1.8418091578  | 2.7169623836  |
| C | -2.202624005  | 2.1420684635  | 1.5968704449  |
| C | -3.1006365169 | 3.2156804634  | 1.6801135488  |
| H | -3.7212833006 | 3.4680779402  | 0.8258456195  |
| C | -3.1971401628 | 3.9787617075  | 2.8391723814  |
| H | -3.8900318852 | 4.8146624112  | 2.8767628023  |
| C | -2.4058419346 | 3.6715576434  | 3.9415164801  |
| H | -2.468559522  | 4.2680101341  | 4.8474465226  |
| C | -1.5232189261 | 2.5948492297  | 3.8841665931  |
| H | -0.9185613852 | 2.3516196713  | 4.7520748375  |
| C | -2.4185361138 | 2.3748668743  | -1.2874004702 |
| C | -1.3431325398 | 2.9448595351  | -1.9761423798 |
| H | -0.3344519023 | 2.611777567   | -1.7547148994 |
| C | -1.5627252517 | 3.9114757908  | -2.9545245062 |
| H | -0.7169503676 | 4.3439113657  | -3.4821426702 |
| C | -2.8605309136 | 4.3079516679  | -3.2663315889 |
| H | -3.0325258281 | 5.0562258884  | -4.0352661685 |
| C | -3.9402535519 | 3.7335011524  | -2.5979706591 |
| H | -4.9561283715 | 4.0320503911  | -2.8421072825 |
| C | -3.7226410237 | 2.7720519667  | -1.6149561189 |
| H | -4.5744789914 | 2.3234356084  | -1.111063152  |
| C | -3.5719031674 | 0.1250785289  | 0.0700106148  |

|   |               |               |               |
|---|---------------|---------------|---------------|
| C | -4.0760689702 | -0.3924005589 | -1.1323749716 |
| H | -3.6097115232 | -0.1239126813 | -2.0774095047 |
| C | -5.1772300763 | -1.2435852117 | -1.1281464263 |
| H | -5.5623304213 | -1.6268206699 | -2.0693342891 |
| C | -5.7829582419 | -1.6017732002 | 0.0751568564  |
| H | -6.6420642778 | -2.2667097798 | 0.0773624865  |
| C | -5.2829639017 | -1.1000172557 | 1.274160574   |
| H | -5.7507205083 | -1.3704144498 | 2.21691015    |
| C | -4.1858156649 | -0.24037732   | 1.2737844035  |
| H | -3.8164365429 | 0.1521490859  | 2.2174242509  |
| C | -0.7256210826 | -1.9294608142 | 2.8970731283  |
| C | -0.6126388393 | -2.8323345974 | 1.8383582557  |
| C | -1.1347499884 | -4.1231979975 | 1.9975202666  |
| H | -1.0460529751 | -4.8434269567 | 1.1888703254  |
| C | -1.7740883111 | -4.4875458157 | 3.1786459492  |
| H | -2.1864748094 | -5.4873893614 | 3.2810469916  |
| C | -1.8834593109 | -3.5736060598 | 4.2224655045  |
| H | -2.3887685622 | -3.8502650162 | 5.1437121425  |
| C | -1.3463765543 | -2.293937978  | 4.0882237547  |
| H | -1.41956758   | -1.5906695032 | 4.911848417   |
| C | -0.5414018187 | -3.4390692107 | -0.9663645818 |
| C | -1.7641597889 | -3.0494153371 | -1.5215218575 |
| H | -2.1903916672 | -2.0879310628 | -1.2541683381 |
| C | -2.4282665675 | -3.8803768893 | -2.4175855695 |
| H | -3.3794699726 | -3.5654975039 | -2.8383735898 |
| C | -1.8682227977 | -5.10324673   | -2.7837022663 |
| H | -2.3816050803 | -5.7482501003 | -3.491635611  |
| C | -0.6455160208 | -5.4936440316 | -2.2434935627 |
| H | -0.202540742  | -6.4452210824 | -2.5247311673 |
| C | 0.0156735416  | -4.668587117  | -1.3351720104 |
| H | 0.9660378399  | -4.9866930131 | -0.916819674  |
| C | 1.9099414917  | -3.0312946036 | 0.46107871    |
| C | 2.782748068   | -2.9273314294 | -0.6307945204 |
| H | 2.4537377737  | -2.4308420076 | -1.5413432312 |
| C | 4.0672145752  | -3.45589142   | -0.5554171257 |
| H | 4.7293354674  | -3.3784786892 | -1.4131396368 |
| C | 4.5076293835  | -4.0668124447 | 0.6183074678  |
| H | 5.513579268   | -4.4732127067 | 0.6771307386  |
| C | 3.6549673126  | -4.1498375249 | 1.715511561   |
| H | 3.9918649841  | -4.619565407  | 2.6356604251  |
| C | 2.3586952759  | -3.6415368234 | 1.6372675844  |
| H | 1.6982660437  | -3.728736322  | 2.4951578136  |
| C | 0.0564243801  | 0.2514190928  | 4.9772665843  |
| N | 0.0445184554  | 0.2812308046  | 6.1449364723  |

XYZ coordinates of the optimized structure of **5CN**<sup>†</sup>

104

|    |              |              |               |
|----|--------------|--------------|---------------|
| Pd | 0.0129563358 | 0.1330297674 | -0.0201830118 |
| P  | 2.3058949185 | 0.4851770901 | 0.0399868884  |

|    |               |               |               |
|----|---------------|---------------|---------------|
| Cl | -0.1487828216 | 0.0032203245  | -2.4679642608 |
| Bi | 0.1052616778  | -0.0655725265 | 2.6297517094  |
| P  | -2.2674556461 | 0.4062305536  | 0.3243558798  |
| P  | 1.5499420902  | -3.069999608  | 1.6354188712  |
| C  | 2.2652895979  | 0.5660160912  | 2.886962351   |
| C  | 3.007850067   | 0.7492812677  | 1.7211474801  |
| C  | 4.3335073605  | 1.1973318686  | 1.8277818242  |
| H  | 4.9229776875  | 1.3607210056  | 0.9289914437  |
| C  | 4.9026334195  | 1.4396301964  | 3.0725013146  |
| H  | 5.9298644917  | 1.7866610184  | 3.1375589515  |
| C  | 4.1511860429  | 1.2415714206  | 4.2274516289  |
| H  | 4.5869863439  | 1.4317146897  | 5.204429792   |
| C  | 2.8301814137  | 0.8068447308  | 4.1353831351  |
| H  | 2.2450219735  | 0.6611201278  | 5.038292359   |
| C  | 3.4197958063  | -0.7173349883 | -0.7672906392 |
| C  | 3.2878009368  | -0.9165972445 | -2.1492901161 |
| H  | 2.5373620738  | -0.362042712  | -2.7057292707 |
| C  | 4.1022336152  | -1.8336960554 | -2.8056686664 |
| H  | 3.9938450353  | -1.9752270522 | -3.8774104178 |
| C  | 5.0492217345  | -2.5676430143 | -2.093382527  |
| H  | 5.687060272   | -3.2807220524 | -2.6082626368 |
| C  | 5.1726323433  | -2.3858311794 | -0.7184967191 |
| H  | 5.9069795399  | -2.9554614744 | -0.155408451  |
| C  | 4.359556648   | -1.468916248  | -0.0540214606 |
| H  | 4.463640668   | -1.3432199573 | 1.0192734608  |
| C  | 2.6694389887  | 2.0864011807  | -0.7781579063 |
| C  | 1.7921898388  | 3.1522426869  | -0.5380720159 |
| H  | 0.9082794145  | 2.9942619832  | 0.0763664171  |
| C  | 2.0417547337  | 4.4068915616  | -1.08393632   |
| H  | 1.3548721155  | 5.2258894601  | -0.8891153486 |
| C  | 3.1645006256  | 4.6085829661  | -1.8855566782 |
| H  | 3.355585584   | 5.5864326807  | -2.3186904792 |
| C  | 4.037515725   | 3.5528645059  | -2.1328378463 |
| H  | 4.9130271761  | 3.7032987701  | -2.7584309731 |
| C  | 3.7957227065  | 2.2966709968  | -1.5796045033 |
| H  | 4.4836548867  | 1.4811025285  | -1.7824130652 |
| C  | -1.6838366742 | 1.2730688842  | 2.942297593   |
| C  | -2.5809144934 | 1.3542589088  | 1.8707562956  |
| C  | -3.7205363004 | 2.1613353227  | 1.9943864753  |
| H  | -4.4253956897 | 2.2369393413  | 1.1704091433  |
| C  | -3.9462513933 | 2.8867667196  | 3.1610519657  |
| H  | -4.8258766043 | 3.519409002   | 3.2394441747  |
| C  | -3.045052587  | 2.8033200564  | 4.2182365245  |
| H  | -3.2121199968 | 3.3769493385  | 5.1258574938  |
| C  | -1.9198061306 | 1.9853859156  | 4.1138898833  |
| H  | -1.2296337828 | 1.9059694316  | 4.9489161823  |
| C  | -3.0581038391 | 1.4214762674  | -0.971103872  |
| C  | -2.5966341175 | 2.7300627335  | -1.165830305  |
| H  | -1.804126563  | 3.1277418988  | -0.5363079239 |

|   |               |               |               |
|---|---------------|---------------|---------------|
| C | -3.1474145257 | 3.5254883068  | -2.1632847787 |
| H | -2.7864456676 | 4.5404765899  | -2.3038782703 |
| C | -4.1547258135 | 3.0187960789  | -2.9852002047 |
| H | -4.5813988308 | 3.6399498177  | -3.7677605989 |
| C | -4.6086879566 | 1.7162416906  | -2.8029008701 |
| H | -5.3902515109 | 1.3153051515  | -3.4421908937 |
| C | -4.0636288049 | 0.9166598473  | -1.7987721538 |
| H | -4.4229578835 | -0.0993499921 | -1.665015763  |
| C | -3.276538038  | -1.1107883391 | 0.4355605458  |
| C | -2.7794904757 | -2.2729677355 | -0.1648210258 |
| H | -1.8079762358 | -2.2549051564 | -0.6529613939 |
| C | -3.5238030324 | -3.4494804649 | -0.1337604195 |
| H | -3.1291773984 | -4.3475733313 | -0.6005346983 |
| C | -4.7629218091 | -3.4735660172 | 0.5019690536  |
| H | -5.3411142915 | -4.3929760181 | 0.5309475903  |
| C | -5.2595334537 | -2.3199790139 | 1.1071518394  |
| H | -6.2231866644 | -2.3380664174 | 1.6086009702  |
| C | -4.5207464307 | -1.1409030363 | 1.0757720138  |
| H | -4.9112221649 | -0.24910585   | 1.5583740772  |
| C | -0.6703131014 | -2.1267810447 | 3.0262920198  |
| C | -0.0473695789 | -3.2702555826 | 2.5238030302  |
| C | -0.6538822892 | -4.5158576648 | 2.7444471371  |
| H | -0.183250606  | -5.4174145173 | 2.3609648771  |
| C | -1.8532348392 | -4.6077902151 | 3.4403011291  |
| H | -2.3155997494 | -5.5787386196 | 3.5954509391  |
| C | -2.4580561203 | -3.4564311803 | 3.9439591729  |
| H | -3.3936519035 | -3.5244854955 | 4.4923613251  |
| C | -1.8628949682 | -2.2139624848 | 3.7452529053  |
| H | -2.3320093682 | -1.3222546762 | 4.1547288973  |
| C | 1.380182904   | -4.238203478  | 0.227832328   |
| C | 0.9393484185  | -3.6987606176 | -0.9881325903 |
| H | 0.7681875343  | -2.6274472611 | -1.077498107  |
| C | 0.7248599868  | -4.5214653623 | -2.0918513875 |
| H | 0.3809798593  | -4.08676804   | -3.0266877842 |
| C | 0.9644185087  | -5.8905866332 | -1.9989971251 |
| H | 0.8043329095  | -6.5321587463 | -2.861337097  |
| C | 1.419126568   | -6.4343334678 | -0.7989453757 |
| H | 1.6129101047  | -7.5010570985 | -0.7224845127 |
| C | 1.6247257621  | -5.6152879768 | 0.3086191132  |
| H | 1.9861395525  | -6.0507345714 | 1.2366239694  |
| C | 2.7355487013  | -3.8961100604 | 2.7700226348  |
| C | 3.9549560796  | -4.3800896672 | 2.2726438398  |
| H | 4.1475731078  | -4.3664769805 | 1.2030275922  |
| C | 4.9205935049  | -4.8920451558 | 3.1344152413  |
| H | 5.8539837606  | -5.2734249953 | 2.728456153   |
| C | 4.6934232582  | -4.9161990429 | 4.5090719148  |
| H | 5.4482278614  | -5.3146746225 | 5.1813841454  |
| C | 3.4926608775  | -4.4248094703 | 5.014861429   |
| H | 3.305270749   | -4.4371480822 | 6.0852889934  |



|   |              |               |             |
|---|--------------|---------------|-------------|
| C | 2.5207658166 | -3.918287297  | 4.154578682 |
| H | 1.5892916421 | -3.5402839206 | 4.567475273 |
| C | 0.1156853787 | -0.0759365811 | 5.093273006 |
| N | 0.0656846656 | -0.2064837639 | 6.254166535 |

XYZ coordinates of the optimized structure of [5]BMe<sub>4</sub>  
119

|    |               |               |               |
|----|---------------|---------------|---------------|
| Pd | 0.0103160496  | -0.021125122  | 0.0188424923  |
| P  | -2.2860699829 | 0.3357295331  | 0.3685253304  |
| Cl | -0.0407840491 | 0.0653968175  | -2.349721486  |
| Bi | 0.0848542886  | -0.0555784221 | 2.5858708546  |
| P  | 2.3452772672  | 0.2400963742  | 0.1458758845  |
| P  | 1.5259148108  | -2.9556041642 | 2.8822245951  |
| C  | -1.5277450815 | 1.4461131218  | 2.8606258689  |
| C  | -2.4527040242 | 1.4890920526  | 1.802557231   |
| C  | -3.5125994416 | 2.4022744281  | 1.8594998659  |
| H  | -4.2313842555 | 2.4542654486  | 1.0463541207  |
| C  | -3.6466733421 | 3.2538726729  | 2.9539716987  |
| H  | -4.4700433164 | 3.9613729526  | 2.9843982893  |
| C  | -2.7306118849 | 3.2022286407  | 4.0002500916  |
| H  | -2.8311908468 | 3.874192974   | 4.8477634878  |
| C  | -1.673092308  | 2.2931242545  | 3.9577263924  |
| H  | -0.9576317306 | 2.2675879104  | 4.77591052    |
| C  | -3.1804311738 | 1.145417383   | -0.991385126  |
| C  | -2.6732323874 | 2.3475552675  | -1.502678298  |
| H  | -1.7615119023 | 2.7747525937  | -1.0926961004 |
| C  | -3.331480733  | 2.9932781942  | -2.5419290751 |
| H  | -2.9354755821 | 3.9259129744  | -2.9330509043 |
| C  | -4.4886885346 | 2.4378409746  | -3.0889439257 |
| H  | -4.9977350686 | 2.9411028941  | -3.9059993116 |
| C  | -4.9870446339 | 1.2371432631  | -2.5925002261 |
| H  | -5.8853227573 | 0.7997435531  | -3.0185321382 |
| C  | -4.3366917457 | 0.5883862406  | -1.5440597135 |
| H  | -4.7324834836 | -0.3472381616 | -1.1603743498 |
| C  | -3.2325933255 | -1.1571619878 | 0.8061769739  |
| C  | -2.8054514534 | -2.3844603177 | 0.2841765153  |
| H  | -1.9205468609 | -2.4290422061 | -0.3470141416 |
| C  | -3.5112448573 | -3.5483888703 | 0.5762376786  |
| H  | -3.1710215946 | -4.4975666448 | 0.173432023   |
| C  | -4.6362997341 | -3.4939940558 | 1.3964636754  |
| H  | -5.1822540616 | -4.4038150485 | 1.6293899282  |
| C  | -5.0594202844 | -2.275544146  | 1.9247347349  |
| H  | -5.9335987314 | -2.2331340672 | 2.568062826   |
| C  | -4.3619253075 | -1.1070384217 | 1.6323299223  |
| H  | -4.6947313619 | -0.1611443969 | 2.0510635205  |
| C  | 2.0850417836  | 0.7944597442  | 2.9362617114  |
| C  | 2.9125614153  | 0.8245730348  | 1.8065143026  |
| C  | 4.2105917217  | 1.3382210322  | 1.9368878426  |
| H  | 4.8647272723  | 1.3914761707  | 1.0704239151  |

|   |               |               |               |
|---|---------------|---------------|---------------|
| C | 4.6696603866  | 1.7870462559  | 3.1714648519  |
| H | 5.6784138995  | 2.179690373   | 3.2576066321  |
| C | 3.8402798111  | 1.7377677405  | 4.2896177062  |
| H | 4.1982000516  | 2.0943186394  | 5.2511601671  |
| C | 2.5437824402  | 1.2393086531  | 4.175004521   |
| H | 1.9011322653  | 1.207869887   | 5.0507403437  |
| C | 2.9224412737  | 1.5630348823  | -0.9686534801 |
| C | 2.1852456937  | 2.7532916609  | -1.0116587976 |
| H | 1.2713342815  | 2.8485830381  | -0.4295075019 |
| C | 2.6136797021  | 3.8100656302  | -1.8063032384 |
| H | 2.037681075   | 4.730558378   | -1.8357216541 |
| C | 3.7730340054  | 3.6832890274  | -2.5716798404 |
| H | 4.1025396051  | 4.5073941141  | -3.1979849718 |
| C | 4.5043099674  | 2.4997002362  | -2.5365124931 |
| H | 5.4062544351  | 2.3962845198  | -3.1329365896 |
| C | 4.0842718172  | 1.439184429   | -1.7353510097 |
| H | 4.6607155552  | 0.5188704648  | -1.7142438277 |
| C | 3.325464273   | -1.2376414953 | -0.2639580561 |
| C | 3.1142624363  | -1.8248033141 | -1.5209462137 |
| H | 2.3963231051  | -1.3874005329 | -2.2110464301 |
| C | 3.8193840604  | -2.9688139865 | -1.8797042921 |
| H | 3.6574152524  | -3.4146704417 | -2.8568860231 |
| C | 4.724299518   | -3.5440296131 | -0.986896182  |
| H | 5.2699200261  | -4.4401482515 | -1.2683006161 |
| C | 4.9246800596  | -2.9712407924 | 0.2662021464  |
| H | 5.6214136083  | -3.4190275088 | 0.9690301068  |
| C | 4.2288501893  | -1.8193821601 | 0.6303898058  |
| H | 4.3910062255  | -1.3840185116 | 1.6112193581  |
| C | -0.3387275424 | -1.4569024056 | 4.2446253122  |
| C | 0.4123511702  | -2.6364224709 | 4.3027431267  |
| C | 0.2583868055  | -3.4699239898 | 5.4166251852  |
| H | 0.8546598615  | -4.3754396389 | 5.4982474237  |
| C | -0.6536252442 | -3.1432812402 | 6.417512592   |
| H | -0.7672191791 | -3.7981515529 | 7.2766302681  |
| C | -1.4244958476 | -1.9867495281 | 6.3184394968  |
| H | -2.1385364784 | -1.7384780543 | 7.0983950035  |
| C | -1.2704273563 | -1.131987031  | 5.2271314814  |
| H | -1.8623377774 | -0.2228272197 | 5.1638492604  |
| C | 2.9842801407  | -3.7608433581 | 3.6433572953  |
| C | 3.2170919183  | -5.1391769934 | 3.5939435502  |
| H | 2.5025583343  | -5.7939854518 | 3.1028381065  |
| C | 4.3661184812  | -5.6772715857 | 4.1709790036  |
| H | 4.5373619711  | -6.749417446  | 4.1272931601  |
| C | 5.2889329635  | -4.8474253806 | 4.802434173   |
| H | 6.1839345689  | -5.2699077109 | 5.2505354239  |
| C | 5.0650965395  | -3.4719313626 | 4.8532852135  |
| H | 5.7850398231  | -2.8192356435 | 5.3393022405  |
| C | 3.9245965915  | -2.9299088578 | 4.2699396915  |
| H | 3.7643459632  | -1.8536253689 | 4.2998017501  |

|   |               |               |               |
|---|---------------|---------------|---------------|
| C | 0.7023100097  | -4.2885990621 | 1.9324775022  |
| C | 1.0833763304  | -4.4218642463 | 0.5894508899  |
| H | 1.8287358773  | -3.7514212673 | 0.1677384991  |
| C | 0.5169860481  | -5.4105354143 | -0.2102771778 |
| H | 0.826351631   | -5.5064750451 | -1.2474322412 |
| C | -0.448068837  | -6.2669338694 | 0.3171392173  |
| H | -0.893835287  | -7.0359770572 | -0.3076613312 |
| C | -0.8420733593 | -6.1321858533 | 1.6468056011  |
| H | -1.5960308771 | -6.7954351584 | 2.0619803659  |
| C | -0.2703734618 | -5.1497208551 | 2.4527186713  |
| H | -0.5898647917 | -5.0549330672 | 3.4864913862  |
| B | 0.561654941   | 2.5869997472  | 8.1127834635  |
| C | 1.0578822691  | 3.6222512848  | 6.9266348729  |
| C | -1.0875614724 | 2.5617534137  | 8.1728836607  |
| C | 1.123729646   | 1.067673541   | 7.7925489999  |
| C | 1.1571575909  | 3.0932411811  | 9.5651491398  |
| H | -1.4771241805 | 1.8850798141  | 8.9538862456  |
| H | -1.5503652593 | 2.2265773908  | 7.2265568191  |
| H | -1.5226491867 | 3.553713977   | 8.3876568958  |
| H | 2.1577617307  | 3.6787737081  | 6.8390129494  |
| H | 0.7142422949  | 4.6586969406  | 7.0905731786  |
| H | 0.6927124711  | 3.342425991   | 5.9215726691  |
| H | 0.8570448175  | 2.4370325519  | 10.4009445306 |
| H | 0.8167464447  | 4.1075459606  | 9.8382250039  |
| H | 2.2605892105  | 3.1268009734  | 9.5867749839  |
| H | 0.8571067033  | 0.3350459418  | 8.5741971231  |
| H | 2.2239157221  | 1.0265826047  | 7.7023576591  |
| H | 0.7216058479  | 0.6505429299  | 6.8512886567  |

XYZ coordinates of the optimized structure of **6**

102

|    |               |               |               |
|----|---------------|---------------|---------------|
| Pt | -0.0205728298 | -0.0673186245 | 0.0840168976  |
| P  | -2.291676476  | 0.3031334853  | 0.3957020909  |
| Cl | -0.0899038695 | -0.089057798  | -2.2983578643 |
| Sb | 0.075869535   | 0.0308184515  | 2.5847149752  |
| P  | 2.288249308   | 0.2337237577  | 0.1325424589  |
| P  | 1.4870656515  | -2.8497786552 | 2.8259370002  |
| C  | -1.4758344766 | 1.4914413815  | 2.8322310922  |
| C  | -2.4302482753 | 1.5019938025  | 1.7955870151  |
| C  | -3.4871117682 | 2.4161204306  | 1.8459150756  |
| H  | -4.2239996863 | 2.4406175012  | 1.0478111811  |
| C  | -3.593287708  | 3.3097645157  | 2.9097602589  |
| H  | -4.414395946  | 4.0200877918  | 2.9336644206  |
| C  | -2.6487997481 | 3.2979965216  | 3.9311769567  |
| H  | -2.7255856017 | 4.0024085115  | 4.7542858068  |
| C  | -1.5937566565 | 2.386564012   | 3.8957939156  |
| H  | -0.859840287  | 2.3958475754  | 4.6973207934  |
| C  | -3.171956799  | 1.0987018343  | -0.9836825481 |
| C  | -2.6232989303 | 2.2610513416  | -1.5416262645 |

|   |               |               |               |
|---|---------------|---------------|---------------|
| H | -1.687755651  | 2.6609307461  | -1.1588918721 |
| C | -3.2696454752 | 2.8999894358  | -2.5924787702 |
| H | -2.8407783615 | 3.8014312929  | -3.0203919681 |
| C | -4.4578227211 | 2.3770929561  | -3.1039222922 |
| H | -4.9579178931 | 2.874628056   | -3.9299978411 |
| C | -4.9988558765 | 1.2161675403  | -2.5601947109 |
| H | -5.9213328333 | 0.8036641014  | -2.9584466419 |
| C | -4.3600688462 | 0.5751568285  | -1.4997912304 |
| H | -4.7899485444 | -0.3287346682 | -1.0786717942 |
| C | -3.2831910452 | -1.1447601339 | 0.8816780785  |
| C | -2.8815247999 | -2.4041773348 | 0.4212464198  |
| H | -1.9787458696 | -2.4989342325 | -0.1776385523 |
| C | -3.6336057465 | -3.5325794882 | 0.7369652204  |
| H | -3.3139017126 | -4.5068197305 | 0.3800575462  |
| C | -4.7795289586 | -3.4100757471 | 1.5197899889  |
| H | -5.3621381793 | -4.2920732523 | 1.7704127828  |
| C | -5.1767723188 | -2.1589745089 | 1.9886987249  |
| H | -6.0668400149 | -2.0633946779 | 2.6038954229  |
| C | -4.4333475812 | -1.0261434269 | 1.6714994033  |
| H | -4.7472556036 | -0.0544473199 | 2.0430703424  |
| C | 2.0213931593  | 0.8244152937  | 2.9098739082  |
| C | 2.8584422173  | 0.8399620187  | 1.7829355843  |
| C | 4.1573141205  | 1.3455847786  | 1.9126461051  |
| H | 4.8153030467  | 1.3857867473  | 1.0485139159  |
| C | 4.6155648041  | 1.8050210147  | 3.1441672645  |
| H | 5.6261649619  | 2.1929760579  | 3.2295804142  |
| C | 3.782788932   | 1.770867572   | 4.260011959   |
| H | 4.1404374801  | 2.1323058078  | 5.2196538933  |
| C | 2.483975353   | 1.2801908714  | 4.1449911134  |
| H | 1.8408599668  | 1.2578184483  | 5.0206333937  |
| C | 2.8200467509  | 1.560359548   | -1.0009407334 |
| C | 2.0136677686  | 2.7000973599  | -1.106801714  |
| H | 1.0720633577  | 2.7456501905  | -0.5649897896 |
| C | 2.4082959805  | 3.7611526183  | -1.9136027021 |
| H | 1.7764949626  | 4.6409652422  | -1.9947126496 |
| C | 3.605304357   | 3.689074627   | -2.6255826845 |
| H | 3.9092256832  | 4.5157900431  | -3.261376155  |
| C | 4.4071752819  | 2.5555279482  | -2.5269241713 |
| H | 5.3380406037  | 2.4942717723  | -3.0833958411 |
| C | 4.0197226318  | 1.4911852583  | -1.7150083093 |
| H | 4.6496135948  | 0.6088035614  | -1.6472954576 |
| C | 3.3164524169  | -1.2134897494 | -0.278214756  |
| C | 3.140740177   | -1.7919264376 | -1.5445453834 |
| H | 2.4300851346  | -1.3603803894 | -2.2453223282 |
| C | 3.8684998732  | -2.9229614058 | -1.8987186151 |
| H | 3.7307974759  | -3.3634647313 | -2.8819962045 |
| C | 4.7644290673  | -3.4924762951 | -0.9935418383 |
| H | 5.3277975149  | -4.3787160315 | -1.2712903685 |
| C | 4.933224284   | -2.9262836751 | 0.2669493624  |

|   |               |               |               |
|---|---------------|---------------|---------------|
| H | 5.6232612323  | -3.3690769315 | 0.9795111739  |
| C | 4.2127390017  | -1.7882758724 | 0.6270670518  |
| H | 4.349257542   | -1.3601690682 | 1.614905043   |
| C | -0.3622328058 | -1.3353843899 | 4.1738533453  |
| C | 0.3746228882  | -2.5268435239 | 4.2447392132  |
| C | 0.208724341   | -3.357736907  | 5.3568582032  |
| H | 0.7970983014  | -4.2679168188 | 5.4433144201  |
| C | -0.7050447124 | -3.0216708401 | 6.3534355312  |
| H | -0.8288952017 | -3.6742596962 | 7.2129238725  |
| C | -1.4639384544 | -1.8580519862 | 6.2486483498  |
| H | -2.1797038621 | -1.6020857916 | 7.0243718811  |
| C | -1.2949213773 | -1.0066009842 | 5.1580041207  |
| H | -1.8772685764 | -0.0916188548 | 5.0933520511  |
| C | 2.9287612681  | -3.688957157  | 3.5829556159  |
| C | 3.1526651686  | -5.0667544094 | 3.4954750095  |
| H | 2.4389130121  | -5.7018251294 | 2.9781963466  |
| C | 4.291785082   | -5.6301215269 | 4.0682843561  |
| H | 4.4556426509  | -6.7017967479 | 3.9947054666  |
| C | 5.2139458622  | -4.8262419274 | 4.7331614217  |
| H | 6.1010892891  | -5.2683269093 | 5.1779595894  |
| C | 4.9994528844  | -3.4511037418 | 4.821543813   |
| H | 5.718970303   | -2.8181431406 | 5.3336184509  |
| C | 3.8690081834  | -2.8838699734 | 4.2427794451  |
| H | 3.7171843591  | -1.8075716147 | 4.3018073613  |
| C | 0.6383219132  | -4.1555204498 | 1.8605855108  |
| C | 0.9493368947  | -4.2255394344 | 0.4954053416  |
| H | 1.6567978119  | -3.5217027645 | 0.0637306489  |
| C | 0.3611390286  | -5.1938699106 | -0.3138983486 |
| H | 0.613230436   | -5.2380872165 | -1.3697974811 |
| C | -0.5521251128 | -6.0956389506 | 0.2288009677  |
| H | -1.0137946551 | -6.84980037   | -0.402607302  |
| C | -0.8755215413 | -6.025452719  | 1.5826675884  |
| H | -1.5897963218 | -6.7241928567 | 2.0096782697  |
| C | -0.2850786843 | -5.0609409042 | 2.3960136416  |
| H | -0.5524851764 | -5.0135771331 | 3.4476593663  |

XYZ coordinates of the optimized structure of **6F**

103

|    |               |               |               |
|----|---------------|---------------|---------------|
| Pt | 0.0303073992  | 0.0410623654  | -0.0174642711 |
| P  | 2.0372053939  | 1.2660764623  | 0.0696528823  |
| Cl | 0.0435458133  | -0.2128856033 | -2.4979041062 |
| Sb | 0.0006251445  | 0.1904507539  | 2.5739045881  |
| P  | -2.0236941597 | 1.1667960989  | -0.0106054403 |
| P  | 0.2154706871  | -2.2755307322 | 0.2901463171  |
| C  | 2.097119911   | 0.6810740284  | 2.8270921832  |
| C  | 2.8474617147  | 1.0840895073  | 1.7157191613  |
| C  | 4.1893790831  | 1.4471380932  | 1.8913369061  |
| H  | 4.7718440915  | 1.7957254754  | 1.0428833936  |
| C  | 4.7899953147  | 1.3599759184  | 3.1419301377  |

|   |               |               |               |
|---|---------------|---------------|---------------|
| H | 5.8359203367  | 1.6304133573  | 3.2580124461  |
| C | 4.0466432555  | 0.9339205351  | 4.2397807442  |
| H | 4.5102912973  | 0.8627616473  | 5.2199635254  |
| C | 2.7013422815  | 0.6117716133  | 4.0867545958  |
| H | 2.1096701606  | 0.3102783923  | 4.9426230893  |
| C | 3.3025932405  | 0.7962940907  | -1.1645464284 |
| C | 3.1851633916  | 1.2987407484  | -2.4690561263 |
| H | 2.3860310335  | 1.9918247359  | -2.7151386182 |
| C | 4.0889710908  | 0.9204803113  | -3.4562585862 |
| H | 3.9881529028  | 1.3253955255  | -4.4594780415 |
| C | 5.1157398432  | 0.0254055993  | -3.1601774499 |
| H | 5.8242071999  | -0.2667498839 | -3.9304993165 |
| C | 5.2219063185  | -0.4995500146 | -1.8756739816 |
| H | 6.0089592663  | -1.2099034317 | -1.6381246078 |
| C | 4.3171866907  | -0.1245352402 | -0.8844730628 |
| H | 4.4056634761  | -0.5583055498 | 0.1070237346  |
| C | 2.0246514603  | 3.1131566008  | -0.0325906685 |
| C | 0.943285154   | 3.7960349927  | 0.5337297519  |
| H | 0.1024560103  | 3.2348031896  | 0.9321061432  |
| C | 0.9280637321  | 5.1869630954  | 0.5893090374  |
| H | 0.0785298891  | 5.6972830845  | 1.0350056679  |
| C | 1.9913719587  | 5.9172386702  | 0.0642904006  |
| H | 1.977754394   | 7.0032019521  | 0.0969641293  |
| C | 3.0724397517  | 5.2479566471  | -0.5050837384 |
| H | 3.907086335   | 5.8096012198  | -0.9161610928 |
| C | 3.0949738151  | 3.8557430787  | -0.5467618999 |
| H | 3.9490029434  | 3.3515955437  | -0.9890262783 |
| C | -1.498483832  | 1.7517968449  | 2.7098611599  |
| C | -2.2526821032 | 2.0875842961  | 1.5761235244  |
| C | -3.1941823234 | 3.1205481393  | 1.6687323869  |
| H | -3.7857042936 | 3.395927792   | 0.8015848318  |
| C | -3.3730156833 | 3.8182676408  | 2.8586515596  |
| H | -4.098912888  | 4.6253636473  | 2.9054928885  |
| C | -2.6214239303 | 3.480789998   | 3.9801537531  |
| H | -2.7531130067 | 4.0238457373  | 4.9120735949  |
| C | -1.6939329452 | 2.4452544432  | 3.9083933021  |
| H | -1.112970282  | 2.1687351425  | 4.7797318678  |
| C | -2.3114830245 | 2.428477223   | -1.316720767  |
| C | -1.205026574  | 2.9704768928  | -1.9771166223 |
| H | -0.2149788114 | 2.5933264071  | -1.745707388  |
| C | -1.3696627461 | 3.9668218789  | -2.9365281929 |
| H | -0.4984791029 | 4.3757106752  | -3.4410061085 |
| C | -2.6445022682 | 4.4255046946  | -3.2561648052 |
| H | -2.77410601   | 5.1986948433  | -4.0086280715 |
| C | -3.7564440191 | 3.8806784207  | -2.6165061178 |
| H | -4.7557252357 | 4.2258643258  | -2.8675119019 |
| C | -3.5929111425 | 2.8869380891  | -1.6557214796 |
| H | -4.4720113519 | 2.4587787236  | -1.1820022258 |
| C | -3.5552044833 | 0.1520546333  | -0.0972174572 |

|   |               |               |               |
|---|---------------|---------------|---------------|
| C | -4.0701388067 | -0.2385860963 | -1.3416407329 |
| H | -3.6091678081 | 0.1199042563  | -2.2583053516 |
| C | -5.1756335784 | -1.082149824  | -1.415306071  |
| H | -5.5694521806 | -1.3652252872 | -2.3879087613 |
| C | -5.774071583  | -1.5592068352 | -0.2509304252 |
| H | -6.6361323656 | -2.2177298683 | -0.3098991054 |
| C | -5.2612784115 | -1.1861151672 | 0.9893018238  |
| H | -5.7217083581 | -1.5515881197 | 1.9031720489  |
| C | -4.1610860173 | -0.3351533367 | 1.067365788   |
| H | -3.7789906908 | -0.047283756  | 2.0432677656  |
| C | -0.5985763882 | -1.8512407735 | 2.9511813413  |
| C | -0.4832504681 | -2.7862255609 | 1.9162227495  |
| C | -0.8818808194 | -4.1095731697 | 2.1412761209  |
| H | -0.7932355158 | -4.8449744321 | 1.3466973959  |
| C | -1.4078068765 | -4.4893921285 | 3.3719729489  |
| H | -1.7277784132 | -5.5160885493 | 3.5271832653  |
| C | -1.5230563533 | -3.5546787788 | 4.3974333435  |
| H | -1.9369894388 | -3.8461116071 | 5.3589906689  |
| C | -1.108498001  | -2.2411557646 | 4.1927915724  |
| H | -1.1790878929 | -1.5123719713 | 4.9914624024  |
| C | -0.6394185328 | -3.3928734561 | -0.8872828701 |
| C | -1.859474701  | -2.9669916533 | -1.4192013245 |
| H | -2.2241654498 | -1.9728147949 | -1.1829700332 |
| C | -2.597178341  | -3.8023499943 | -2.2522246571 |
| H | -3.5446134084 | -3.4553787957 | -2.6556002204 |
| C | -2.1166416622 | -5.0697940924 | -2.5745162048 |
| H | -2.6876250498 | -5.71939197   | -3.2324668772 |
| C | -0.8986040391 | -5.5003010774 | -2.0537890841 |
| H | -0.5170314941 | -6.4875657668 | -2.2999654412 |
| C | -0.1631912464 | -4.6691402845 | -1.2113438992 |
| H | 0.7836902284  | -5.0192687141 | -0.8111143881 |
| C | 1.9185671587  | -2.9642428069 | 0.3430140496  |
| C | 2.6309497312  | -3.104448947  | -0.8558743988 |
| H | 2.1664383581  | -2.8293998782 | -1.7995489288 |
| C | 3.9296414175  | -3.6026894625 | -0.8484872775 |
| H | 4.4637851173  | -3.7181906589 | -1.7874236015 |
| C | 4.5472473973  | -3.9378978704 | 0.3555979308  |
| H | 5.5631707475  | -4.32342835   | 0.3594391876  |
| C | 3.856559216   | -3.7738350425 | 1.5534077329  |
| H | 4.3306468714  | -4.0286076738 | 2.4974857432  |
| C | 2.5465923197  | -3.2969875513 | 1.5486384001  |
| H | 2.0138965831  | -3.1916783081 | 2.4896528356  |
| F | -0.0319028189 | 0.3192505521  | 4.6270816867  |

XYZ coordinates of the optimized structure of **6F'**

103

|    |               |              |              |
|----|---------------|--------------|--------------|
| Pt | -0.0016826962 | 0.1509511432 | 0.0324732765 |
| P  | 2.2723879653  | 0.4862980976 | 0.0370930226 |
| Cl | -0.1587867439 | 0.1584790367 | -2.423663381 |

|    |               |               |               |
|----|---------------|---------------|---------------|
| Sb | 0.0863626803  | -0.0762487925 | 2.6158588314  |
| P  | -2.2639887883 | 0.4073329195  | 0.3213945523  |
| P  | 1.5917961976  | -3.0504792324 | 1.6333548595  |
| C  | 2.1588287287  | 0.5418029876  | 2.8678754613  |
| C  | 2.9412248635  | 0.7500448764  | 1.7258900404  |
| C  | 4.2594255103  | 1.205114838   | 1.8628848645  |
| H  | 4.8651337224  | 1.3867905743  | 0.9785219889  |
| C  | 4.8023369961  | 1.4321512586  | 3.1222634167  |
| H  | 5.8255203948  | 1.7853973229  | 3.2141591693  |
| C  | 4.0277099866  | 1.2084432181  | 4.2572036944  |
| H  | 4.444133089   | 1.3839607645  | 5.2454752715  |
| C  | 2.7124530282  | 0.7678516418  | 4.1317280544  |
| H  | 2.1015889241  | 0.5989338152  | 5.009627831   |
| C  | 3.3872432561  | -0.7272585793 | -0.7578655351 |
| C  | 3.2461791692  | -0.9490019261 | -2.1351647027 |
| H  | 2.4880798378  | -0.4076984536 | -2.6944912955 |
| C  | 4.0658124139  | -1.8661435147 | -2.7850914321 |
| H  | 3.9481468612  | -2.0274801409 | -3.8530528331 |
| C  | 5.0313751745  | -2.5736657784 | -2.0711504857 |
| H  | 5.6743244407  | -3.2858088858 | -2.5810249543 |
| C  | 5.1677489388  | -2.3656722321 | -0.7011956379 |
| H  | 5.9181171826  | -2.9131996232 | -0.1371921132 |
| C  | 4.3468596878  | -1.4508947498 | -0.0431837013 |
| H  | 4.4589241621  | -1.3055255515 | 1.0267772045  |
| C  | 2.6646195885  | 2.0719184679  | -0.799586177  |
| C  | 1.7784939814  | 3.1418943679  | -0.6229485011 |
| H  | 0.8684017874  | 2.9914301686  | -0.0466641601 |
| C  | 2.0521154733  | 4.3833799447  | -1.1870497759 |
| H  | 1.3551227486  | 5.2048343821  | -1.0461499156 |
| C  | 3.2108290239  | 4.568185606   | -1.9397249735 |
| H  | 3.4212034814  | 5.5358145318  | -2.3868751975 |
| C  | 4.0947128511  | 3.5082025281  | -2.1221533241 |
| H  | 4.9976722222  | 3.6451061214  | -2.7108061003 |
| C  | 3.8265424881  | 2.2644773404  | -1.5532577839 |
| H  | 4.5213565001  | 1.4441605937  | -1.7081027927 |
| C  | -1.6330812343 | 1.2115280517  | 2.933591796   |
| C  | -2.5595059052 | 1.3238844219  | 1.885080277   |
| C  | -3.697907273  | 2.1233907523  | 2.0441884493  |
| H  | -4.4139867406 | 2.2201136011  | 1.2321110969  |
| C  | -3.9062351521 | 2.8182885915  | 3.2324814426  |
| H  | -4.7849055464 | 3.4478145582  | 3.3417900846  |
| C  | -2.9864742847 | 2.7080492742  | 4.2716193914  |
| H  | -3.1429695117 | 3.2548056694  | 5.1976815204  |
| C  | -1.8612964985 | 1.8976989359  | 4.1275253244  |
| H  | -1.1532967072 | 1.7917258221  | 4.9416218432  |
| C  | -3.0717480371 | 1.4424978778  | -0.9497073175 |
| C  | -2.587989052  | 2.7415725239  | -1.1534403376 |
| H  | -1.7567966939 | 3.111131215   | -0.5578796015 |
| C  | -3.1604275187 | 3.5581954783  | -2.1208047419 |



|   |               |               |               |
|---|---------------|---------------|---------------|
| H | -2.7795691767 | 4.5644996123  | -2.2709449562 |
| C | -4.2142805025 | 3.0832673811  | -2.9023839437 |
| H | -4.6582888401 | 3.7211641154  | -3.6615736705 |
| C | -4.6916066977 | 1.7905840492  | -2.7111618827 |
| H | -5.5087660098 | 1.4137760885  | -3.3199637415 |
| C | -4.1237388833 | 0.9697599317  | -1.7370869679 |
| H | -4.5029345537 | -0.0377652094 | -1.594760808  |
| C | -3.265611482  | -1.1171195007 | 0.4093264013  |
| C | -2.7654391664 | -2.2678748125 | -0.2099935623 |
| H | -1.7938910065 | -2.2379540413 | -0.6970485117 |
| C | -3.5054371795 | -3.4472754749 | -0.1972980236 |
| H | -3.107633993  | -4.3363683119 | -0.678471875  |
| C | -4.7450947054 | -3.4854149169 | 0.4368877029  |
| H | -5.3202914614 | -4.4071028942 | 0.4511820428  |
| C | -5.246314718  | -2.3426635085 | 1.0584892974  |
| H | -6.2108121648 | -2.3714143694 | 1.5578593812  |
| C | -4.5106599021 | -1.1612242291 | 1.0467831322  |
| H | -4.904341317  | -0.278147895  | 1.5427904933  |
| C | -0.6468576975 | -2.0768965776 | 2.9759893914  |
| C | -0.0204869553 | -3.2330718559 | 2.4965862098  |
| C | -0.6243953599 | -4.4787956414 | 2.7172500201  |
| H | -0.1447593244 | -5.3807939167 | 2.3457506006  |
| C | -1.8318777087 | -4.5727208188 | 3.3985072639  |
| H | -2.2927665993 | -5.5444530285 | 3.5542354389  |
| C | -2.4449738397 | -3.4187974397 | 3.8848976974  |
| H | -3.3868595975 | -3.4851574667 | 4.4228956334  |
| C | -1.8513747324 | -2.1770819398 | 3.6815796848  |
| H | -2.331494744  | -1.2843724047 | 4.0736511951  |
| C | 1.4290160682  | -4.2270527462 | 0.2300995853  |
| C | 0.9700016301  | -3.6961081326 | -0.983056866  |
| H | 0.7787703881  | -2.6276750999 | -1.0667947476 |
| C | 0.763627948   | -4.5215793584 | -2.085775133  |
| H | 0.4061586528  | -4.0935183274 | -3.0186024862 |
| C | 1.0295239449  | -5.8860976033 | -1.9957469897 |
| H | 0.8764715676  | -6.5300295361 | -2.8576784107 |
| C | 1.5011328003  | -6.4217495632 | -0.7987119663 |
| H | 1.7145036141  | -7.4849247207 | -0.7238144025 |
| C | 1.6982270413  | -5.5994705128 | 0.308237793   |
| H | 2.0718061394  | -6.0288763568 | 1.2342088187  |
| C | 2.753845222   | -3.8857703434 | 2.7864154176  |
| C | 3.9881499967  | -4.3546742135 | 2.3107228564  |
| H | 4.2039575865  | -4.3255211523 | 1.245754565   |
| C | 4.9390093063  | -4.8702185098 | 3.1864801302  |
| H | 5.8839956759  | -5.2392851216 | 2.796126816   |
| C | 4.6828332482  | -4.912802366  | 4.555717514   |
| H | 5.4263115499  | -5.3133736281 | 5.2393807553  |
| C | 3.4675640133  | -4.4367026101 | 5.0408659198  |
| H | 3.2574974319  | -4.4634074883 | 6.1069218249  |
| C | 2.5102793889  | -3.9272890807 | 4.1657606884  |

|   |              |               |              |
|---|--------------|---------------|--------------|
| H | 1.56688967   | -3.5615836441 | 4.5620362324 |
| F | 0.1238804599 | -0.0576006695 | 4.6969124486 |

XYZ coordinates of the optimized structure of **6CN**

104

|    |               |               |               |
|----|---------------|---------------|---------------|
| Pt | 0.0695799871  | 0.0614119724  | -0.0379109262 |
| P  | 2.0503815929  | 1.3153586733  | 0.0304449952  |
| Cl | 0.0772264635  | -0.1709691772 | -2.5172283322 |
| Sb | 0.0675457374  | 0.192341833   | 2.5611061588  |
| P  | -2.019551467  | 1.1217794388  | 0.0261112455  |
| P  | 0.2326887206  | -2.25542481   | 0.2804130375  |
| C  | 2.2084893936  | 0.581243545   | 2.7581083407  |
| C  | 2.908735659   | 1.0618158079  | 1.6430143142  |
| C  | 4.2592741419  | 1.4065800431  | 1.7833043871  |
| H  | 4.8013720158  | 1.8210609175  | 0.9380675796  |
| C  | 4.9242611559  | 1.2112757853  | 2.9883462364  |
| H  | 5.9763694974  | 1.468495261   | 3.0728354732  |
| C  | 4.2366555004  | 0.6869790684  | 4.0782582714  |
| H  | 4.7485125795  | 0.5179455689  | 5.0215034342  |
| C  | 2.8802661541  | 0.3935036576  | 3.9676999475  |
| H  | 2.3485829928  | 0.0223995385  | 4.8372434347  |
| C  | 3.2841456931  | 0.9032991664  | -1.2572988914 |
| C  | 3.117174972   | 1.4536081907  | -2.536409891  |
| H  | 2.306122771   | 2.1501970344  | -2.7271990559 |
| C  | 3.9869119443  | 1.1198916172  | -3.5693283167 |
| H  | 3.8466638587  | 1.5612163783  | -4.552208613  |
| C  | 5.0290820995  | 0.2219931696  | -3.3452466241 |
| H  | 5.7100878658  | -0.0363324314 | -4.1515184935 |
| C  | 5.1884874112  | -0.3461899418 | -2.0846587763 |
| H  | 5.993810054   | -1.0523494988 | -1.9010148686 |
| C  | 4.3188458717  | -0.0140954866 | -1.0477013293 |
| H  | 4.4525143049  | -0.4763537795 | -0.075041269  |
| C  | 2.0228023412  | 3.1634467448  | -0.0232597689 |
| C  | 0.9166843178  | 3.830250217   | 0.5116631945  |
| H  | 0.0660369844  | 3.2571662169  | 0.867993761   |
| C  | 0.8910524244  | 5.2204291068  | 0.5898864539  |
| H  | 0.0216660675  | 5.7183575808  | 1.0105919458  |
| C  | 1.9698481143  | 5.9646722266  | 0.120174811   |
| H  | 1.9491098596  | 7.0498029949  | 0.1712559597  |
| C  | 3.0761806576  | 5.3110648733  | -0.4192838232 |
| H  | 3.9221133628  | 5.884325324   | -0.7890774182 |
| C  | 3.1074739722  | 3.9205969243  | -0.485416911  |
| H  | 3.9779908447  | 3.4288088546  | -0.9094151086 |
| C  | -1.3718079529 | 1.8224143565  | 2.6996755766  |
| C  | -2.1852556757 | 2.0969875462  | 1.5893577744  |
| C  | -3.113479803  | 3.1421368491  | 1.6712765761  |
| H  | -3.7553327872 | 3.3638962316  | 0.8245743735  |
| C  | -3.2112390032 | 3.9241121232  | 2.8177831931  |
| H  | -3.9269766601 | 4.7406145203  | 2.8539866894  |

|   |               |               |               |
|---|---------------|---------------|---------------|
| C | -2.3866992156 | 3.6611151236  | 3.9062648426  |
| H | -2.4441017286 | 4.2744232078  | 4.8011306375  |
| C | -1.4803460861 | 2.6054424676  | 3.8501077353  |
| H | -0.855235373  | 2.3994126837  | 4.7124673233  |
| C | -2.4003088463 | 2.3413267326  | -1.2943932953 |
| C | -1.3342941752 | 2.9355040486  | -1.976827368  |
| H | -0.321150884  | 2.617458811   | -1.7549688212 |
| C | -1.5678522776 | 3.9096508992  | -2.9444699682 |
| H | -0.7282136366 | 4.3605007939  | -3.4663294165 |
| C | -2.8709302299 | 4.2923713389  | -3.2508598919 |
| H | -3.0539076945 | 5.0473077275  | -4.0106973303 |
| C | -3.9415859519 | 3.696491453   | -2.5870203538 |
| H | -4.9617899576 | 3.9847052733  | -2.8253436412 |
| C | -3.7096784603 | 2.7265019303  | -1.6158460436 |
| H | -4.5558702236 | 2.2627407533  | -1.1165276071 |
| C | -3.5233140938 | 0.064991588   | 0.0529974879  |
| C | -4.0759839705 | -0.4005168178 | -1.1488780874 |
| H | -3.6642185044 | -0.0728936113 | -2.1002332156 |
| C | -5.1566673345 | -1.2781294543 | -1.1364598296 |
| H | -5.579882505  | -1.6202262657 | -2.077131922  |
| C | -5.6927030483 | -1.7148437683 | 0.0733275126  |
| H | -6.535257381  | -2.4006143147 | 0.0816953113  |
| C | -5.1431468472 | -1.2661277295 | 1.2718451427  |
| H | -5.5548334488 | -1.5994804797 | 2.2205679371  |
| C | -4.0678755511 | -0.3802952419 | 1.2634937455  |
| H | -3.6578238245 | -0.0333713901 | 2.2082406212  |
| C | -0.733152462  | -1.8039821675 | 2.8831104307  |
| C | -0.6179668801 | -2.732664986  | 1.8408622805  |
| C | -1.1544524896 | -4.0149017051 | 2.003483379   |
| H | -1.0581934851 | -4.7454140081 | 1.2052491083  |
| C | -1.8269815948 | -4.3576850222 | 3.1727709012  |
| H | -2.2537725482 | -5.3512040446 | 3.2780065994  |
| C | -1.9533769355 | -3.4263019819 | 4.1982716819  |
| H | -2.4868145974 | -3.6822670092 | 5.1095039232  |
| C | -1.394747283  | -2.1573808943 | 4.0595151472  |
| H | -1.4829264519 | -1.4465003709 | 4.8745774225  |
| C | -0.5235116193 | -3.3747182398 | -0.9595230246 |
| C | -1.7329206928 | -2.9825328158 | -1.5406716099 |
| H | -2.1500737056 | -2.0114103892 | -1.2966188024 |
| C | -2.3949312912 | -3.8238128026 | -2.4287332666 |
| H | -3.3358930356 | -3.5055782616 | -2.8695166623 |
| C | -1.8467771256 | -5.0618560072 | -2.7591763676 |
| H | -2.3584847619 | -5.715757044  | -3.4601798231 |
| C | -0.638358691  | -5.4569414729 | -2.1908854975 |
| H | -0.2049940343 | -6.4210003737 | -2.4430434642 |
| C | 0.0207952844  | -4.6205995317 | -1.2916528362 |
| H | 0.9593381232  | -4.9437835461 | -0.8514704451 |
| C | 1.9130774842  | -2.9677057893 | 0.4876807287  |
| C | 2.779006444   | -2.9433190601 | -0.6142915769 |

|   |              |               |               |
|---|--------------|---------------|---------------|
| H | 2.4496550756 | -2.5023102442 | -1.5525479273 |
| C | 4.0575239498 | -3.481811855  | -0.5153204652 |
| H | 4.7132848691 | -3.467974684  | -1.3814982774 |
| C | 4.5001159682 | -4.0234908805 | 0.6913705635  |
| H | 5.5016615755 | -4.4377057399 | 0.7683227169  |
| C | 3.6546736312 | -4.0280876285 | 1.7968089583  |
| H | 3.9926577315 | -4.4441036567 | 2.7420729555  |
| C | 2.3634876988 | -3.5110326645 | 1.695303577   |
| H | 1.708062608  | -3.5386253363 | 2.5610130556  |
| C | 0.0726212842 | 0.3012417576  | 4.8998206453  |
| N | 0.064905373  | 0.3361331791  | 6.0665550938  |

XYZ coordinates of the optimized structure of **6CN'**

104

|    |               |               |               |
|----|---------------|---------------|---------------|
| Pt | -0.0364438854 | 0.1044336373  | 0.007506543   |
| P  | 2.2371464856  | 0.4290847067  | -0.0125743204 |
| Cl | -0.2219529108 | 0.0993811186  | -2.4455169912 |
| Sb | 0.0865017722  | -0.1568677453 | 2.5836809974  |
| P  | -2.2871563199 | 0.429214959   | 0.3331539084  |
| P  | 1.6337000777  | -3.0831154119 | 1.631673021   |
| C  | 2.1544659816  | 0.5130901936  | 2.8251469863  |
| C  | 2.9160944627  | 0.7195027617  | 1.668209333   |
| C  | 4.2235084072  | 1.2098556977  | 1.780310451   |
| H  | 4.8130254851  | 1.3870107199  | 0.8841527802  |
| C  | 4.7759114315  | 1.4812136774  | 3.0269371063  |
| H  | 5.7906510318  | 1.8621035819  | 3.0981589704  |
| C  | 4.0186031147  | 1.2691084406  | 4.1744644399  |
| H  | 4.4364255686  | 1.4830758411  | 5.1542758586  |
| C  | 2.7148603678  | 0.7888334778  | 4.072175695   |
| H  | 2.13406762    | 0.6307173068  | 4.975025882   |
| C  | 3.3546448739  | -0.7815713144 | -0.8057181128 |
| C  | 3.183445166   | -1.0356737591 | -2.173898754  |
| H  | 2.4000660836  | -0.522063795  | -2.7247295421 |
| C  | 4.0060979817  | -1.9492694685 | -2.8250167346 |
| H  | 3.8656459002  | -2.1359305064 | -3.8860408669 |
| C  | 5.0026816987  | -2.6222016276 | -2.1204771104 |
| H  | 5.646945655   | -3.3326587217 | -2.6309597113 |
| C  | 5.1685696302  | -2.3824470503 | -0.7589076432 |
| H  | 5.943673192   | -2.9032048751 | -0.2030139358 |
| C  | 4.3465666513  | -1.4695436746 | -0.0999653897 |
| H  | 4.4824678365  | -1.298427132  | 0.9634838342  |
| C  | 2.6088117483  | 2.0140879726  | -0.8598398119 |
| C  | 1.7505890976  | 3.0951035304  | -0.6210640894 |
| H  | 0.8800782007  | 2.9545341306  | 0.01589791    |
| C  | 2.0046445218  | 4.3362464505  | -1.194124616  |
| H  | 1.3305045421  | 5.1665994454  | -1.0030728068 |
| C  | 3.1157051552  | 4.5099832243  | -2.0183785215 |
| H  | 3.3108558373  | 5.4775270589  | -2.4724596166 |
| C  | 3.9719992698  | 3.4398448625  | -2.2609984003 |

|   |               |               |               |
|---|---------------|---------------|---------------|
| H | 4.8386146136  | 3.5686368502  | -2.9035884849 |
| C | 3.7239717611  | 2.1958944741  | -1.6826267081 |
| H | 4.3982646668  | 1.3685409941  | -1.8829977077 |
| C | -1.5965161625 | 1.1672633869  | 2.9601758129  |
| C | -2.5287667014 | 1.323360969   | 1.9212801158  |
| C | -3.631323897  | 2.1665091527  | 2.1009343242  |
| H | -4.3539791624 | 2.2939686989  | 1.2990666421  |
| C | -3.7970378831 | 2.86423058    | 3.2946683032  |
| H | -4.6487211794 | 3.5271983893  | 3.417913103   |
| C | -2.8675991381 | 2.7158593434  | 4.3191532675  |
| H | -2.9850989669 | 3.2673468144  | 5.2478702601  |
| C | -1.7785678255 | 1.8607463335  | 4.1555051689  |
| H | -1.0691406516 | 1.7349268009  | 4.9680417863  |
| C | -3.0769104863 | 1.5219841264  | -0.9012522603 |
| C | -2.4275497845 | 2.7160830743  | -1.2396740718 |
| H | -1.4644437086 | 2.9535321258  | -0.7954706365 |
| C | -3.000751992  | 3.5897168488  | -2.1557111284 |
| H | -2.4886831157 | 4.5125438841  | -2.4133860469 |
| C | -4.2216153535 | 3.2745421727  | -2.7529794556 |
| H | -4.6654459325 | 3.954980364   | -3.4743772261 |
| C | -4.8653766787 | 2.0844615449  | -2.4291485629 |
| H | -5.8132018625 | 1.8308355002  | -2.8956724678 |
| C | -4.2972512843 | 1.2085096119  | -1.5044496756 |
| H | -4.8076183924 | 0.282199854   | -1.2579373723 |
| C | -3.3457315389 | -1.0558231206 | 0.4056890381  |
| C | -2.9496610115 | -2.1725913752 | -0.3394214056 |
| H | -2.0229087314 | -2.1388138622 | -0.9076093624 |
| C | -3.7367960333 | -3.320466251  | -0.3484072032 |
| H | -3.4217953512 | -4.1844650395 | -0.9266688199 |
| C | -4.9191497459 | -3.3617339858 | 0.3879224755  |
| H | -5.5305303356 | -4.2598914401 | 0.3838338397  |
| C | -5.314740073  | -2.2539886439 | 1.1351147011  |
| H | -6.233462381  | -2.2855595723 | 1.7142319528  |
| C | -4.5315652532 | -1.1029659464 | 1.1463960312  |
| H | -4.842111082  | -0.2467702871 | 1.7391826685  |
| C | -0.6827228774 | -2.166883795  | 2.8633091637  |
| C | -0.017684233  | -3.3062243487 | 2.3999629416  |
| C | -0.6164665791 | -4.5622888776 | 2.5703952609  |
| H | -0.1063338263 | -5.4524145834 | 2.2107945588  |
| C | -1.8556710868 | -4.6781879246 | 3.1882226336  |
| H | -2.3131342142 | -5.6566096007 | 3.3070618383  |
| C | -2.5052101695 | -3.5385550917 | 3.6618476958  |
| H | -3.4726010327 | -3.6232505436 | 4.149291008   |
| C | -1.9172006705 | -2.287170743  | 3.508727083   |
| H | -2.4267994083 | -1.4077387944 | 3.8955901533  |
| C | 1.5905917586  | -4.3021218862 | 0.2583409942  |
| C | 1.0957420914  | -3.8401903123 | -0.9687897051 |
| H | 0.8069632388  | -2.7959388768 | -1.0745613104 |
| C | 0.9745488805  | -4.7040819943 | -2.0539163454 |

|   |              |               |               |
|---|--------------|---------------|---------------|
| H | 0.5879589222 | -4.3306910342 | -2.9984979155 |
| C | 1.3614338578 | -6.03705861   | -1.9316622589 |
| H | 1.2748984158 | -6.7102476271 | -2.7803389187 |
| C | 1.8654406518 | -6.5030604033 | -0.7191479205 |
| H | 2.1695187338 | -7.5416875591 | -0.6181336746 |
| C | 1.9773324809 | -5.6431181045 | 0.3712764663  |
| H | 2.3726814223 | -6.018457953  | 1.311397854   |
| C | 2.7598734613 | -3.8296781041 | 2.876146809   |
| C | 4.0505185582 | -4.226257548  | 2.4931025416  |
| H | 4.3380189224 | -4.1955442772 | 1.4450955421  |
| C | 4.9668194058 | -4.6741382539 | 3.4399231608  |
| H | 5.9573295917 | -4.9887249254 | 3.1215547531  |
| C | 4.6182567808 | -4.7176068756 | 4.7886035146  |
| H | 5.3349437369 | -5.0646303886 | 5.5278590953  |
| C | 3.3462458303 | -4.3103147141 | 5.1820112598  |
| H | 3.0648082305 | -4.3362877602 | 6.2314145124  |
| C | 2.4230991759 | -3.8699359478 | 4.2356338707  |
| H | 1.4359105108 | -3.5537075164 | 4.561563498   |
| C | 0.1302522035 | -0.3363282598 | 4.9629063609  |
| N | 0.0895274066 | -0.5651259315 | 6.10831499    |

XYZ coordinates of the optimized structure of [6]BMe<sub>4</sub>  
119

|    |               |               |               |
|----|---------------|---------------|---------------|
| Pt | -0.0205728298 | -0.0673186245 | 0.0840168976  |
| P  | -2.291676476  | 0.3031334853  | 0.3957020909  |
| Cl | -0.0899038695 | -0.089057798  | -2.2983578643 |
| Sb | 0.075869535   | 0.0308184515  | 2.5847149752  |
| P  | 2.288249308   | 0.2337237577  | 0.1325424589  |
| P  | 1.4870656515  | -2.8497786552 | 2.8259370002  |
| C  | -1.4758332473 | 1.4914429018  | 2.8322299489  |
| C  | -2.4302482753 | 1.5019938025  | 1.7955870151  |
| C  | -3.4871117682 | 2.4161204306  | 1.8459150756  |
| H  | -4.2239996863 | 2.4406175012  | 1.0478111811  |
| C  | -3.593287708  | 3.3097645157  | 2.9097602589  |
| H  | -4.414395946  | 4.0200877918  | 2.9336644206  |
| C  | -2.6488009626 | 3.297995072   | 3.9311780855  |
| H  | -2.7255856017 | 4.0024085115  | 4.7542858068  |
| C  | -1.5937409522 | 2.3865479899  | 3.8957797215  |
| H  | -0.859851255  | 2.3958674632  | 4.6973399468  |
| C  | -3.171956799  | 1.0987018343  | -0.9836825481 |
| C  | -2.6232989303 | 2.2610513416  | -1.5416262645 |
| H  | -1.687755651  | 2.6609307461  | -1.1588918721 |
| C  | -3.2696454752 | 2.8999894358  | -2.5924787702 |
| H  | -2.8407783615 | 3.8014312929  | -3.0203919681 |
| C  | -4.4578227211 | 2.3770929561  | -3.1039222922 |
| H  | -4.9579178931 | 2.874628056   | -3.9299978411 |
| C  | -4.9988558765 | 1.2161675403  | -2.5601947109 |
| H  | -5.9213328333 | 0.8036641014  | -2.9584466419 |
| C  | -4.3600688462 | 0.5751568285  | -1.4997912304 |

|   |               |               |               |
|---|---------------|---------------|---------------|
| H | -4.7899485444 | -0.3287346682 | -1.0786717942 |
| C | -3.2831910452 | -1.1447601339 | 0.8816780785  |
| C | -2.8815247999 | -2.4041773348 | 0.4212464198  |
| H | -1.9787458696 | -2.4989342325 | -0.1776385523 |
| C | -3.6336057465 | -3.5325794882 | 0.7369652204  |
| H | -3.3139017126 | -4.5068197305 | 0.3800575462  |
| C | -4.7795289586 | -3.4100757471 | 1.5197899889  |
| H | -5.3621381793 | -4.2920732523 | 1.7704127828  |
| C | -5.1767723188 | -2.1589745089 | 1.9886987249  |
| H | -6.0668400149 | -2.0633946779 | 2.6038954229  |
| C | -4.4333475812 | -1.0261434269 | 1.6714994033  |
| H | -4.7472556036 | -0.0544473199 | 2.0430703424  |
| C | 2.0213932131  | 0.8244151424  | 2.9098739439  |
| C | 2.8584422173  | 0.8399620187  | 1.7829355843  |
| C | 4.1573141205  | 1.3455847786  | 1.9126461051  |
| H | 4.8153030467  | 1.3857867473  | 1.0485139159  |
| C | 4.6155648041  | 1.8050210147  | 3.1441672645  |
| H | 5.6261649619  | 2.1929760579  | 3.2295804142  |
| C | 3.7827893284  | 1.7708664611  | 4.2600122218  |
| H | 4.1404374801  | 2.1323058078  | 5.2196538933  |
| C | 2.4839718968  | 1.2801884105  | 4.1449885121  |
| H | 1.8408681323  | 1.257819838   | 5.0206289781  |
| C | 2.8200467509  | 1.560359548   | -1.0009407334 |
| C | 2.0136677686  | 2.7000973599  | -1.106801714  |
| H | 1.0720633577  | 2.7456501905  | -0.5649897896 |
| C | 2.4082959805  | 3.7611526183  | -1.9136027021 |
| H | 1.7764949626  | 4.6409652422  | -1.9947126496 |
| C | 3.605304357   | 3.689074627   | -2.6255826845 |
| H | 3.9092256832  | 4.5157900431  | -3.261376155  |
| C | 4.4071752819  | 2.5555279482  | -2.5269241713 |
| H | 5.3380406037  | 2.4942717723  | -3.0833958411 |
| C | 4.0197226318  | 1.4911852583  | -1.7150083093 |
| H | 4.6496135948  | 0.6088035614  | -1.6472954576 |
| C | 3.3164524169  | -1.2134897494 | -0.278214756  |
| C | 3.140740177   | -1.7919264376 | -1.5445453834 |
| H | 2.4300851346  | -1.3603803894 | -2.2453223282 |
| C | 3.8684998732  | -2.9229614058 | -1.8987186151 |
| H | 3.7307974759  | -3.3634647313 | -2.8819962045 |
| C | 4.7644290673  | -3.4924762951 | -0.9935418383 |
| H | 5.3277975149  | -4.3787160315 | -1.2712903685 |
| C | 4.933224284   | -2.9262836751 | 0.2669493624  |
| H | 5.6232612323  | -3.3690769315 | 0.9795111739  |
| C | 4.2127390017  | -1.7882758724 | 0.6270670518  |
| H | 4.349257542   | -1.3601690682 | 1.614905043   |
| C | -0.3622309257 | -1.3353830979 | 4.1738546954  |
| C | 0.3746228882  | -2.5268435239 | 4.2447392132  |
| C | 0.208724341   | -3.357736907  | 5.3568582032  |
| H | 0.7970983014  | -4.2679168188 | 5.4433144201  |
| C | -0.7050447124 | -3.0216708401 | 6.3534355312  |

|   |               |               |               |
|---|---------------|---------------|---------------|
| H | -0.8288952017 | -3.6742596962 | 7.2129238725  |
| C | -1.4639385918 | -1.8580520803 | 6.248648255   |
| H | -2.1797038621 | -1.6020857916 | 7.0243718811  |
| C | -1.2949152341 | -1.0065976918 | 5.1579953821  |
| H | -1.877286373  | -0.0916249483 | 5.0933613079  |
| C | 2.9287612681  | -3.688957157  | 3.5829556159  |
| C | 3.1526651686  | -5.0667544094 | 3.4954750095  |
| H | 2.4389130121  | -5.7018251294 | 2.9781963466  |
| C | 4.291785082   | -5.6301215269 | 4.0682843561  |
| H | 4.4556426509  | -6.7017967479 | 3.9947054666  |
| C | 5.2139458622  | -4.8262419274 | 4.7331614217  |
| H | 6.1010892891  | -5.2683269093 | 5.1779595894  |
| C | 4.9994528844  | -3.4511037418 | 4.821543813   |
| H | 5.718970303   | -2.8181431406 | 5.3336184509  |
| C | 3.8690081834  | -2.8838699734 | 4.2427794451  |
| H | 3.7171843591  | -1.8075716147 | 4.3018073613  |
| C | 0.6383219132  | -4.1555204498 | 1.8605855108  |
| C | 0.9493368947  | -4.2255394344 | 0.4954053416  |
| H | 1.6567978119  | -3.5217027645 | 0.0637306489  |
| C | 0.3611390286  | -5.1938699106 | -0.3138983486 |
| H | 0.613230436   | -5.2380872165 | -1.3697974811 |
| C | -0.5521251128 | -6.0956389506 | 0.2288009677  |
| H | -1.0137946551 | -6.84980037   | -0.402607302  |
| C | -0.8755215413 | -6.025452719  | 1.5826675884  |
| H | -1.5897963218 | -6.7241928567 | 2.0096782697  |
| C | -0.2850786843 | -5.0609409042 | 2.3960136416  |
| H | -0.5524851764 | -5.0135771331 | 3.4476593663  |
| B | 0.3019141192  | 2.6880598107  | 8.1056981804  |
| C | 0.9362963459  | 3.7107553976  | 6.9748954996  |
| C | -1.3364947255 | 2.596621542   | 7.9214828055  |
| C | 0.958679103   | 1.1852136816  | 7.9149058373  |
| C | 0.6471823076  | 3.2568384191  | 9.6162660582  |
| H | -1.8147057929 | 1.9499178955  | 8.6780741369  |
| H | -1.6396918904 | 2.1844236881  | 6.9421278845  |
| H | -1.8348047628 | 3.5787985864  | 8.004295316   |
| H | 2.033202429   | 3.8118202496  | 7.0581726365  |
| H | 0.5321930893  | 4.7360261111  | 7.0441088623  |
| H | 0.7469665409  | 3.3851876391  | 5.9355485386  |
| H | 0.2560781625  | 2.6039306609  | 10.4164075905 |
| H | 0.2176367632  | 4.2564624942  | 9.8057183109  |
| H | 1.7307856173  | 3.3528469932  | 9.8061804571  |
| H | 0.6023077331  | 0.4596972634  | 8.6671006091  |
| H | 2.0608996671  | 1.1822680091  | 7.9883493377  |
| H | 0.7146963747  | 0.7364365694  | 6.9346250146  |

XYZ coordinates of the optimized structure of **7**

102

|    |               |               |              |
|----|---------------|---------------|--------------|
| Pt | -0.0060906875 | -0.2139838656 | 0.187203274  |
| P  | -2.2733940686 | 0.1798434498  | 0.4956853016 |



|    |               |               |               |
|----|---------------|---------------|---------------|
| Cl | -0.1331155147 | -0.5277430821 | -2.159070601  |
| As | 0.104036332   | 0.1369625262  | 2.493158879   |
| P  | 2.2915772398  | 0.1489153386  | 0.1611944608  |
| P  | 1.5452204506  | -2.7760578467 | 2.6211416293  |
| C  | -1.2357805188 | 1.5321302378  | 2.7248030549  |
| C  | -2.2972760864 | 1.481214767   | 1.8011293881  |
| C  | -3.3184549878 | 2.4304767661  | 1.8818539982  |
| H  | -4.1359939449 | 2.4135442335  | 1.166233747   |
| C  | -3.279175136  | 3.4196357839  | 2.8632252052  |
| H  | -4.0727069576 | 4.1592353398  | 2.9117324162  |
| C  | -2.2220855915 | 3.4705862651  | 3.7668598232  |
| H  | -2.1850615174 | 4.2517214402  | 4.5201663709  |
| C  | -1.2008214216 | 2.5235336588  | 3.7030992284  |
| H  | -0.3761714005 | 2.5761284512  | 4.4078297287  |
| C  | -3.1678249922 | 0.9065607587  | -0.9107492747 |
| C  | -2.5976265787 | 2.0042145318  | -1.5691379044 |
| H  | -1.6354554175 | 2.3949438475  | -1.2482585739 |
| C  | -3.2567478745 | 2.5886565979  | -2.6434884439 |
| H  | -2.8110769748 | 3.4395072971  | -3.1504475993 |
| C  | -4.4794200161 | 2.0751700893  | -3.0771836119 |
| H  | -4.9895039775 | 2.5297762587  | -3.9216579867 |
| C  | -5.0422717303 | 0.9778207339  | -2.4329518233 |
| H  | -5.9915440995 | 0.572191369   | -2.7706376591 |
| C  | -4.3904369221 | 0.3913591687  | -1.3493255298 |
| H  | -4.8362252725 | -0.4637484802 | -0.850152939  |
| C  | -3.2877048362 | -1.1986096606 | 1.1091609676  |
| C  | -2.9442469952 | -2.4973404796 | 0.7160163326  |
| H  | -2.0625572364 | -2.6647814405 | 0.1015564112  |
| C  | -3.7294691569 | -3.5741032604 | 1.1195040132  |
| H  | -3.4577133627 | -4.5790461123 | 0.8118787868  |
| C  | -4.8462944394 | -3.3613976988 | 1.9243564878  |
| H  | -5.4539197974 | -4.2038434453 | 2.2424437056  |
| C  | -5.18206761   | -2.0706008014 | 2.3295028471  |
| H  | -6.0484768024 | -1.9045706776 | 2.9631677804  |
| C  | -4.4078092535 | -0.9884480686 | 1.9228577384  |
| H  | -4.6745097989 | 0.0148744748  | 2.2436034667  |
| C  | 1.8890042152  | 0.7827252392  | 2.8815288976  |
| C  | 2.8034654886  | 0.7654889752  | 1.8186053646  |
| C  | 4.1000444233  | 1.2425576682  | 2.0320725333  |
| H  | 4.8170314302  | 1.2568664558  | 1.2153438768  |
| C  | 4.4815980569  | 1.7000227151  | 3.2906527644  |
| H  | 5.4922108734  | 2.0656786926  | 3.4450913893  |
| C  | 3.5752385834  | 1.6843326755  | 4.3484642379  |
| H  | 3.8768048244  | 2.0342693777  | 5.3311107156  |
| C  | 2.2762020631  | 1.2239157063  | 4.1471589691  |
| H  | 1.5782754179  | 1.2012525604  | 4.9797882238  |
| C  | 2.7270093558  | 1.5317208751  | -0.9490265037 |
| C  | 1.8445480307  | 2.616119506   | -1.0308808441 |
| H  | 0.9050712865  | 2.5882670561  | -0.4839319968 |

|   |               |               |               |
|---|---------------|---------------|---------------|
| C | 2.1636621564  | 3.7194355541  | -1.8142613213 |
| H | 1.4721642121  | 4.5548416093  | -1.875986736  |
| C | 3.3624895489  | 3.7468475106  | -2.525565853  |
| H | 3.6080771593  | 4.6061064136  | -3.1431264132 |
| C | 4.2423388145  | 2.6707564597  | -2.4481414317 |
| H | 5.1760551536  | 2.6873341457  | -3.0029442378 |
| C | 3.9303351009  | 1.5645219465  | -1.660397949  |
| H | 4.6215555748  | 0.728326235   | -1.610438775  |
| C | 3.4129724389  | -1.2119938435 | -0.2891758241 |
| C | 3.30834956    | -1.7319292771 | -1.5881686129 |
| H | 2.5965046399  | -1.3057227066 | -2.2902214862 |
| C | 4.1074534489  | -2.8028596771 | -1.9748087918 |
| H | 4.0222033804  | -3.1989450927 | -2.9825481123 |
| C | 5.0086580197  | -3.3669040227 | -1.0723330619 |
| H | 5.6298171801  | -4.2045994999 | -1.3762209104 |
| C | 5.1099748597  | -2.8568104951 | 0.2193112666  |
| H | 5.8060862538  | -3.2948362782 | 0.9288464311  |
| C | 4.3142325686  | -1.7829693968 | 0.6141420082  |
| H | 4.3954801481  | -1.4030291229 | 1.6272547648  |
| C | -0.3291848722 | -1.1524075913 | 3.895066086   |
| C | 0.3731642504  | -2.367892681  | 3.9781277783  |
| C | 0.1494643397  | -3.1927212236 | 5.08498179    |
| H | 0.7159185576  | -4.1149394605 | 5.1869898069  |
| C | -0.7844563173 | -2.8454568209 | 6.0583593754  |
| H | -0.9480266265 | -3.502136951  | 6.9080363252  |
| C | -1.5094201219 | -1.6640581494 | 5.9384328496  |
| H | -2.2440327454 | -1.3920729599 | 6.6905038303  |
| C | -1.279636939  | -0.8120530051 | 4.8604950742  |
| H | -1.832085116  | 0.1196992803  | 4.7903960854  |
| C | 2.8765882733  | -3.6702562091 | 3.5143028529  |
| C | 3.0868338691  | -5.0496891711 | 3.4201235283  |
| H | 2.413709859   | -5.6624921194 | 2.827084092   |
| C | 4.1585580501  | -5.645365067  | 4.0843727339  |
| H | 4.310255682   | -6.7183944603 | 4.0033307472  |
| C | 5.0274952902  | -4.8730240485 | 4.8499481559  |
| H | 5.8611904954  | -5.3400830953 | 5.3668408954  |
| C | 4.8279994582  | -3.4959701857 | 4.945898319   |
| H | 5.5061541053  | -2.8860081193 | 5.5365826048  |
| C | 3.7669566139  | -2.8972607127 | 4.2752845021  |
| H | 3.6290423551  | -1.8193527783 | 4.3431362626  |
| C | 0.6815539912  | -4.0878525267 | 1.6699998225  |
| C | 1.029667746   | -4.2032416038 | 0.3166811383  |
| H | 1.7626863323  | -3.5249474262 | -0.1129749901 |
| C | 0.4454011486  | -5.1809409278 | -0.4847927273 |
| H | 0.7263563215  | -5.2573021427 | -1.5315422605 |
| C | -0.5005540336 | -6.0502594064 | 0.0539297544  |
| H | -0.9597987399 | -6.8114557228 | -0.5707320119 |
| C | -0.8591154653 | -5.9382380875 | 1.3961144691  |
| H | -1.5975895918 | -6.6128434828 | 1.8212980919  |

|   |               |               |              |
|---|---------------|---------------|--------------|
| C | -0.2742512838 | -4.9623953841 | 2.2000672289 |
| H | -0.572562865  | -4.8826605047 | 3.241250178  |

XYZ coordinates of the optimized structure of **7F**

103

|    |               |               |               |
|----|---------------|---------------|---------------|
| Pt | 0.0766641256  | 0.0861066513  | -0.0897616355 |
| P  | 2.0317611923  | 1.3530453838  | -0.0000996898 |
| Cl | 0.107563566   | -0.0983302335 | -2.579659052  |
| As | 0.0601522877  | 0.1902142592  | 2.3771706979  |
| P  | -2.0341485813 | 1.0757050168  | -0.0053256345 |
| P  | 0.2710165214  | -2.2229716762 | 0.2089326476  |
| C  | 2.0244032756  | 0.4189203506  | 2.6436653372  |
| C  | 2.8053950826  | 0.9735031601  | 1.6199432693  |
| C  | 4.1599516236  | 1.2394148752  | 1.8538857928  |
| H  | 4.7580801537  | 1.7104105178  | 1.078966646   |
| C  | 4.7578499043  | 0.8806626368  | 3.0559890214  |
| H  | 5.8153537498  | 1.0731180165  | 3.2139758304  |
| C  | 3.9952677144  | 0.2681818111  | 4.0460055126  |
| H  | 4.4547968714  | -0.0339079746 | 4.9830582894  |
| C  | 2.6329343495  | 0.0610511707  | 3.8521892304  |
| H  | 2.0325349441  | -0.3684831554 | 4.6423728385  |
| C  | 3.2883892289  | 0.9569230685  | -1.2698415946 |
| C  | 3.1733098309  | 1.5659526067  | -2.5275409995 |
| H  | 2.3942838356  | 2.3014814445  | -2.7066285755 |
| C  | 4.0525759671  | 1.2391902442  | -3.5547369987 |
| H  | 3.9530054451  | 1.7255431411  | -4.5212341012 |
| C  | 5.0521319199  | 0.2904979925  | -3.3463371156 |
| H  | 5.7401930157  | 0.0371173071  | -4.1481996249 |
| C  | 5.1592230434  | -0.335241481  | -2.1074375484 |
| H  | 5.9306113989  | -1.0814681742 | -1.9365817154 |
| C  | 4.2801856567  | -0.0099796629 | -1.0764309437 |
| H  | 4.3720778299  | -0.5160806587 | -0.120954247  |
| C  | 2.0531945291  | 3.199952345   | 0.0044966045  |
| C  | 0.9151926779  | 3.888669045   | 0.4327561525  |
| H  | 0.0186117906  | 3.3330735731  | 0.6878694543  |
| C  | 0.9208815115  | 5.27787651    | 0.5366180587  |
| H  | 0.025984298   | 5.7943772264  | 0.8730252497  |
| C  | 2.0646591229  | 5.9971749094  | 0.2022669052  |
| H  | 2.0695157972  | 7.0812924365  | 0.275388184   |
| C  | 3.2040111782  | 5.3209529854  | -0.2314314938 |
| H  | 4.1000072645  | 5.8756284654  | -0.4970143644 |
| C  | 3.2017393874  | 3.9323751332  | -0.326466545  |
| H  | 4.0958957316  | 3.4219783897  | -0.6727408707 |
| C  | -1.1432651808 | 1.7604472737  | 2.5697633255  |
| C  | -2.0648644669 | 2.051611616   | 1.5535183294  |
| C  | -2.9393733915 | 3.1331433473  | 1.7085453276  |
| H  | -3.6637844886 | 3.356533336   | 0.931092763   |
| C  | -2.8655503054 | 3.9518904691  | 2.8305117832  |
| H  | -3.5365496605 | 4.8010752123  | 2.925290356   |

|   |               |               |               |
|---|---------------|---------------|---------------|
| C | -1.9213548146 | 3.6847842037  | 3.8171008051  |
| H | -1.8414296343 | 4.3295030066  | 4.6879516075  |
| C | -1.0786892344 | 2.5829611911  | 3.6986563812  |
| H | -0.3682779142 | 2.3551538465  | 4.4820541138  |
| C | -2.4862435544 | 2.3002454407  | -1.2964833009 |
| C | -1.4575673257 | 2.9309872586  | -2.0041137898 |
| H | -0.4299249343 | 2.6327945875  | -1.8233071759 |
| C | -1.7482944061 | 3.9160264211  | -2.9447960611 |
| H | -0.9386848724 | 4.3957668776  | -3.4879477535 |
| C | -3.070180559  | 4.2732858943  | -3.1979525768 |
| H | -3.2971000634 | 5.0367932183  | -3.9371128796 |
| C | -4.1027633776 | 3.642344882   | -2.5068393174 |
| H | -5.1369120586 | 3.9127154649  | -2.7023028298 |
| C | -3.8144567834 | 2.6614091196  | -1.5618069142 |
| H | -4.6300810256 | 2.1725803686  | -1.0361225137 |
| C | -3.5298399842 | 0.0179835775  | 0.1071293718  |
| C | -4.1040891765 | -0.5023945584 | -1.0620256218 |
| H | -3.7181772327 | -0.2081058788 | -2.0353181491 |
| C | -5.1749503259 | -1.3879693371 | -0.9892368606 |
| H | -5.6144546567 | -1.7750434505 | -1.9046543168 |
| C | -5.6812814284 | -1.7760802136 | 0.2500716313  |
| H | -6.5160699085 | -2.4691744618 | 0.3057923902  |
| C | -5.1128398443 | -1.2696974842 | 1.4160307467  |
| H | -5.5020076921 | -1.5650661749 | 2.3866545483  |
| C | -4.0464412559 | -0.3754819653 | 1.3470509091  |
| H | -3.6184812966 | 0.0159893753  | 2.2655369144  |
| C | -0.7865423067 | -1.5760164449 | 2.7058254079  |
| C | -0.6523496858 | -2.5884386904 | 1.7478803988  |
| C | -1.2529673883 | -3.8325559263 | 1.9662502058  |
| H | -1.1376208648 | -4.6228443779 | 1.2297292949  |
| C | -2.0224096078 | -4.0544449394 | 3.1039371591  |
| H | -2.5040042647 | -5.0170571114 | 3.251739579   |
| C | -2.1770183317 | -3.0380397613 | 4.0418400987  |
| H | -2.7863446107 | -3.1984203978 | 4.9270932906  |
| C | -1.5459611457 | -1.8105255953 | 3.8559179194  |
| H | -1.6417188424 | -1.0303163885 | 4.5995773107  |
| C | -0.4668741619 | -3.3683032091 | -1.0168495833 |
| C | -1.6226217098 | -2.9553562297 | -1.6867210613 |
| H | -2.0049307876 | -1.9549012991 | -1.5159068433 |
| C | -2.2699961119 | -3.8126264485 | -2.5708287746 |
| H | -3.1685445014 | -3.4783775277 | -3.0825283895 |
| C | -1.7601727069 | -5.0877205281 | -2.8075695929 |
| H | -2.2600077225 | -5.7543608829 | -3.5051529017 |
| C | -0.6045326104 | -5.5040606382 | -2.1508498549 |
| H | -0.2014660322 | -6.4971089153 | -2.3303269654 |
| C | 0.0395178087  | -4.6512730357 | -1.2565947997 |
| H | 0.9373721952  | -4.9893456476 | -0.7476531553 |
| C | 1.9264586458  | -2.9595845918 | 0.5013487801  |
| C | 2.8307257313  | -3.0043424845 | -0.5689597996 |

|   |              |               |               |
|---|--------------|---------------|---------------|
| H | 2.5403959422 | -2.6131516278 | -1.54121462   |
| C | 4.0990284067 | -3.5481677934 | -0.3959031188 |
| H | 4.785568151  | -3.587248345  | -1.2372981697 |
| C | 4.4912605871 | -4.0310517889 | 0.8525765762  |
| H | 5.484541195  | -4.4503600969 | 0.9873978858  |
| C | 3.6060116838 | -3.9714396396 | 1.9248173376  |
| H | 3.9045109922 | -4.34294005   | 2.9014190687  |
| C | 2.3265295398 | -3.444977014  | 1.7505351439  |
| H | 1.6400470155 | -3.4182852463 | 2.5919401918  |
| F | 0.0487191115 | 0.266962553   | 4.3376577645  |

XYZ coordinates of the optimized structure of **7F'**

103

|    |               |               |               |
|----|---------------|---------------|---------------|
| Pt | -0.0612959576 | -0.111016737  | 0.0446052622  |
| P  | 2.1862190059  | 0.2932509952  | -0.007386746  |
| Cl | -0.2864660516 | -0.2904076349 | -2.4055881945 |
| As | 0.0686994779  | -0.2443116197 | 2.4778693732  |
| P  | -2.2888041794 | 0.3198189959  | 0.3595128107  |
| P  | 1.7355560209  | -3.0528698282 | 1.5173481959  |
| C  | 1.9331094817  | 0.3921470155  | 2.7921266443  |
| C  | 2.7676426044  | 0.6240341746  | 1.6904267389  |
| C  | 4.0392793205  | 1.1777717497  | 1.8795877352  |
| H  | 4.671533563   | 1.3808297392  | 1.0185962852  |
| C  | 4.4965301821  | 1.4825462142  | 3.1561841383  |
| H  | 5.4847498541  | 1.912894584   | 3.2906964576  |
| C  | 3.6758024002  | 1.2361555447  | 4.2520917602  |
| H  | 4.0196987468  | 1.4703906505  | 5.2557847021  |
| C  | 2.4045568485  | 0.6962221949  | 4.0738931665  |
| H  | 1.7662011941  | 0.501664997   | 4.9244004713  |
| C  | 3.3914371779  | -0.8346032147 | -0.7920118111 |
| C  | 3.1891755792  | -1.1739607885 | -2.1369269158 |
| H  | 2.3276572015  | -0.7798671443 | -2.6697416662 |
| C  | 4.0786569045  | -2.0252366509 | -2.7864145813 |
| H  | 3.9123360192  | -2.2791670513 | -3.8295753758 |
| C  | 5.1707973385  | -2.5535586674 | -2.1017150553 |
| H  | 5.8646787151  | -3.2173717906 | -2.6099556283 |
| C  | 5.3665661294  | -2.232524966  | -0.7603388928 |
| H  | 6.2124233252  | -2.6460046453 | -0.2174849212 |
| C  | 4.4811137154  | -1.3792652673 | -0.1049699851 |
| H  | 4.6387258325  | -1.1498550891 | 0.9441644109  |
| C  | 2.4584350295  | 1.9168417974  | -0.8249964703 |
| C  | 1.6975984293  | 3.001507501   | -0.3646354894 |
| H  | 0.977655695   | 2.8526405744  | 0.4375516835  |
| C  | 1.8593355825  | 4.2634491528  | -0.9242883175 |
| H  | 1.2651631375  | 5.0958154256  | -0.5572142512 |
| C  | 2.7776432879  | 4.457661771   | -1.9563500718 |
| H  | 2.9000768905  | 5.4425634119  | -2.3983574817 |
| C  | 3.5363091983  | 3.3864683002  | -2.4165603106 |
| H  | 4.2554786561  | 3.5307451177  | -3.2181579866 |

|   |               |               |               |
|---|---------------|---------------|---------------|
| C | 3.3831852825  | 2.1201908297  | -1.8514206727 |
| H | 3.9857160755  | 1.2950052917  | -2.2180444015 |
| C | -1.3577634209 | 1.0616077094  | 2.8821162925  |
| C | -2.3785461954 | 1.2466505386  | 1.9366549337  |
| C | -3.4021083536 | 2.1666018712  | 2.1881388916  |
| H | -4.1879634466 | 2.317975514   | 1.4524665844  |
| C | -3.3981834522 | 2.9175499721  | 3.3599702214  |
| H | -4.1868821023 | 3.6425431424  | 3.5398319069  |
| C | -2.3757052972 | 2.7452092988  | 4.2889638884  |
| H | -2.3605105285 | 3.3386862294  | 5.1988896417  |
| C | -1.3689090252 | 1.8099222362  | 4.0600545293  |
| H | -0.5894672564 | 1.6536035952  | 4.7956367208  |
| C | -2.9999253608 | 1.4753395938  | -0.8662034256 |
| C | -2.2168222088 | 2.5546829949  | -1.2951468297 |
| H | -1.1960347082 | 2.6593666887  | -0.9364130866 |
| C | -2.7329122264 | 3.4787405815  | -2.1961261046 |
| H | -2.1161100751 | 4.3099754181  | -2.5262491864 |
| C | -4.030204742  | 3.3292450392  | -2.686620684  |
| H | -4.4293669248 | 4.0482332397  | -3.3966986356 |
| C | -4.8085940698 | 2.252985471   | -2.2720056422 |
| H | -5.8173203442 | 2.1274986041  | -2.655909913  |
| C | -4.2976449896 | 1.327136843   | -1.3629672156 |
| H | -4.9123900081 | 0.4896214798  | -1.0462915595 |
| C | -3.4761349129 | -1.061573405  | 0.4554499629  |
| C | -3.2265141348 | -2.1811366737 | -0.3469408306 |
| H | -2.3352196722 | -2.2083778408 | -0.9698285039 |
| C | -4.1139212223 | -3.2532857315 | -0.342803278  |
| H | -3.9142529133 | -4.1200596246 | -0.9664659666 |
| C | -5.2483289322 | -3.2174583947 | 0.4659768754  |
| H | -5.9375958067 | -4.057374014  | 0.4723967883  |
| C | -5.496529483  | -2.1076024293 | 1.2711729132  |
| H | -6.3776645219 | -2.0797288766 | 1.9062966816  |
| C | -4.6142659936 | -1.0304447125 | 1.2676539983  |
| H | -4.8095191897 | -0.1727384107 | 1.905747022   |
| C | -0.6262592109 | -2.086510474  | 2.6690267053  |
| C | 0.0463917233  | -3.226656974  | 2.2140922474  |
| C | -0.5757699207 | -4.4774629372 | 2.3398546928  |
| H | -0.056540732  | -5.3654265927 | 1.9879927112  |
| C | -1.8420927831 | -4.5948138244 | 2.8979606342  |
| H | -2.3129510407 | -5.5708477371 | 2.9779889204  |
| C | -2.4982356677 | -3.455837092  | 3.3619510896  |
| H | -3.4868226082 | -3.5344777696 | 3.8056795044  |
| C | -1.8894744083 | -2.2109163028 | 3.2580391593  |
| H | -2.3988544078 | -1.3327374614 | 3.6428239843  |
| C | 1.7249481183  | -4.3446731999 | 0.2085115965  |
| C | 1.1512252746  | -3.9813562529 | -1.0185262974 |
| H | 0.7670052389  | -2.9721628738 | -1.1589523468 |
| C | 1.0682786208  | -4.9000244891 | -2.0607295504 |
| H | 0.6174639016  | -4.6034068538 | -3.0042331563 |

|   |              |               |               |
|---|--------------|---------------|---------------|
| C | 1.573859135  | -6.1889836339 | -1.8996719494 |
| H | 1.516994043  | -6.9038477606 | -2.7162251487 |
| C | 2.1564678379 | -6.5553642145 | -0.6888650843 |
| H | 2.551991596  | -7.5590583866 | -0.5554262014 |
| C | 2.2288174973 | -5.6413823897 | 0.3611413623  |
| H | 2.6820759026 | -5.9413730652 | 1.3020290447  |
| C | 2.7911977321 | -3.7628163686 | 2.8440243419  |
| C | 4.1358399872 | -4.0475855346 | 2.5562365493  |
| H | 4.5066360978 | -3.9370888891 | 1.5397756576  |
| C | 5.001567461  | -4.4806393148 | 3.5555000054  |
| H | 6.0355790638 | -4.7082377284 | 3.3094731556  |
| C | 4.5474467559 | -4.6165254734 | 4.8665689394  |
| H | 5.2248561444 | -4.9495304093 | 5.6481831791  |
| C | 3.221598813  | -4.3178363716 | 5.1676126748  |
| H | 2.8584183914 | -4.4153464301 | 6.1873990092  |
| C | 2.3485614724 | -3.8957670944 | 4.1660936185  |
| H | 1.3170134797 | -3.6675391885 | 4.4185341736  |
| F | 0.0675002956 | -0.4879077942 | 4.4838462562  |

XYZ coordinates of the optimized structure of [7]BMe<sub>4</sub>  
119

|    |               |               |               |
|----|---------------|---------------|---------------|
| Pt | -0.0060906875 | -0.2139838656 | 0.187203274   |
| P  | -2.2733940686 | 0.1798434498  | 0.4956853016  |
| Cl | -0.1331155147 | -0.5277430821 | -2.159070601  |
| As | 0.104036332   | 0.1369625262  | 2.493158879   |
| P  | 2.2915772398  | 0.1489153386  | 0.1611944608  |
| P  | 1.5452204506  | -2.7760578467 | 2.6211416293  |
| C  | -1.2357788757 | 1.5321322225  | 2.7248009848  |
| C  | -2.2972760864 | 1.481214767   | 1.8011293881  |
| C  | -3.3184549878 | 2.4304767661  | 1.8818539982  |
| H  | -4.1359939449 | 2.4135442335  | 1.166233747   |
| C  | -3.279175136  | 3.4196357839  | 2.8632252052  |
| H  | -4.0727069576 | 4.1592353398  | 2.9117324162  |
| C  | -2.2220873627 | 3.4705842051  | 3.7668620489  |
| H  | -2.1850615174 | 4.2517214402  | 4.5201663709  |
| C  | -1.2007923372 | 2.5235579971  | 3.7030633885  |
| H  | -0.3762126739 | 2.5760954112  | 4.4078794648  |
| C  | -3.1678249922 | 0.9065607587  | -0.9107492747 |
| C  | -2.5976265787 | 2.0042145318  | -1.5691379044 |
| H  | -1.6354554175 | 2.3949438475  | -1.2482585739 |
| C  | -3.2567478745 | 2.5886565979  | -2.6434884439 |
| H  | -2.8110769748 | 3.4395072971  | -3.1504475993 |
| C  | -4.4794200161 | 2.0751700893  | -3.0771836119 |
| H  | -4.9895039775 | 2.5297762587  | -3.9216579867 |
| C  | -5.0422717303 | 0.9778207339  | -2.4329518233 |
| H  | -5.9915440995 | 0.572191369   | -2.7706376591 |
| C  | -4.3904369221 | 0.3913591687  | -1.3493255298 |
| H  | -4.8362252725 | -0.4637484802 | -0.850152939  |
| C  | -3.2877048362 | -1.1986096606 | 1.1091609676  |

|   |               |               |               |
|---|---------------|---------------|---------------|
| C | -2.9442469952 | -2.4973404796 | 0.7160163326  |
| H | -2.0625572364 | -2.6647814405 | 0.1015564112  |
| C | -3.7294691569 | -3.5741032604 | 1.1195040132  |
| H | -3.4577133627 | -4.5790461123 | 0.8118787868  |
| C | -4.8462944394 | -3.3613976988 | 1.9243564878  |
| H | -5.4539197974 | -4.2038434453 | 2.2424437056  |
| C | -5.18206761   | -2.0706008014 | 2.3295028471  |
| H | -6.0484768024 | -1.9045706776 | 2.9631677804  |
| C | -4.4078092535 | -0.9884480686 | 1.9228577384  |
| H | -4.6745097989 | 0.0148744748  | 2.2436034667  |
| C | 1.8890054294  | 0.7827215415  | 2.8815298151  |
| C | 2.8034654886  | 0.7654889752  | 1.8186053646  |
| C | 4.1000444233  | 1.2425576682  | 2.0320725333  |
| H | 4.8170314302  | 1.2568664558  | 1.2153438768  |
| C | 4.4815980569  | 1.7000227151  | 3.2906527644  |
| H | 5.4922108734  | 2.0656786926  | 3.4450913893  |
| C | 3.5752375548  | 1.6843359161  | 4.3484634635  |
| H | 3.8768048244  | 2.0342693777  | 5.3311107156  |
| C | 2.2761916673  | 1.2238762944  | 4.1471491876  |
| H | 1.5782979453  | 1.2013012064  | 4.9797838104  |
| C | 2.7270093558  | 1.5317208751  | -0.9490265037 |
| C | 1.8445480307  | 2.616119506   | -1.0308808441 |
| H | 0.9050712865  | 2.5882670561  | -0.4839319968 |
| C | 2.1636621564  | 3.7194355541  | -1.8142613213 |
| H | 1.4721642121  | 4.5548416093  | -1.875986736  |
| C | 3.3624895489  | 3.7468475106  | -2.525565853  |
| H | 3.6080771593  | 4.6061064136  | -3.1431264132 |
| C | 4.2423388145  | 2.6707564597  | -2.4481414317 |
| H | 5.1760551536  | 2.6873341457  | -3.0029442378 |
| C | 3.9303351009  | 1.5645219465  | -1.660397949  |
| H | 4.6215555748  | 0.728326235   | -1.610438775  |
| C | 3.4129724389  | -1.2119938435 | -0.2891758241 |
| C | 3.30834956    | -1.7319292771 | -1.5881686129 |
| H | 2.5965046399  | -1.3057227066 | -2.2902214862 |
| C | 4.1074534489  | -2.8028596771 | -1.9748087918 |
| H | 4.0222033804  | -3.1989450927 | -2.9825481123 |
| C | 5.0086580197  | -3.3669040227 | -1.0723330619 |
| H | 5.6298171801  | -4.2045994999 | -1.3762209104 |
| C | 5.1099748597  | -2.8568104951 | 0.2193112666  |
| H | 5.8060862538  | -3.2948362782 | 0.9288464311  |
| C | 4.3142325686  | -1.7829693968 | 0.6141420082  |
| H | 4.3954801481  | -1.4030291229 | 1.6272547648  |
| C | -0.3291848722 | -1.1524075913 | 3.895066086   |
| C | 0.3731642504  | -2.367892681  | 3.9781277783  |
| C | 0.1494643397  | -3.1927212236 | 5.08498179    |
| H | 0.7159185576  | -4.1149394605 | 5.1869898069  |
| C | -0.7844563173 | -2.8454568209 | 6.0583593754  |
| H | -0.9480266265 | -3.502136951  | 6.9080363252  |
| C | -1.5094201219 | -1.6640581494 | 5.9384328496  |



|   |               |               |               |
|---|---------------|---------------|---------------|
| H | -2.2440327454 | -1.3920729599 | 6.6905038303  |
| C | -1.279636939  | -0.8120530051 | 4.8604950742  |
| H | -1.832085116  | 0.1196992803  | 4.7903960854  |
| C | 2.8765882733  | -3.6702562091 | 3.5143028529  |
| C | 3.0868338691  | -5.0496891711 | 3.4201235283  |
| H | 2.413709859   | -5.6624921194 | 2.827084092   |
| C | 4.1585580501  | -5.645365067  | 4.0843727339  |
| H | 4.310255682   | -6.7183944603 | 4.0033307472  |
| C | 5.0274952902  | -4.8730240485 | 4.8499481559  |
| H | 5.8611904954  | -5.3400830953 | 5.3668408954  |
| C | 4.8279994582  | -3.4959701857 | 4.945898319   |
| H | 5.5061541053  | -2.8860081193 | 5.5365826048  |
| C | 3.7669566139  | -2.8972607127 | 4.2752845021  |
| H | 3.6290423551  | -1.8193527783 | 4.3431362626  |
| C | 0.6815539912  | -4.0878525267 | 1.6699998225  |
| C | 1.029667746   | -4.2032416038 | 0.3166811383  |
| H | 1.7626863323  | -3.5249474262 | -0.1129749901 |
| C | 0.4454011486  | -5.1809409278 | -0.4847927273 |
| H | 0.7263563215  | -5.2573021427 | -1.5315422605 |
| C | -0.5005540336 | -6.0502594064 | 0.0539297544  |
| H | -0.9597987399 | -6.8114557228 | -0.5707320119 |
| C | -0.8591154653 | -5.9382380875 | 1.3961144691  |
| H | -1.5975895918 | -6.6128434828 | 1.8212980919  |
| C | -0.2742512838 | -4.9623953841 | 2.2000672289  |
| H | -0.572562865  | -4.8826605047 | 3.241250178   |
| B | 0.2826026635  | 2.7979792296  | 8.1336055545  |
| C | 1.0256621643  | 3.8014585631  | 7.053075638   |
| C | -1.3393282837 | 2.7500617806  | 7.8289319898  |
| C | 0.9069814926  | 1.2765221606  | 7.9882352372  |
| C | 0.5399727491  | 3.3562019518  | 9.6653324044  |
| H | -1.8855480191 | 2.091593793   | 8.5273955478  |
| H | -1.5742866604 | 2.3742657662  | 6.8163536528  |
| H | -1.8239825814 | 3.7397176773  | 7.9050519744  |
| H | 2.1137420284  | 3.8818607658  | 7.2247697432  |
| H | 0.6375453378  | 4.8348780797  | 7.0814143975  |
| H | 0.9156397324  | 3.4699686557  | 6.0040039238  |
| H | 0.0720370759  | 2.7190845942  | 10.436117694  |
| H | 0.1356341279  | 4.3711414182  | 9.8263301246  |
| H | 1.6108925176  | 3.4131495549  | 9.9284322685  |
| H | 0.4952733247  | 0.5703604788  | 8.7305832583  |
| H | 2.0040650333  | 1.2424185643  | 8.1120376829  |
| H | 0.6949480825  | 0.8234462038  | 7.0026703178  |

XYZ coordinates of the optimized structure of **8**

102

|    |               |               |               |
|----|---------------|---------------|---------------|
| Pt | 0.0145453354  | -0.0270944721 | 0.05717902    |
| P  | -2.2624503367 | 0.3259943611  | 0.3766751699  |
| Cl | -0.0522001638 | 0.0499931076  | -2.3092889559 |
| Bi | 0.0942791181  | -0.0430920499 | 2.621195847   |

|   |               |               |               |
|---|---------------|---------------|---------------|
| P | 2.3260597298  | 0.2404924221  | 0.1385006622  |
| P | 1.5510442344  | -2.9538709195 | 2.902770981   |
| C | -1.5273001653 | 1.4413551598  | 2.8830968784  |
| C | -2.4405817629 | 1.4789941076  | 1.8139652108  |
| C | -3.503248987  | 2.3886649946  | 1.8605857402  |
| H | -4.2140787223 | 2.4381586168  | 1.0403268303  |
| C | -3.6501754917 | 3.2434070342  | 2.9514123977  |
| H | -4.4759740198 | 3.9484344595  | 2.9715894866  |
| C | -2.7423569127 | 3.2002354709  | 4.0049135418  |
| H | -2.852125762  | 3.8753068306  | 4.8487884417  |
| C | -1.681653085  | 2.2943643661  | 3.9736260953  |
| H | -0.9698125977 | 2.2739529381  | 4.7952611188  |
| C | -3.1553529712 | 1.140763782   | -0.9830535376 |
| C | -2.6320829118 | 2.3303190246  | -1.5069578431 |
| H | -1.7084932161 | 2.7421945428  | -1.1087470519 |
| C | -3.2892709434 | 2.9823093988  | -2.5430475854 |
| H | -2.8801033221 | 3.9049761682  | -2.944170665  |
| C | -4.4630303491 | 2.4461375153  | -3.0735707835 |
| H | -4.9716676384 | 2.9542701188  | -3.8878983891 |
| C | -4.9788688956 | 1.2586871034  | -2.5636254592 |
| H | -5.8902050172 | 0.8360607652  | -2.9766541289 |
| C | -4.3291983512 | 0.6041750827  | -1.5182396625 |
| H | -4.73974733   | -0.3203240861 | -1.1234615831 |
| C | -3.2218955765 | -1.1592068704 | 0.8140247544  |
| C | -2.7809506808 | -2.3947530243 | 0.3252999043  |
| H | -1.8735132905 | -2.4461967272 | -0.2720657846 |
| C | -3.4993541594 | -3.5528213697 | 0.6100169466  |
| H | -3.1483153023 | -4.5083955009 | 0.2324262814  |
| C | -4.6523394806 | -3.4833190178 | 1.3891711899  |
| H | -5.2090819399 | -4.3881596358 | 1.6160258657  |
| C | -5.0900656243 | -2.2560839994 | 1.8845300453  |
| H | -5.9861451469 | -2.2021460035 | 2.4960726712  |
| C | -4.3792388568 | -1.094044776  | 1.599437957   |
| H | -4.7241099246 | -0.1410757219 | 1.9916355587  |
| C | 2.0940734361  | 0.8065722886  | 2.9386433977  |
| C | 2.9021448701  | 0.8368696468  | 1.7942689702  |
| C | 4.1988876949  | 1.3576049916  | 1.9042254906  |
| H | 4.8399967389  | 1.4118268137  | 1.0282189222  |
| C | 4.6751420076  | 1.8145294035  | 3.1294348403  |
| H | 5.6829205628  | 2.2131456467  | 3.1974500655  |
| C | 3.8639158939  | 1.7667181874  | 4.2606104101  |
| H | 4.2348049779  | 2.1296841181  | 5.2147938194  |
| C | 2.5684781172  | 1.2612104017  | 4.1675440959  |
| H | 1.9383110736  | 1.2307681597  | 5.0525106947  |
| C | 2.8948718832  | 1.5578925956  | -0.9877239741 |
| C | 2.1358186464  | 2.7325137589  | -1.0588178304 |
| H | 1.212460655   | 2.8128183441  | -0.4900631729 |
| C | 2.5546319878  | 3.7854369995  | -1.8637374378 |
| H | 1.960195267   | 4.6929626066  | -1.9172900694 |

|   |               |               |               |
|---|---------------|---------------|---------------|
| C | 3.7281028817  | 3.6704825453  | -2.6089333758 |
| H | 4.0507439562  | 4.4913226421  | -3.2431141571 |
| C | 4.4823498354  | 2.5025231777  | -2.5446216171 |
| H | 5.3949146675  | 2.4083315518  | -3.1262348474 |
| C | 4.070796588   | 1.4457002379  | -1.7343518361 |
| H | 4.66413484    | 0.5368666646  | -1.6920372716 |
| C | 3.3259258173  | -1.2292759677 | -0.2637338797 |
| C | 3.1248585247  | -1.8215308254 | -1.5197247603 |
| H | 2.4087021528  | -1.3907049117 | -2.2155971612 |
| C | 3.8376657496  | -2.9627210278 | -1.8721780166 |
| H | 3.6813660541  | -3.4131942071 | -2.8481346912 |
| C | 4.7425837684  | -3.5293942333 | -0.9741043243 |
| H | 5.2942333465  | -4.4235187579 | -1.2500570578 |
| C | 4.9349028701  | -2.9506333031 | 0.2773918437  |
| H | 5.6318077784  | -3.3916121787 | 0.9843519421  |
| C | 4.2302487724  | -1.8019208772 | 0.6350092757  |
| H | 4.3850470302  | -1.3632202523 | 1.6155438461  |
| C | -0.3350838667 | -1.4707354069 | 4.2542673655  |
| C | 0.4216355254  | -2.6464074604 | 4.3142223843  |
| C | 0.256330751   | -3.4865225414 | 5.4214129139  |
| H | 0.8558568139  | -4.3896724688 | 5.5058685825  |
| C | -0.669602713  | -3.169969694  | 6.4128537886  |
| H | -0.7904054479 | -3.8302282066 | 7.2668621923  |
| C | -1.4447039219 | -2.0167270369 | 6.310878283   |
| H | -2.1699060056 | -1.7762290409 | 7.0828987404  |
| C | -1.2798161308 | -1.154647908  | 5.2269400034  |
| H | -1.8741389496 | -0.2472132109 | 5.1613717987  |
| C | 2.992298751   | -3.7836433348 | 3.6712463742  |
| C | 3.2052391706  | -5.1652688115 | 3.6228888555  |
| H | 2.4840053954  | -5.8093073079 | 3.1273525679  |
| C | 4.3428839892  | -5.7205273303 | 4.2061706767  |
| H | 4.4986830387  | -6.7950576119 | 4.1628407689  |
| C | 5.2743315006  | -4.9045846298 | 4.8430707501  |
| H | 6.1604470095  | -5.3404036982 | 5.2960637314  |
| C | 5.0709703548  | -3.5259127457 | 4.8924121588  |
| H | 5.7981379755  | -2.8840165945 | 5.3820758302  |
| C | 3.9420121696  | -2.9670140872 | 4.302473866   |
| H | 3.7981354625  | -1.8883368649 | 4.3301500987  |
| C | 0.7205658128  | -4.2689542308 | 1.9323617291  |
| C | 1.0743493155  | -4.3605623042 | 0.5786977419  |
| H | 1.8036236271  | -3.6704254562 | 0.1612386493  |
| C | 0.5015433648  | -5.3324729967 | -0.2369341797 |
| H | 0.7877567071  | -5.393536698  | -1.2832837215 |
| C | -0.4410432667 | -6.2155052425 | 0.2864129998  |
| H | -0.8914647684 | -6.9720004259 | -0.3503204684 |
| C | -0.8079059097 | -6.1231279048 | 1.6276172443  |
| H | -1.5449722615 | -6.8070226737 | 2.0396934038  |
| C | -0.2314784303 | -5.1558499521 | 2.4480837202  |
| H | -0.5318002107 | -5.0923509554 | 3.4899739093  |

XYZ coordinates of the optimized structure of **8F**

103

|    |               |               |               |
|----|---------------|---------------|---------------|
| Pt | 0.0286308951  | 0.0230203831  | -0.0152696579 |
| P  | 2.0417543357  | 1.2568809066  | 0.0934022029  |
| Cl | 0.0152337632  | -0.2184795028 | -2.4867708712 |
| Bi | 0.0059738609  | 0.1385347558  | 2.6281288548  |
| P  | -2.0108992551 | 1.1904010454  | 0.0324402182  |
| P  | 0.1997795971  | -2.2980490297 | 0.2761025089  |
| C  | 2.1208072485  | 0.7842696853  | 2.894163603   |
| C  | 2.8283902684  | 1.205960159   | 1.7671142766  |
| C  | 4.1298379565  | 1.7013587869  | 1.9412247932  |
| H  | 4.6856278924  | 2.0736521049  | 1.0847194823  |
| C  | 4.7204721998  | 1.7214808104  | 3.1991345344  |
| H  | 5.733664334   | 2.0973060333  | 3.3116255881  |
| C  | 4.0105600739  | 1.2704945401  | 4.310049608   |
| H  | 4.468853315   | 1.2858633242  | 5.2952619214  |
| C  | 2.703098918   | 0.8161557825  | 4.1619813688  |
| H  | 2.1235877673  | 0.4958459841  | 5.0202269998  |
| C  | 3.3529016645  | 0.7277571497  | -1.0696052453 |
| C  | 3.2064586201  | 1.0527953895  | -2.4269375556 |
| H  | 2.3477462876  | 1.6287520067  | -2.7580774729 |
| C  | 4.1533780439  | 0.64048114    | -3.3587882961 |
| H  | 4.0280719856  | 0.9082259939  | -4.4043654884 |
| C  | 5.2550318555  | -0.1113513116 | -2.9535206966 |
| H  | 5.9971589919  | -0.4284285213 | -3.6811379487 |
| C  | 5.3929326435  | -0.4617080281 | -1.6138517918 |
| H  | 6.2383957247  | -1.0620995791 | -1.2894518006 |
| C  | 4.4450432544  | -0.0532055526 | -0.6778278393 |
| H  | 4.5622542021  | -0.3515696199 | 0.3593501856  |
| C  | 2.0055213726  | 3.0947477113  | -0.1161113834 |
| C  | 0.9887593432  | 3.7968433235  | 0.542856312   |
| H  | 0.2157006449  | 3.2516425594  | 1.0790949842  |
| C  | 0.9493519171  | 5.1869401368  | 0.5157595799  |
| H  | 0.153246386   | 5.7120586258  | 1.0365484072  |
| C  | 1.9193336357  | 5.8989127784  | -0.1876876466 |
| H  | 1.8846641538  | 6.9843960848  | -0.2194956248 |
| C  | 2.9320134765  | 5.211111213   | -0.8502862198 |
| H  | 3.694305048   | 5.7573541449  | -1.3994779173 |
| C  | 2.9824409852  | 3.8182806905  | -0.8084840343 |
| H  | 3.7868349981  | 3.3007247212  | -1.3220344063 |
| C  | -1.5586976419 | 1.7194687127  | 2.7893724912  |
| C  | -2.2562376703 | 2.0907142544  | 1.6348845481  |
| C  | -3.1843539734 | 3.1376483087  | 1.728578337   |
| H  | -3.7364215027 | 3.4544802264  | 0.8497944891  |
| C  | -3.4024841352 | 3.7932152557  | 2.9359878184  |
| H  | -4.1182376463 | 4.6093925817  | 2.9811962949  |
| C  | -2.7081388521 | 3.4033945672  | 4.0777191337  |
| H  | -2.8766684213 | 3.9124824398  | 5.0228392608  |

|   |               |               |               |
|---|---------------|---------------|---------------|
| C | -1.7875750143 | 2.3608703658  | 4.0066911078  |
| H | -1.2399548681 | 2.0393548501  | 4.8851302993  |
| C | -2.2947535035 | 2.4655915767  | -1.260692629  |
| C | -1.1882857349 | 2.9916797362  | -1.933377918  |
| H | -0.2015928437 | 2.5988920538  | -1.7153334759 |
| C | -1.3489252458 | 3.9931078005  | -2.8882731598 |
| H | -0.477325187  | 4.3902158982  | -3.4013172431 |
| C | -2.6201004648 | 4.4724661921  | -3.1911058055 |
| H | -2.7467497064 | 5.2500743494  | -3.9395125118 |
| C | -3.7328958508 | 3.9421964232  | -2.5405002712 |
| H | -4.7297060519 | 4.3026954795  | -2.7794578975 |
| C | -3.5733614847 | 2.9432378891  | -1.5846815251 |
| H | -4.4535255036 | 2.5253734381  | -1.1038101385 |
| C | -3.5499870203 | 0.1853384559  | -0.066137296  |
| C | -4.0721674898 | -0.178588935  | -1.3155858097 |
| H | -3.6107026234 | 0.191743399   | -2.2270593449 |
| C | -5.1847091826 | -1.0119763443 | -1.40106739   |
| H | -5.5839423268 | -1.2733679447 | -2.3775233491 |
| C | -5.7822440554 | -1.5072147278 | -0.2438616768 |
| H | -6.6493995067 | -2.1580945299 | -0.3120561458 |
| C | -5.2617491786 | -1.161733524  | 1.0011414751  |
| H | -5.7211115053 | -1.5413325191 | 1.9097579277  |
| C | -4.1554797591 | -0.3199395477 | 1.0911290687  |
| H | -3.7694030725 | -0.0530478149 | 2.071416993   |
| C | -0.5274648721 | -1.9899513913 | 2.9934877761  |
| C | -0.4370488872 | -2.868509737  | 1.9126579173  |
| C | -0.8060259724 | -4.2074618117 | 2.1045473537  |
| H | -0.7425184222 | -4.9100108935 | 1.2782909297  |
| C | -1.2640198956 | -4.6445486219 | 3.3433936543  |
| H | -1.5581199901 | -5.682627843  | 3.4713869971  |
| C | -1.3437614858 | -3.7558915268 | 4.4127715355  |
| H | -1.702889469  | -4.0956195066 | 5.3805457412  |
| C | -0.9664928799 | -2.425505044  | 4.2427962643  |
| H | -1.0107543715 | -1.722611085  | 5.0667369303  |
| C | -0.6936173384 | -3.3876616663 | -0.8995105764 |
| C | -1.9487475384 | -2.9702203145 | -1.3503550489 |
| H | -2.325634234  | -1.9971942799 | -1.0522024163 |
| C | -2.7060608067 | -3.7852532402 | -2.1856587468 |
| H | -3.6798434947 | -3.4444564915 | -2.5266789667 |
| C | -2.2114428544 | -5.0233692867 | -2.5908497475 |
| H | -2.7983526986 | -5.656557244  | -3.2507638198 |
| C | -0.9587356354 | -5.4443842353 | -2.1514897089 |
| H | -0.5653447069 | -6.408145559  | -2.4634129654 |
| C | -0.2025036097 | -4.6335005229 | -1.3073768698 |
| H | 0.7720410439  | -4.9752334201 | -0.971672079  |
| C | 1.9015844786  | -2.988420548  | 0.2425816134  |
| C | 2.5883825908  | -2.9946254085 | -0.9795133242 |
| H | 2.1095762367  | -2.5957410575 | -1.870998898  |
| C | 3.8767027456  | -3.5116838093 | -1.0581510816 |

|   |               |               |               |
|---|---------------|---------------|---------------|
| H | 4.3930061108  | -3.5199000523 | -2.0138157698 |
| C | 4.5088838985  | -4.0000229766 | 0.0850040471  |
| H | 5.5172963804  | -4.3999748356 | 0.0220239776  |
| C | 3.845026057   | -3.9671059276 | 1.3078854483  |
| H | 4.3323253026  | -4.3394837422 | 2.2050415584  |
| C | 2.5440532459  | -3.4710320546 | 1.3875113393  |
| H | 2.0306549296  | -3.4703409885 | 2.3447955049  |
| F | -0.0343052391 | 0.2356099295  | 4.7827122404  |

XYZ coordinates of the optimized structure of **8F'**

103

|    |               |               |               |
|----|---------------|---------------|---------------|
| Pt | 0.0207681593  | 0.2102398229  | -0.0205919478 |
| P  | 2.3013343421  | 0.5295964945  | 0.0346931235  |
| Cl | -0.0863886015 | 0.2394872574  | -2.4622105227 |
| Bi | 0.0785602516  | -0.0465389572 | 2.6164180511  |
| P  | -2.2492370753 | 0.4379070769  | 0.2581941457  |
| P  | 1.5566901416  | -3.0710075438 | 1.6770442175  |
| C  | 2.2189853612  | 0.5675107409  | 2.8827065577  |
| C  | 2.978924986   | 0.7696117957  | 1.7297837274  |
| C  | 4.3068282106  | 1.2041024363  | 1.8598504123  |
| H  | 4.9082733556  | 1.3845013718  | 0.9723157283  |
| C  | 4.8644120286  | 1.4095345379  | 3.1163979427  |
| H  | 5.8941486853  | 1.745230638   | 3.2003615469  |
| C  | 4.0998364934  | 1.1883265894  | 4.2594717127  |
| H  | 4.5310355165  | 1.3489230383  | 5.2440253571  |
| C  | 2.7756580913  | 0.7704851034  | 4.1451166376  |
| H  | 2.1611249813  | 0.6049998241  | 5.0220586791  |
| C  | 3.4050525953  | -0.6941126761 | -0.7599182065 |
| C  | 3.2927018508  | -0.8874128086 | -2.1443166107 |
| H  | 2.5671221734  | -0.3129621518 | -2.7132803499 |
| C  | 4.0998156679  | -1.8185533718 | -2.7898858955 |
| H  | 4.0053613173  | -1.9567661201 | -3.8633697229 |
| C  | 5.0236828072  | -2.5689813605 | -2.064591807  |
| H  | 5.6570363281  | -3.2921143873 | -2.5709720997 |
| C  | 5.1309753452  | -2.3893535658 | -0.6881389821 |
| H  | 5.848546489   | -2.9702484307 | -0.1150746596 |
| C  | 4.3225781909  | -1.4605936372 | -0.0344204709 |
| H  | 4.4123156587  | -1.3371343029 | 1.0403493891  |
| C  | 2.7133124422  | 2.1197828771  | -0.7819037454 |
| C  | 1.8342372515  | 3.1944398141  | -0.5976923964 |
| H  | 0.9206584361  | 3.045600789   | -0.0262763477 |
| C  | 2.1204239964  | 4.4398834749  | -1.1466373399 |
| H  | 1.4296942382  | 5.2654640344  | -0.999328125  |
| C  | 3.2843622422  | 4.6236143853  | -1.8915245436 |
| H  | 3.5048069091  | 5.5945534172  | -2.326434328  |
| C  | 4.1608123203  | 3.5588004243  | -2.0815792835 |
| H  | 5.0677845922  | 3.6952518101  | -2.6640905916 |
| C  | 3.8802819595  | 2.31097561    | -1.5278385145 |
| H  | 4.5692956846  | 1.4868322224  | -1.6884452733 |

|   |               |               |               |
|---|---------------|---------------|---------------|
| C | -1.7272282461 | 1.2475282924  | 2.9084256345  |
| C | -2.5978082459 | 1.355206298   | 1.8163625427  |
| C | -3.7474638123 | 2.1486442721  | 1.9301211246  |
| H | -4.4283747816 | 2.2451435271  | 1.0882867708  |
| C | -4.0157362286 | 2.8297887875  | 3.1145919603  |
| H | -4.9034030231 | 3.4519248348  | 3.1876544874  |
| C | -3.1474975809 | 2.7148084552  | 4.1967509754  |
| H | -3.3532111336 | 3.2508650924  | 5.11957583    |
| C | -2.0088517355 | 1.9151435553  | 4.0983258608  |
| H | -1.3324234291 | 1.8040230259  | 4.9386762134  |
| C | -3.0849644625 | 1.4347077645  | -1.025491099  |
| C | -2.5336788434 | 2.678452097   | -1.3600349623 |
| H | -1.6190580229 | 3.0135977146  | -0.8772932673 |
| C | -3.1437950598 | 3.4800498763  | -2.317081638  |
| H | -2.7090883347 | 4.442950505   | -2.5701585635 |
| C | -4.3029479578 | 3.0432223871  | -2.9592225435 |
| H | -4.7758199121 | 3.6683079746  | -3.7116110348 |
| C | -4.8480470026 | 1.8038537424  | -2.6393213945 |
| H | -5.7473815351 | 1.4561833512  | -3.1400155519 |
| C | -4.2431045225 | 0.9995527457  | -1.6737317357 |
| H | -4.6770656315 | 0.0346317034  | -1.4290519077 |
| C | -3.2044417248 | -1.1149294878 | 0.3687292285  |
| C | -2.6906724592 | -2.2485352535 | -0.2713406245 |
| H | -1.7399783868 | -2.1873117905 | -0.794964869  |
| C | -3.3897792663 | -3.4516936129 | -0.2318384408 |
| H | -2.9805479516 | -4.3270493808 | -0.7284649274 |
| C | -4.6033122864 | -3.5309507578 | 0.4481550371  |
| H | -5.1463522634 | -4.4713830854 | 0.4830322711  |
| C | -5.1184695999 | -2.4056227556 | 1.088997179   |
| H | -6.0622918746 | -2.4659636514 | 1.6237623491  |
| C | -4.4221867299 | -1.2006993693 | 1.0527993166  |
| H | -4.8245139204 | -0.3311328863 | 1.5656471248  |
| C | -0.6496145493 | -2.0992105585 | 3.0784921937  |
| C | -0.0288935308 | -3.2532751137 | 2.5926846029  |
| C | -0.6238555505 | -4.497242515  | 2.8493230787  |
| H | -0.1552176163 | -5.4039906879 | 2.4757897109  |
| C | -1.8095479375 | -4.5831437362 | 3.5690400434  |
| H | -2.2627208863 | -5.553727455  | 3.7519522803  |
| C | -2.4114152348 | -3.4249941316 | 4.059875156   |
| H | -3.335244748  | -3.4876706818 | 4.6288166682  |
| C | -1.8294802658 | -2.1831777515 | 3.8210751818  |
| H | -2.2972854315 | -1.2841286256 | 4.2135070028  |
| C | 1.3504550581  | -4.227470543  | 0.2631409458  |
| C | 0.9295968914  | -3.6663068192 | -0.949853155  |
| H | 0.7923316229  | -2.5891100341 | -1.0262917031 |
| C | 0.6933500333  | -4.4725736047 | -2.0610679342 |
| H | 0.3662367991  | -4.0208085902 | -2.9938412118 |
| C | 0.8912846409  | -5.848879707  | -1.9786949675 |
| H | 0.7145592969  | -6.4784863029 | -2.8466434231 |

|   |              |               |               |
|---|--------------|---------------|---------------|
| C | 1.3271578477 | -6.4154733722 | -0.7820914877 |
| H | 1.4898229775 | -7.4880115872 | -0.7143390719 |
| C | 1.5547598164 | -5.6118216885 | 0.3323077536  |
| H | 1.9042119934 | -6.0652105481 | 1.2563201132  |
| C | 2.7465170399 | -3.9297215263 | 2.7832612642  |
| C | 3.9415646731 | -4.4448428158 | 2.2585436543  |
| H | 4.1084844446 | -4.4380030328 | 1.1845521236  |
| C | 4.9147477922 | -4.979462072  | 3.0978075016  |
| H | 5.8284852104 | -5.384281437  | 2.6702856259  |
| C | 4.7198969047 | -4.996894966  | 4.4775169219  |
| H | 5.4803626371 | -5.4133734244 | 5.1323621976  |
| C | 3.5436038838 | -4.4757984483 | 5.0105548204  |
| H | 3.3812517094 | -4.4832047376 | 6.0851883262  |
| C | 2.5646473555 | -3.9458364111 | 4.1727083208  |
| H | 1.6521659968 | -3.5451184868 | 4.606038567   |
| F | 0.110063667  | 0.0779111678  | 4.7926220885  |

XYZ coordinates of the optimized structure of **[8]BMe<sub>4</sub>**  
119

|    |               |               |               |
|----|---------------|---------------|---------------|
| Pt | 0.0145453354  | -0.0270944721 | 0.05717902    |
| P  | -2.2624503367 | 0.3259943611  | 0.3766751699  |
| Cl | -0.0522001638 | 0.0499931076  | -2.3092889559 |
| Bi | 0.0942791181  | -0.0430920499 | 2.621195847   |
| P  | 2.3260597298  | 0.2404924221  | 0.1385006622  |
| P  | 1.5510442344  | -2.9538709195 | 2.902770981   |
| C  | -1.5272885609 | 1.4413696573  | 2.8830871828  |
| C  | -2.4405817629 | 1.4789941076  | 1.8139652108  |
| C  | -3.503248987  | 2.3886649946  | 1.8605857402  |
| H  | -4.2140787223 | 2.4381586168  | 1.0403268303  |
| C  | -3.6501754917 | 3.2434070342  | 2.9514123977  |
| H  | -4.4759740198 | 3.9484344595  | 2.9715894866  |
| C  | -2.742355518  | 3.2002371441  | 4.0049123748  |
| H  | -2.852125762  | 3.8753068306  | 4.8487884417  |
| C  | -1.6816301215 | 2.2943035837  | 3.9736047     |
| H  | -0.9698745879 | 2.2740159567  | 4.7953023764  |
| C  | -3.1553529712 | 1.140763782   | -0.9830535376 |
| C  | -2.6320829118 | 2.3303190246  | -1.5069578431 |
| H  | -1.7084932161 | 2.7421945428  | -1.1087470519 |
| C  | -3.2892709434 | 2.9823093988  | -2.5430475854 |
| H  | -2.8801033221 | 3.9049761682  | -2.944170665  |
| C  | -4.4630303491 | 2.4461375153  | -3.0735707835 |
| H  | -4.9716676384 | 2.9542701188  | -3.8878983891 |
| C  | -4.9788688956 | 1.2586871034  | -2.5636254592 |
| H  | -5.8902050172 | 0.8360607652  | -2.9766541289 |
| C  | -4.3291983512 | 0.6041750827  | -1.5182396625 |
| H  | -4.73974733   | -0.3203240861 | -1.1234615831 |
| C  | -3.2218955765 | -1.1592068704 | 0.8140247544  |
| C  | -2.7809506808 | -2.3947530243 | 0.3252999043  |
| H  | -1.8735132905 | -2.4461967272 | -0.2720657846 |



|   |               |               |               |
|---|---------------|---------------|---------------|
| C | -3.4993541594 | -3.5528213697 | 0.6100169466  |
| H | -3.1483153023 | -4.5083955009 | 0.2324262814  |
| C | -4.6523394806 | -3.4833190178 | 1.3891711899  |
| H | -5.2090819399 | -4.3881596358 | 1.6160258657  |
| C | -5.0900656243 | -2.2560839994 | 1.8845300453  |
| H | -5.9861451469 | -2.2021460035 | 2.4960726712  |
| C | -4.3792388568 | -1.094044776  | 1.599437957   |
| H | -4.7241099246 | -0.1410757219 | 1.9916355587  |
| C | 2.0940680143  | 0.8065870189  | 2.9386400424  |
| C | 2.9021448701  | 0.8368696468  | 1.7942689702  |
| C | 4.1988876949  | 1.3576049916  | 1.9042254906  |
| H | 4.8399967389  | 1.4118268137  | 1.0282189222  |
| C | 4.6751420076  | 1.8145294035  | 3.1294348403  |
| H | 5.6829205628  | 2.2131456467  | 3.1974500655  |
| C | 3.8639139149  | 1.7667234839  | 4.2606091827  |
| H | 4.2348049779  | 2.1296841181  | 5.2147938194  |
| C | 2.5684667118  | 1.2611701801  | 4.1675345957  |
| H | 1.9383559073  | 1.2307699475  | 5.052515778   |
| C | 2.8948718832  | 1.5578925956  | -0.9877239741 |
| C | 2.1358186464  | 2.7325137589  | -1.0588178304 |
| H | 1.212460655   | 2.8128183441  | -0.4900631729 |
| C | 2.5546319878  | 3.7854369995  | -1.8637374378 |
| H | 1.960195267   | 4.6929626066  | -1.9172900694 |
| C | 3.7281028817  | 3.6704825453  | -2.6089333758 |
| H | 4.0507439562  | 4.4913226421  | -3.2431141571 |
| C | 4.4823498354  | 2.5025231777  | -2.5446216171 |
| H | 5.3949146675  | 2.4083315518  | -3.1262348474 |
| C | 4.070796588   | 1.4457002379  | -1.7343518361 |
| H | 4.66413484    | 0.5368666646  | -1.6920372716 |
| C | 3.3259258173  | -1.2292759677 | -0.2637338797 |
| C | 3.1248585247  | -1.8215308254 | -1.5197247603 |
| H | 2.4087021528  | -1.3907049117 | -2.2155971612 |
| C | 3.8376657496  | -2.9627210278 | -1.8721780166 |
| H | 3.6813660541  | -3.4131942071 | -2.8481346912 |
| C | 4.7425837684  | -3.5293942333 | -0.9741043243 |
| H | 5.2942333465  | -4.4235187579 | -1.2500570578 |
| C | 4.9349028701  | -2.9506333031 | 0.2773918437  |
| H | 5.6318077784  | -3.3916121787 | 0.9843519421  |
| C | 4.2302487724  | -1.8019208772 | 0.6350092757  |
| H | 4.3850470302  | -1.3632202523 | 1.6155438461  |
| C | -0.3350838667 | -1.4707354069 | 4.2542673655  |
| C | 0.4216355254  | -2.6464074604 | 4.3142223843  |
| C | 0.256330751   | -3.4865225414 | 5.4214129139  |
| H | 0.8558568139  | -4.3896724688 | 5.5058685825  |
| C | -0.669602713  | -3.169969694  | 6.4128537886  |
| H | -0.7904054479 | -3.8302282066 | 7.2668621923  |
| C | -1.4447039219 | -2.0167270369 | 6.310878283   |
| H | -2.1699060056 | -1.7762290409 | 7.0828987404  |
| C | -1.2798161308 | -1.154647908  | 5.2269400034  |

|   |               |               |               |
|---|---------------|---------------|---------------|
| H | -1.8741389496 | -0.2472132109 | 5.1613717987  |
| C | 2.992298751   | -3.7836433348 | 3.6712463742  |
| C | 3.2052391706  | -5.1652688115 | 3.6228888555  |
| H | 2.4840053954  | -5.8093073079 | 3.1273525679  |
| C | 4.3428839892  | -5.7205273303 | 4.2061706767  |
| H | 4.4986830387  | -6.7950576119 | 4.1628407689  |
| C | 5.2743315006  | -4.9045846298 | 4.8430707501  |
| H | 6.1604470095  | -5.3404036982 | 5.2960637314  |
| C | 5.0709703548  | -3.5259127457 | 4.8924121588  |
| H | 5.7981379755  | -2.8840165945 | 5.3820758302  |
| C | 3.9420121696  | -2.9670140872 | 4.302473866   |
| H | 3.7981354625  | -1.8883368649 | 4.3301500987  |
| C | 0.7205658128  | -4.2689542308 | 1.9323617291  |
| C | 1.0743493155  | -4.3605623042 | 0.5786977419  |
| H | 1.8036236271  | -3.6704254562 | 0.1612386493  |
| C | 0.5015433648  | -5.3324729967 | -0.2369341797 |
| H | 0.7877567071  | -5.393536698  | -1.2832837215 |
| C | -0.4410432667 | -6.2155052425 | 0.2864129998  |
| H | -0.8914647684 | -6.9720004259 | -0.3503204684 |
| C | -0.8079059097 | -6.1231279048 | 1.6276172443  |
| H | -1.5449722615 | -6.8070226737 | 2.0396934038  |
| C | -0.2314784303 | -5.1558499521 | 2.4480837202  |
| H | -0.5318002107 | -5.0923509554 | 3.4899739093  |
| B | 0.5706889468  | 2.5666754055  | 8.1065978084  |
| C | 1.0686557409  | 3.6045057175  | 6.9233807759  |
| C | -1.0784962534 | 2.5463915094  | 8.1698755005  |
| C | 1.1274893043  | 1.0462390787  | 7.7817163944  |
| C | 1.1699077123  | 3.0668744385  | 9.5595922278  |
| H | -1.4683466641 | 1.8688948679  | 8.9500019871  |
| H | -1.5447824468 | 2.215187509   | 7.2239610882  |
| H | -1.5098893098 | 3.5391594874  | 8.3882758344  |
| H | 2.1686512668  | 3.6590725884  | 6.8357742657  |
| H | 0.727438161   | 4.6410985184  | 7.0913280858  |
| H | 0.7030810536  | 3.329842903   | 5.9170960896  |
| H | 0.8687624153  | 2.4092375564  | 10.3938826576 |
| H | 0.8331113421  | 4.0815092572  | 9.8360761685  |
| H | 2.2734637904  | 3.0967861311  | 9.5798343911  |
| H | 0.8592063742  | 0.3129300991  | 8.5621704959  |
| H | 2.2274458685  | 1.0016351737  | 7.6904929165  |
| H | 0.7230547396  | 0.6321569571  | 6.8399502483  |

XYZ coordinates of the optimized structure of [NMe<sub>4</sub>]F  
18

|   |               |               |               |
|---|---------------|---------------|---------------|
| F | 0.0071840419  | 0.0627748138  | 3.2025571011  |
| C | 0.0022431822  | -1.397033002  | 0.5395368546  |
| N | 0.0007875159  | -0.0026411584 | 0.0014678014  |
| C | -1.2105042123 | 0.7031577015  | 0.5207518706  |
| C | 1.2145203079  | 0.7034678246  | 0.5145403496  |
| C | -0.002886567  | -0.0192370513 | -1.4845641939 |

|   |               |               |               |
|---|---------------|---------------|---------------|
| H | 0.8954915155  | -1.9090188308 | 0.1770816775  |
| H | -0.8926279588 | -1.9091702927 | 0.1813126668  |
| H | 0.0047662795  | -1.3063552155 | 1.6314385674  |
| H | -1.2056284561 | 1.7267569523  | 0.1416794843  |
| H | -2.0987697265 | 0.1779549839  | 0.1648959775  |
| H | -1.13516409   | 0.6767720456  | 1.6142709186  |
| H | 1.2073682449  | 1.7270717867  | 0.1354917621  |
| H | 2.1011137999  | 0.1785941768  | 0.154065479   |
| H | 1.1449494058  | 0.677127098   | 1.6084027624  |
| H | -0.897151249  | -0.5392588113 | -1.8317391038 |
| H | -0.0039038393 | 1.0086970919  | -1.8505309864 |
| H | 0.8897908058  | -0.5390491129 | -1.8361269886 |

XYZ coordinates of the optimized structure of [NMe<sub>4</sub>]Cl  
18

|    |               |               |               |
|----|---------------|---------------|---------------|
| Cl | 0.0088735313  | 0.0564050562  | 3.8816497745  |
| C  | 0.002158792   | -1.4010076641 | 0.499272007   |
| N  | 0.0007077076  | -0.0022867265 | -0.0272675625 |
| C  | -1.2147750394 | 0.7065024924  | 0.4771655109  |
| C  | 1.2185552382  | 0.7068331061  | 0.4709322891  |
| C  | -0.0029636777 | -0.0207606008 | -1.5167905605 |
| H  | 0.8953627895  | -1.9106366511 | 0.1350536958  |
| H  | -0.8929728856 | -1.9106417104 | 0.1398114722  |
| H  | 0.0050342291  | -1.3486101102 | 1.5908608126  |
| H  | -1.2069943638 | 1.7284804019  | 0.095421353   |
| H  | -2.1006641381 | 0.1798750889  | 0.1192456367  |
| H  | -1.1764084374 | 0.7012953201  | 1.5695263449  |
| H  | 1.2087553267  | 1.7286366075  | 0.0887337471  |
| H  | 2.1027410482  | 0.1802035559  | 0.1088235328  |
| H  | 1.1856128302  | 0.7020622034  | 1.5634715353  |
| H  | -0.897133906  | -0.5415396023 | -1.86206281   |
| H  | -0.0041539091 | 1.0067978493  | -1.8829197857 |
| H  | 0.8898438644  | -0.5409976164 | -1.8663949932 |

XYZ coordinates of the optimized structure of [NMe<sub>4</sub>]Br  
18

|    |               |               |               |
|----|---------------|---------------|---------------|
| Br | 0.01015663    | 0.0584795797  | 3.961450742   |
| C  | 0.0020361553  | -1.4003187714 | 0.4948887464  |
| N  | 0.0006249303  | -0.0024402881 | -0.0350773542 |
| C  | -1.2144999338 | 0.7059405881  | 0.4719165232  |
| C  | 1.2180154386  | 0.706299278   | 0.4659201977  |
| C  | -0.0028863626 | -0.0209034119 | -1.5240975436 |
| H  | 0.8956952449  | -1.9110782066 | 0.1333618719  |
| H  | -0.8935399646 | -1.9110378178 | 0.1380623411  |
| H  | 0.0048978622  | -1.3405230128 | 1.5866184147  |
| H  | -1.2065519862 | 1.7294058345  | 0.0941882612  |
| H  | -2.1013281674 | 0.1802969196  | 0.1148779165  |
| H  | -1.1715184993 | 0.695737198   | 1.5644327695  |
| H  | 1.2082140191  | 1.7295334316  | 0.0875783272  |

|   |               |              |               |
|---|---------------|--------------|---------------|
| H | 2.1032234634  | 0.1805552065 | 0.1050256378  |
| H | 1.1801208186  | 0.6966600926 | 1.5586277217  |
| H | -0.89705722   | -0.54164706  | -1.869502094  |
| H | -0.0040361354 | 1.0067387439 | -1.8901097703 |
| H | 0.890012707   | -0.541087304 | -1.8736307087 |

XYZ coordinates of the optimized structure of [NMe<sub>4</sub>]CN

19

|   |               |               |               |
|---|---------------|---------------|---------------|
| N | 0.0096100709  | 0.0459274323  | 4.766688592   |
| C | 0.0084078973  | 0.040936513   | 3.5907150566  |
| C | 0.0019398783  | -1.3934415405 | 0.499300333   |
| N | 0.0005825243  | -0.0005794387 | -0.0437888068 |
| C | -1.2115304028 | 0.7083676731  | 0.4693921015  |
| C | 1.2148531164  | 0.7087251408  | 0.4637542846  |
| C | -0.0027492164 | -0.0245332728 | -1.5307142738 |
| H | 0.8955023593  | -1.9073230084 | 0.1412447905  |
| H | -0.8933650562 | -1.9073041948 | 0.1455800338  |
| H | 0.0045686414  | -1.3081603455 | 1.5906791756  |
| H | -1.2054279174 | 1.7313073567  | 0.0895185237  |
| H | -2.1003242915 | 0.1827689138  | 0.116506749   |
| H | -1.1495289747 | 0.6913707563  | 1.5620948767  |
| H | 1.2069292719  | 1.7314720035  | 0.0833663976  |
| H | 2.1021475905  | 0.1831057384  | 0.1071441748  |
| H | 1.1577233278  | 0.6921933211  | 1.5567286514  |
| H | -0.8969124859 | -0.5467966669 | -1.8744219025 |
| H | -0.0038468585 | 1.0016433285  | -1.9013191255 |
| H | 0.8901835676  | -0.546293896  | -1.8783805309 |

XYZ coordinates of the optimized structure of [NMe<sub>4</sub>]SCN

20

|   |               |               |               |
|---|---------------|---------------|---------------|
| N | 0.2138857396  | 0.27499614    | 3.4972065738  |
| C | 0.5637189084  | 0.622105621   | 4.5690383619  |
| S | 1.0509148795  | 1.1057367876  | 6.0710547218  |
| C | 0.051985305   | -1.4447907584 | 0.6897395004  |
| N | -0.106291248  | -0.1113618856 | 0.0328916872  |
| C | -1.3229397617 | 0.5597535296  | 0.5844705346  |
| C | 1.0925653073  | 0.7264422655  | 0.3407479311  |
| C | -0.2429821017 | -0.2828702595 | -1.4397783352 |
| H | 0.9448273756  | -1.9265450771 | 0.2883963421  |
| H | -0.8295079012 | -2.0484700227 | 0.468533892   |
| H | 0.1493622618  | -1.2742913323 | 1.7641049084  |
| H | -1.4289068601 | 1.5360054354  | 0.1088096886  |
| H | -2.1932323957 | -0.060048831  | 0.363044186   |
| H | -1.1829900688 | 0.6638847629  | 1.6626430161  |
| H | 0.9710852052  | 1.6991312525  | -0.1380415596 |
| H | 1.9788840807  | 0.2251368416  | -0.0510371056 |
| H | 1.1535596601  | 0.8310866438  | 1.4262628261  |
| H | -1.1206540995 | -0.897725497  | -1.643533136  |
| H | -0.3590542936 | 0.6988926308  | -1.9009171366 |

H 0.6529409466 -0.7727459202 -1.8238062746

XYZ coordinates of the optimized structure of [NMe<sub>4</sub>]BMe<sub>4</sub>  
34

B 0.008821885 -0.0016337119 -2.5312913819  
C 0.0230167927 1.5636337892 -2.0062255813  
C -1.3626427352 -0.7488162003 -1.9977045302  
C 0.0331195352 -0.0281973037 -4.1805865419  
C 1.3398199438 -0.7924151539 -1.9578559147  
H 0.9257913903 2.1163785453 -2.3193281309  
H -0.0151136069 1.6563014814 -0.9043900673  
H -0.8362992162 2.1472319292 -2.379693044  
H -1.4357001504 -1.7980361642 -2.3322569141  
H -2.283219088 -0.2518532711 -2.3498396785  
H -1.4475774666 -0.7828340937 -0.89525781  
H 0.0201013736 -1.0530066417 -4.5909039103  
H 0.9300065054 0.4565673304 -4.6040468827  
H -0.8323357106 0.4888383652 -4.6303730602  
H 1.3664772202 -1.8571621982 -2.2478916886  
H 1.4194720194 -0.783332999 -0.8548751958  
H 2.2843226239 -0.3538597309 -2.3236195352  
N -0.0081810361 0.0009904819 2.470565042  
C 1.1601514862 0.7861918579 1.9693086555  
C 0.0638532138 -1.3916832315 1.9336068616  
C 0.0172719639 -0.0363701653 3.9621475572  
C -1.2738096941 0.6472839255 2.0091150658  
H 1.0936849947 1.8024097343 2.3600011805  
H 1.1319696378 0.7993150954 0.8786316851  
H 2.077628752 0.309866734 2.3167556401  
H -0.7922882631 -1.9561513799 2.3045655857  
H 0.0440377293 -1.349407313 0.843547198  
H 0.9924488359 -1.8509297263 2.2747930162  
H -0.8424181161 -0.6072010441 4.3150087442  
H -0.0309056465 0.9851105132 4.3410898123  
H 0.9424992007 -0.5134669982 4.2873672529  
H -1.2789975878 0.6701026891 0.918334649  
H -2.1196812368 0.0656954508 2.3779176889  
H -1.3141955497 1.6616094038 2.4077042326

XYZ coordinates of the optimized structure of PPh<sub>3</sub>  
34

P 2.1904612189 0.1854721251 0.2717550849  
C 1.9490206 0.8954595348 2.9436226488  
C 2.7668946927 1.0148178599 1.8113354731  
C 3.9505221062 1.7564572551 1.9108062828  
H 4.5941700258 1.8666777307 1.0419313551  
C 4.3106671616 2.3555071037 3.1164865924  
H 5.2316351022 2.9294230957 3.1785785346  
C 3.4964272521 2.2183805659 4.2388712632

|   |              |               |               |
|---|--------------|---------------|---------------|
| H | 3.7787514604 | 2.6870954914  | 5.1777317172  |
| C | 2.3144832431 | 1.4848371972  | 4.1509546253  |
| H | 1.6706891629 | 1.3801828888  | 5.0202182246  |
| C | 3.0102403091 | -1.4600908971 | 0.3751280441  |
| C | 2.4849887729 | -2.4842670016 | -0.4251890819 |
| H | 1.6242011016 | -2.2828684542 | -1.0598002074 |
| C | 3.0495953619 | -3.7568822062 | -0.4139746178 |
| H | 2.6323220266 | -4.5388591192 | -1.0428152998 |
| C | 4.1382936162 | -4.0291595468 | 0.4127236681  |
| H | 4.5743302448 | -5.0243566748 | 0.4300909998  |
| C | 4.6603503808 | -3.0229441854 | 1.2229643369  |
| H | 5.5069827286 | -3.2307236589 | 1.8721747044  |
| C | 4.102465948  | -1.745956679  | 1.2034717546  |
| H | 4.5193610067 | -0.9671342602 | 1.8366993532  |
| C | 3.1735215918 | 1.0383907536  | -1.0308431411 |
| C | 4.4444851498 | 0.6298439322  | -1.4533549648 |
| H | 4.910812358  | -0.2411531445 | -1.0003006977 |
| C | 5.1175358561 | 1.3317999807  | -2.4516648069 |
| H | 6.1029465581 | 1.0021909656  | -2.7706394407 |
| C | 4.5326691523 | 2.4526175556  | -3.0374836334 |
| H | 5.0588162458 | 2.9978630335  | -3.8164085386 |
| C | 3.2668578305 | 2.8671286382  | -2.6266249819 |
| H | 2.8013235018 | 3.7358540943  | -3.0844889948 |
| C | 2.589582135  | 2.1593815529  | -1.6372671367 |
| H | 1.5942858011 | 2.4777079254  | -1.3334224915 |
| H | 1.0165102965 | 0.3385065479  | 2.8769333718  |

XYZ coordinates of the optimized structure of  $\text{SbPh}_3$

34

|    |              |               |               |
|----|--------------|---------------|---------------|
| Sb | 1.7788298757 | 0.1767843974  | 0.2084126433  |
| C  | 1.8934528457 | 0.9818755822  | 3.1835737394  |
| C  | 2.6112475077 | 1.092537034   | 1.986175636   |
| C  | 3.8201417166 | 1.7973052114  | 1.9885527663  |
| C  | 4.3045773123 | 2.3697125279  | 3.1643295945  |
| C  | 3.5856402306 | 2.2459250409  | 4.3514243164  |
| C  | 2.3784546478 | 1.5503614397  | 4.3601765535  |
| C  | 2.8948352976 | -1.6757383461 | 0.3272433016  |
| C  | 2.4763783627 | -2.7501044353 | -0.4677012366 |
| C  | 3.1528663212 | -3.9682631682 | -0.4325999457 |
| C  | 4.2530845674 | -4.129802956  | 0.4067818546  |
| C  | 4.6738167308 | -3.0705102993 | 1.2082475076  |
| C  | 3.9984219753 | -1.8510937135 | 1.1695551857  |
| C  | 3.0729837421 | 1.1674079786  | -1.2181663848 |
| C  | 4.3408020138 | 0.6871055893  | -1.5643735305 |
| C  | 5.1260894788 | 1.3666598028  | -2.4951758334 |
| C  | 4.6529407236 | 2.5334671216  | -3.0918963691 |
| C  | 3.3902087609 | 3.0186794635  | -2.7581642021 |
| C  | 2.6045964419 | 2.3363822951  | -1.8308901732 |
| H  | 0.9443290208 | 0.449020549   | 3.2067216914  |

|   |              |               |               |
|---|--------------|---------------|---------------|
| H | 4.3900942088 | 1.9033499342  | 1.0684790437  |
| H | 5.2455288639 | 2.9142930048  | 3.151930126   |
| H | 3.9633661793 | 2.6937314249  | 5.2668789242  |
| H | 1.8110867569 | 1.453421472   | 5.2823875821  |
| H | 1.6133660495 | -2.6439776961 | -1.1228567992 |
| H | 2.81756337   | -4.7921141752 | -1.0575932503 |
| H | 4.7791743479 | -5.0803016876 | 0.4389943536  |
| H | 5.5299204298 | -3.1929103553 | 1.8671912434  |
| H | 4.3355633325 | -1.0334789506 | 1.8023883709  |
| H | 4.7213782619 | -0.2234884551 | -1.1075931053 |
| H | 6.1094792792 | 0.9824753837  | -2.7549132058 |
| H | 5.2652764509 | 3.0614230412  | -3.8182277008 |
| H | 3.0139036299 | 3.9264977116  | -3.2229778626 |
| H | 1.6168032665 | 2.7245672323  | -1.5881148346 |

XYZ coordinates of the optimized structure of AsPh<sub>3</sub>

34

|    |              |               |               |
|----|--------------|---------------|---------------|
| As | 2.0215581135 | 0.181142034   | 0.2461387811  |
| C  | 1.9477609152 | 0.8984607366  | 3.0429218043  |
| C  | 2.706665197  | 1.0459194351  | 1.8756850524  |
| C  | 3.8790952178 | 1.8064826751  | 1.921842532   |
| C  | 4.2881421068 | 2.4001713864  | 3.1150062599  |
| C  | 3.5317714672 | 2.2392538537  | 4.273915809   |
| C  | 2.3602815832 | 1.4855271553  | 4.2367745748  |
| C  | 2.9654284813 | -1.54197106   | 0.3596671953  |
| C  | 2.5070923397 | -2.5750349634 | -0.4667371921 |
| C  | 3.1160015314 | -3.8274951215 | -0.4414692835 |
| C  | 4.1836674118 | -4.0655681341 | 0.4218079083  |
| C  | 4.6401596355 | -3.0467398963 | 1.255303829   |
| C  | 4.0355456481 | -1.7909839276 | 1.2245761831  |
| C  | 3.1344207674 | 1.084078749   | -1.102607659  |
| C  | 4.3837430969 | 0.6183384025  | -1.5236750686 |
| C  | 5.1019989081 | 1.3090185901  | -2.4987016819 |
| C  | 4.581270658  | 2.4723362777  | -3.0613005388 |
| C  | 3.3357447493 | 2.9426658116  | -2.6496658297 |
| C  | 2.6147187587 | 2.2482919474  | -1.6812284699 |
| H  | 1.0247537153 | 0.3221591475  | 3.0214338172  |
| H  | 4.4759494138 | 1.9380817605  | 1.0231198408  |
| H  | 5.2011767641 | 2.9897079977  | 3.1380770901  |
| H  | 3.8517792922 | 2.7039712225  | 5.20270692    |
| H  | 1.7628125166 | 1.360098638   | 5.136015392   |
| H  | 1.66575509   | -2.402992605  | -1.1353859162 |
| H  | 2.7517023622 | -4.6192905541 | -1.0908397038 |
| H  | 4.6556501683 | -5.044115353  | 0.4481765244  |
| H  | 5.4707975703 | -3.2282718942 | 1.9326594626  |
| H  | 4.3990555905 | -1.002851998  | 1.8787483619  |
| H  | 4.7989211768 | -0.2878937327 | -1.0905935226 |
| H  | 6.0718595533 | 0.9363027349  | -2.8183416547 |
| H  | 5.1423528029 | 3.0086171345  | -3.8219583659 |

|   |              |              |               |
|---|--------------|--------------|---------------|
| H | 2.9213589236 | 3.8468856943 | -3.0878487422 |
| H | 1.6372104729 | 2.6168968556 | -1.3760237093 |

XYZ coordinates of the optimized structure of BiPh<sub>3</sub>

34

|    |              |               |               |
|----|--------------|---------------|---------------|
| Bi | 1.6842312092 | 0.1809339332  | 0.1911630705  |
| C  | 1.8878756459 | 0.9898720743  | 3.2295684011  |
| C  | 2.5852423704 | 1.1082795339  | 2.0217819563  |
| C  | 3.794812628  | 1.8101167881  | 2.0087837381  |
| C  | 4.3004220788 | 2.3740264629  | 3.1805581137  |
| C  | 3.6004635396 | 2.2449228258  | 4.3784323094  |
| C  | 2.3921733871 | 1.551571751   | 4.4022254984  |
| C  | 2.8728683125 | -1.7149743057 | 0.315969112   |
| C  | 2.4588210171 | -2.8036646443 | -0.4601667003 |
| C  | 3.1513558813 | -4.0135213681 | -0.4185152229 |
| C  | 4.2657772559 | -4.1497371494 | 0.4064748308  |
| C  | 4.6838872565 | -3.0742387994 | 1.1876125513  |
| C  | 3.9902050522 | -1.8645818809 | 1.1437901916  |
| C  | 3.0605994189 | 1.1976394749  | -1.2561487837 |
| C  | 4.3345246529 | 0.7144338822  | -1.5716129116 |
| C  | 5.1409391904 | 1.3871050586  | -2.4901741071 |
| C  | 4.6812388101 | 2.5492912911  | -3.1063229753 |
| C  | 3.4118736001 | 3.0371509863  | -2.8032321273 |
| C  | 2.6068974691 | 2.3624414358  | -1.8858164896 |
| H  | 0.9395669952 | 0.4555544141  | 3.2683717567  |
| H  | 4.3503881418 | 1.9212686621  | 1.0801777499  |
| H  | 5.2426423608 | 2.9164338804  | 3.1565568517  |
| H  | 3.9941801322 | 2.6858112419  | 5.2905987134  |
| H  | 1.8401258354 | 1.4492980192  | 5.3333746232  |
| H  | 1.5874189238 | -2.7189543664 | -1.1080339146 |
| H  | 2.8187607524 | -4.8498412751 | -1.0285959391 |
| H  | 4.8055057382 | -5.0925142365 | 0.4425302848  |
| H  | 5.5516063446 | -3.176636722  | 1.8350121164  |
| H  | 4.3252354614 | -1.0348461636 | 1.7624080018  |
| H  | 4.7050902555 | -0.1936414535 | -1.1010292917 |
| H  | 6.1298399225 | 1.0009314838  | -2.7257503204 |
| H  | 5.3094099608 | 3.0718753972  | -3.8230753299 |
| H  | 3.0462895234 | 3.9420589733  | -3.2825562771 |
| H  | 1.615932876  | 2.7573337951  | -1.6661594807 |

XYZ coordinates of the optimized structure of **2<sub>m</sub>**

44

|    |               |               |              |
|----|---------------|---------------|--------------|
| Pd | -0.21252309   | 0.1752672249  | 0.5648306663 |
| P  | -2.4867014282 | -0.2714328868 | 0.6202119347 |
| Cl | -0.5200024378 | 0.3918307391  | -1.781626174 |
| Sb | 0.0295843469  | -0.0178074154 | 3.1124059788 |
| P  | 2.0296404852  | 0.6967188528  | 0.3248437037 |
| C  | -1.5914121497 | 0.948141107   | 4.0938881048 |
| C  | -2.12734624   | 0.4196727596  | 5.2719855653 |



|   |               |               |               |
|---|---------------|---------------|---------------|
| C | -3.188767889  | 1.0695552863  | 5.8979570165  |
| H | -3.6068020431 | 0.6576024039  | 6.8119168004  |
| C | -3.7136131205 | 2.2398505292  | 5.353339313   |
| H | -4.5418664666 | 2.7420552948  | 5.8447903154  |
| C | -3.1820549091 | 2.7648888051  | 4.1774520362  |
| H | -3.5919197646 | 3.6755625887  | 3.7502511094  |
| C | -2.1234062423 | 2.1189943206  | 3.541791998   |
| H | -1.722926656  | 2.5344264752  | 2.6189252365  |
| C | 1.7686241545  | 0.8683079796  | 3.9586026112  |
| C | 2.9513231366  | 0.1279610508  | 4.0701858891  |
| C | 4.0950016529  | 0.7283035257  | 4.5934121516  |
| H | 5.0102207195  | 0.1509458246  | 4.687324419   |
| C | 4.0615590301  | 2.0610253623  | 4.9982618875  |
| H | 4.9546567588  | 2.5257611463  | 5.4059254371  |
| C | 2.8836974562  | 2.7977001265  | 4.8872381888  |
| H | 2.8553486235  | 3.8343601856  | 5.2101910309  |
| C | 1.735335155   | 2.2057734967  | 4.367364904   |
| H | 0.8187589687  | 2.7866528169  | 4.2974169263  |
| C | 0.0777655277  | -2.0136234788 | 3.8242401205  |
| C | 0.5360476783  | -2.2853739758 | 5.1186211718  |
| H | 0.8970849832  | -1.4880123793 | 5.7633653037  |
| C | 0.5407986007  | -3.597790376  | 5.5856099489  |
| H | 0.8951649323  | -3.8088853562 | 6.5903799767  |
| C | 0.0982518618  | -4.6338761286 | 4.7658865983  |
| H | 0.1068598921  | -5.6559065274 | 5.1334740993  |
| C | -0.3493527485 | -4.3641786412 | 3.4743195053  |
| H | -0.6874418218 | -5.1728148363 | 2.8328818832  |
| C | -0.3598321487 | -3.0548448589 | 2.9994585657  |
| H | -0.7031201781 | -2.8540314171 | 1.9870930969  |
| H | -1.7306958217 | -0.4954958051 | 5.7040775837  |
| H | 2.98720112    | -0.9166398052 | 3.7692055619  |
| H | -3.2542776749 | 0.8049434698  | 0.1479530426  |
| H | -2.8682289969 | -1.3053423987 | -0.2492216643 |
| H | -3.1864826519 | -0.6140820924 | 1.7914164366  |
| H | 2.4659440546  | 0.708888991   | -1.0094473651 |
| H | 2.4144163743  | 1.9725504285  | 0.7719790373  |
| H | 3.0049198866  | -0.1040068225 | 0.9429748763  |

XYZ coordinates of the optimized structure of **2<sub>m</sub>F**

45

|    |               |               |               |
|----|---------------|---------------|---------------|
| Pd | -0.0434124393 | -0.3427745094 | -0.0351771656 |
| P  | -2.3069324005 | -0.7950883125 | -0.0457014796 |
| Cl | -0.1455501809 | -0.2596630293 | -2.5245293592 |
| Sb | -0.0166771767 | -0.3067227087 | 2.6377310522  |
| P  | 2.2521179613  | -0.2279685804 | -0.1827401947 |
| C  | -1.8034359733 | 0.8759922819  | 2.8774480477  |
| C  | -2.0874964362 | 1.8762589541  | 1.9430051481  |
| C  | -3.2283658311 | 2.6657214269  | 2.0856330525  |
| H  | -3.4330725856 | 3.453103292   | 1.3651196946  |

|   |               |               |               |
|---|---------------|---------------|---------------|
| C | -4.1027336044 | 2.4396171932  | 3.1464464314  |
| H | -4.9979534974 | 3.0462897373  | 3.2518424336  |
| C | -3.8254896959 | 1.4373268849  | 4.0740741426  |
| H | -4.5052430214 | 1.2594849885  | 4.9031939734  |
| C | -2.6719345102 | 0.6640965297  | 3.9510837532  |
| H | -2.443359799  | -0.0926030552 | 4.6938636998  |
| C | 1.7527092837  | 0.8697457956  | 2.9554690691  |
| C | 1.9372124061  | 2.044562668   | 2.2221264303  |
| C | 3.0757582221  | 2.8242547267  | 2.424535826   |
| H | 3.2048913094  | 3.7463736969  | 1.8641964949  |
| C | 4.0440613178  | 2.4177894878  | 3.3401757045  |
| H | 4.9361057668  | 3.0194643112  | 3.4908935264  |
| C | 3.8653484694  | 1.2411748792  | 4.0656295907  |
| H | 4.6184446735  | 0.9228035707  | 4.7815105939  |
| C | 2.7164527243  | 0.4722735258  | 3.885031566   |
| H | 2.5710100875  | -0.4273330802 | 4.4755560382  |
| C | 0.048365243   | -2.4580915104 | 2.8523408698  |
| C | 0.1859765003  | -3.2407430277 | 1.7026988949  |
| H | 0.2533480533  | -2.7648600102 | 0.7245208432  |
| C | 0.2373999024  | -4.6307112912 | 1.7965664057  |
| H | 0.3478391384  | -5.2285392252 | 0.895762315   |
| C | 0.1463423321  | -5.2462206878 | 3.042516632   |
| H | 0.1839096469  | -6.3295732694 | 3.1186071695  |
| C | 0.0073394454  | -4.4697117672 | 4.1911444225  |
| H | -0.0640874996 | -4.9467938249 | 5.1650940982  |
| C | -0.0395857586 | -3.0795038784 | 4.1028108733  |
| H | -0.1417351987 | -2.475450889  | 4.9960689372  |
| F | -0.0567847889 | -0.339651556  | 4.6918252431  |
| H | 1.1974850587  | 2.3637144081  | 1.4896606911  |
| H | -1.4240833538 | 2.049128272   | 1.0963963472  |
| H | -3.0763764407 | -1.1149469689 | 1.0904412012  |
| H | -3.1275205813 | 0.1944026798  | -0.6176838758 |
| H | -2.6287229736 | -1.8864644848 | -0.8744934308 |
| H | 2.7544954425  | -1.0797415028 | -1.1847043239 |
| H | 2.7966981196  | 0.9963609017  | -0.6128258293 |
| H | 3.1399436429  | -0.5281250429 | 0.868028446   |

XYZ coordinates of the optimized structure of **3<sub>m</sub>**

48

|    |               |               |               |
|----|---------------|---------------|---------------|
| Pd | 0.3017592932  | -0.119406266  | 0.3323718344  |
| P  | -1.5136962486 | 1.2674846576  | -0.0199675207 |
| Cl | 0.935834619   | 0.4269901755  | -1.9480714772 |
| Sb | 0.0512536801  | 0.0333062893  | 2.8821425904  |
| P  | 2.448133419   | -0.9808088478 | 0.5002620333  |
| P  | -0.9203237653 | -2.3454438531 | -0.6043549546 |
| C  | -1.5352890875 | 1.2454375484  | 3.6211590529  |
| C  | -2.8304685678 | 0.7225846587  | 3.7142375641  |
| C  | -3.8733598973 | 1.5324955849  | 4.1586121333  |
| H  | -4.8764700172 | 1.1232723601  | 4.237573693   |

|   |               |               |               |
|---|---------------|---------------|---------------|
| C | -3.628386659  | 2.8606533533  | 4.503106799   |
| H | -4.4435512778 | 3.4896671194  | 4.8490542175  |
| C | -2.3396764382 | 3.3817215576  | 4.4090027689  |
| H | -2.1468394976 | 4.4148598326  | 4.6835190749  |
| C | -1.290450711  | 2.577983809   | 3.9672166538  |
| H | -0.2873524163 | 2.9933208723  | 3.9064821136  |
| C | 1.7890728     | 0.8848876844  | 3.7688062356  |
| C | 2.1880765911  | 0.5233409614  | 5.0592566847  |
| C | 3.3213135675  | 1.1086622462  | 5.6190959981  |
| H | 3.6330382504  | 0.8262708416  | 6.6206066263  |
| C | 4.0532435889  | 2.0504168227  | 4.8979502668  |
| H | 4.9366589439  | 2.5029924735  | 5.3390863573  |
| C | 3.6577231217  | 2.4094115347  | 3.6113843242  |
| H | 4.228901078   | 3.1410246265  | 3.0470191876  |
| C | 2.527611876   | 1.8250755406  | 3.0419352511  |
| H | 2.2293328332  | 2.1032151223  | 2.0326027766  |
| C | -0.2690577147 | -1.815703846  | 3.8805406844  |
| C | 0.0573364749  | -3.0226873675 | 3.2545095855  |
| C | -0.1276078515 | -4.2273529096 | 3.929100974   |
| H | 0.1267684569  | -5.1634977142 | 3.4403997092  |
| C | -0.6403976107 | -4.2292803183 | 5.2246264498  |
| H | -0.7854161155 | -5.169630502  | 5.7485397287  |
| C | -0.9726014722 | -3.0284070234 | 5.8475798325  |
| H | -1.3771393241 | -3.0292706526 | 6.8556096891  |
| C | -0.7914744453 | -1.8193886138 | 5.1790770681  |
| H | -1.0669849543 | -0.8908385975 | 5.6728936713  |
| H | -3.0323728216 | -0.3145851894 | 3.4565720276  |
| H | 1.6288065943  | -0.2139332569 | 5.6298057048  |
| H | 0.449327196   | -3.033303896  | 2.240262538   |
| H | -0.0620950669 | -3.2449198707 | -1.2788956573 |
| H | -1.7488134048 | -3.3312522319 | -0.0137887281 |
| H | -1.7586993459 | -2.0736043167 | -1.7098676089 |
| H | -1.1851638804 | 2.6250652724  | -0.1723136701 |
| H | -2.181888463  | 1.0050504628  | -1.2269566683 |
| H | -2.5836386448 | 1.3465207205  | 0.8897014633  |
| H | 3.4393453714  | -0.037992021  | 0.1843532499  |
| H | 2.9854011264  | -1.5464284553 | 1.6720070409  |
| H | 2.7156967475  | -1.9948604785 | -0.4342013895 |

XYZ coordinates of the optimized structure of **3<sub>m</sub>F**

49

|    |              |               |               |
|----|--------------|---------------|---------------|
| Pd | 0.0714567629 | 0.0651304186  | -0.0444432547 |
| P  | 0.0762318966 | 2.425823108   | -0.3270697527 |
| Cl | 0.1151661272 | -0.0571058222 | -2.5784038068 |
| Sb | 0.0180377068 | 0.1976633797  | 2.6215047713  |
| P  | -1.969638083 | -1.147518135  | -0.1916923268 |
| P  | 2.1343390401 | -1.1202276815 | -0.1127157466 |
| C  | 2.1144109831 | 0.5987498739  | 2.9332840444  |
| C  | 2.8501176615 | 1.3769609578  | 2.0372880249  |

|   |               |               |               |
|---|---------------|---------------|---------------|
| C | 4.2063147297  | 1.6124471732  | 2.2602241593  |
| H | 4.765892902   | 2.2332300296  | 1.5656984561  |
| C | 4.8394663463  | 1.0468415898  | 3.364655175   |
| H | 5.8987714793  | 1.2204339731  | 3.5326468244  |
| C | 4.1107651161  | 0.2590445052  | 4.2530462431  |
| H | 4.6001273603  | -0.185815599  | 5.115341449   |
| C | 2.7486315126  | 0.0434825206  | 4.048927564   |
| H | 2.1814095189  | -0.5437806548 | 4.762744547   |
| C | -1.3684467434 | 1.8410863596  | 2.7959107101  |
| C | -2.421427608  | 2.0078649467  | 1.8940619348  |
| C | -3.2952735968 | 3.0864723971  | 2.0259783917  |
| H | -4.1215112202 | 3.197862985   | 1.328972116   |
| C | -3.1027867885 | 4.0191794218  | 3.0426296068  |
| H | -3.7764517794 | 4.8661859926  | 3.1387774931  |
| C | -2.0448387879 | 3.8626760734  | 3.9354386299  |
| H | -1.8890300876 | 4.588373969   | 4.7291700161  |
| C | -1.1852007854 | 2.7707575189  | 3.8241637233  |
| H | -0.3837251607 | 2.6382871541  | 4.542784739   |
| C | -0.7082307649 | -1.7994693929 | 2.9925938662  |
| C | -0.3316989572 | -2.8767650859 | 2.1879293322  |
| C | -0.8255725182 | -4.1545001972 | 2.4487048952  |
| H | -0.5131767015 | -4.9893082305 | 1.8271112201  |
| C | -1.7209849652 | -4.3552693378 | 3.4968409591  |
| H | -2.1149466223 | -5.348607948  | 3.6932244914  |
| C | -2.1092408551 | -3.2795314416 | 4.2923983253  |
| H | -2.808920691  | -3.4302521999 | 5.110116908   |
| C | -1.5966249536 | -2.0055135327 | 4.0524958785  |
| H | -1.8780913604 | -1.1792829825 | 4.6962283003  |
| F | -0.0272480932 | 0.2994399216  | 4.6705105761  |
| H | -2.5635317778 | 1.3071544968  | 1.0758034108  |
| H | 0.3395456456  | -2.7289296177 | 1.3462957524  |
| H | 2.3766489138  | 1.7967603773  | 1.1539396417  |
| H | -2.8869588622 | -1.4544915937 | 0.8401515661  |
| H | -2.89760161   | -0.6446056928 | -1.1301393168 |
| H | -1.8556569135 | -2.4498227383 | -0.7238311873 |
| H | 3.2028167938  | -0.4330320049 | -0.7278447379 |
| H | 2.8688286727  | -1.6673899792 | 0.9649840371  |
| H | 2.14315112    | -2.2596547264 | -0.9473923937 |
| H | 1.0520965972  | 2.9197810643  | -1.2207299379 |
| H | -1.0577115203 | 2.9562317099  | -0.978880739  |
| H | 0.1995599706  | 3.4269802767  | 0.6642696101  |

XYZ coordinates of the optimized structure of **2<sub>m</sub>Si**

44

|    |               |               |               |
|----|---------------|---------------|---------------|
| Pd | -0.2272197172 | 0.1445672323  | 0.871930643   |
| P  | -2.438000804  | -0.468895986  | 1.1311989844  |
| Cl | -0.6586323572 | 0.3609548116  | -1.5699027167 |
| Si | 0.033691403   | -0.0122413974 | 3.2104838592  |
| P  | 1.9779657598  | 0.7387735098  | 0.6550830002  |

|   |               |               |               |
|---|---------------|---------------|---------------|
| C | -1.4361313304 | 0.8844883857  | 4.012500639   |
| C | -2.1053308735 | 0.366499301   | 5.1318061037  |
| C | -3.1751731498 | 1.0466524011  | 5.7119809242  |
| H | -3.6799941953 | 0.6225266343  | 6.5763031968  |
| C | -3.5988506592 | 2.2646504915  | 5.1849831741  |
| H | -4.4330613754 | 2.7948586937  | 5.6367247556  |
| C | -2.9512838329 | 2.7970998977  | 4.0714802857  |
| H | -3.2782838827 | 3.7447643888  | 3.6511178894  |
| C | -1.8873576523 | 2.109487494   | 3.4909520629  |
| H | -1.4054487753 | 2.528826994   | 2.60818496    |
| C | 1.6085896627  | 0.7956191664  | 3.895472431   |
| C | 2.7967862996  | 0.0593248504  | 4.0401619138  |
| C | 3.966126646   | 0.6555581572  | 4.5094041483  |
| H | 4.8698638808  | 0.0616283087  | 4.6197594567  |
| C | 3.9738785372  | 2.0085999097  | 4.8417149821  |
| H | 4.8837245221  | 2.4755960548  | 5.2094821339  |
| C | 2.8064265394  | 2.7585678663  | 4.7074141291  |
| H | 2.8025657897  | 3.8125578191  | 4.9734200593  |
| C | 1.640033517   | 2.1569219982  | 4.24135335    |
| H | 0.7361488576  | 2.756416435   | 4.1571992025  |
| C | 0.0699299745  | -1.8288702464 | 3.7424504517  |
| C | 0.3749387388  | -2.1694813071 | 5.0721270497  |
| H | 0.6201916507  | -1.3883508259 | 5.7892653442  |
| C | 0.3833848829  | -3.4964875652 | 5.495190206   |
| H | 0.6189533501  | -3.7334070617 | 6.5295590513  |
| C | 0.0970253366  | -4.5186470397 | 4.591923962   |
| H | 0.1068288297  | -5.5547794682 | 4.9197980139  |
| C | -0.1915769615 | -4.2070266636 | 3.2655635428  |
| H | -0.4028544815 | -4.9994929314 | 2.5521969547  |
| C | -0.2032735717 | -2.8762975809 | 2.8498327664  |
| H | -0.4130657229 | -2.648461165  | 1.8058459356  |
| H | -1.7939680113 | -0.5851645014 | 5.5562820406  |
| H | 2.807418711   | -1.0009856919 | 3.7954248618  |
| H | -3.3516769419 | 0.5687432347  | 0.8696774757  |
| H | -2.8913573284 | -1.4322212235 | 0.2100652517  |
| H | -2.9894468117 | -0.9789434224 | 2.3215606938  |
| H | 2.4093191269  | 0.9113438932  | -0.6747280686 |
| H | 2.4146089564  | 1.948535206   | 1.2252529489  |
| H | 2.9830183837  | -0.1202134678 | 1.1356567792  |
